# Supplementary material for: Kap-β2/Transportin mediates β-catenin nuclear transport in Wnt signaling
Source: eLife. 2022 Oct 27;11:e70495. doi: 10.7554/eLife.70495 (PMC9665845; doi:10.7554/eLife.70495)
Supplement: Figure 1—source data 1. [file elife-70495-fig1-data1.xlsx]

## Sheet: Figure 1A GFP
	area	mean	min	max	Int Den	Raw Int Den	N/C
1	0.743	119.757	102	137	89.007	21197	1.02169
2	0.743	117.215	98	139	87.117	20747
3	0.743	113.571	93	132	84.409	20102	0.980012
4	0.743	115.887	98	135	86.131	20512
5	0.743	123.39	109	143	91.707	21840	1.0253
6	0.743	120.345	100	137	89.444	21301
7	0.743	123.034	106	140	91.442	21777	1.05254
8	0.743	116.893	98	144	86.878	20690
9	0.743	119.96	101	141	89.158	21233	1.03591
10	0.743	115.802	99	135	86.068	20497
11	0.743	131.684	112	159	97.871	23308	1.00783
12	0.743	130.661	108	155	97.111	23127
13	0.743	125.525	104	147	93.294	22218	1.00429
14	0.743	124.989	109	145	92.895	22123
15	0.743	136.136	109	162	101.18	24096	1.01431
16	0.743	134.215	116	157	99.752	23756
17	0.743	124.237	105	146	92.337	21990	0.957753
18	0.743	129.718	115	159	96.41	22960
19	0.743	128.322	102	154	95.373	22713	1.01834
20	0.743	126.011	105	142	93.655	22304
21	0.743	133.277	113	157	99.055	23590	1.06042
22	0.743	125.684	105	160	93.412	22246
23	0.743	117.599	102	137	87.403	20815	0.96814
24	0.743	121.469	99	147	90.279	21500
25	0.743	121.785	101	142	90.515	21556	1.01598
26	0.743	119.87	96	143	89.091	21217
27	0.743	117.763	99	138	87.525	20844	1.02212
28	0.743	115.215	98	132	85.631	20393
29	0.743	119.87	103	135	89.091	21217	1.02113
30	0.743	117.39	99	144	87.248	20778
31	0.743	127.379	104	149	94.672	22546	1.00904
32	0.743	126.237	108	155	93.823	22344
33	0.743	123.424	104	153	91.732	21846	0.989402
34	0.743	124.746	104	146	92.715	22080
35	0.743	123.215	106	145	91.577	21809	1.02858
36	0.743	119.791	98	138	89.032	21203
37	0.743	126.017	105	145	93.66	22305	1.00527
38	0.743	125.356	110	147	93.168	22188
39	0.743	123.689	102	146	91.93	21893	1.01743
40	0.743	121.571	101	144	90.355	21518
41	0.743	119.395	99	144	88.738	21133	0.972661
42	0.743	122.751	102	152	91.233	21727
43	0.743	125.006	108	147	92.908	22126	1.01259
44	0.743	123.452	101	146	91.753	21851
45	0.743	123.424	101	145	91.732	21846	1.0169
46	0.743	121.373	104	141	90.208	21483
47	0.743	123.695	105	149	91.934	21894	1.02615
48	0.743	120.542	104	136	89.591	21336
49	0.743	130.994	115	148	97.359	23186	1.07682
50	0.743	121.65	104	143	90.414	21532
51	0.743	128.045	105	144	95.167	22664	1.00872
52	0.743	126.938	109	153	94.344	22468
53	0.743	123.915	102	146	92.098	21933	1.00046
54	0.743	123.859	103	143	92.056	21923
55	0.743	120.203	103	143	89.339	21276	1.04911
56	0.743	114.576	95	144	85.157	20280
57	0.743	134.576	110	165	100.021	23820	1.05937
58	0.743	127.034	108	151	94.415	22485
59	0.743	121.333	104	138	90.179	21476	1.00581
60	0.743	120.633	106	145	89.658	21352
61	0.743	121.034	104	144	89.956	21423	1.0584
62	0.743	114.356	100	130	84.993	20241
63	0.743	122.989	104	143	91.409	21769	0.985736
64	0.743	124.768	96	146	92.732	22084
65	0.743	123.831	106	149	92.035	21918	1.01816
66	0.743	121.621	105	141	90.393	21527
67	0.743	123.994	100	142	92.156	21947	0.988381
68	0.743	125.452	105	148	93.24	22205
69	0.743	129.497	108	155	96.246	22921	1.05345
70	0.743	122.927	99	142	91.363	21758
71	0.743	126.768	110	144	94.218	22438	1.00085
72	0.743	126.661	100	150	94.138	22419
73	0.743	121.486	104	137	90.292	21503	0.980753
74	0.743	123.87	108	150	92.064	21925
75	0.743	139.096	115	162	103.38	24620	1.02789
76	0.743	135.322	115	158	100.575	23952
77	0.743	122.136	105	143	90.775	21618	0.971639
78	0.743	125.701	110	152	93.424	22249
79	0.743	122.729	102	147	91.216	21723	1.00691
80	0.743	121.887	98	149	90.59	21574
81	0.743	121.593	104	139	90.372	21522	1.00537
82	0.743	120.944	107	138	89.889	21407
83	0.743	123.136	102	147	91.518	21795	1.03343
84	0.743	119.153	97	140	88.558	21090
85	0.743	142.362	122	166	105.807	25198	1.033
86	0.743	137.814	109	169	102.427	24393
87	0.743	129.893	108	149	96.54	22991	1.02542
88	0.743	126.672	110	146	94.147	22421
89	0.743	122.424	99	142	90.989	21669	1.00964
90	0.743	121.254	106	143	90.12	21462
91	0.743	124.61	106	142	92.614	22056	1.02173
92	0.743	121.96	106	154	90.645	21587
93	0.743	131.311	108	155	97.594	23242	1.03847
94	0.743	126.446	108	146	93.979	22381
95	0.743	122	100	142	90.674	21594	1.02506
96	0.743	119.017	98	143	88.457	21066
97	0.743	113.119	89	141	84.073	20022	0.987814
98	0.743	114.514	96	145	85.11	20269
99	0.743	119.768	95	141	89.015	21199	1.02808
100	0.743	116.497	102	134	86.584	20620
101	0.743	124.158	107	144	92.278	21976	0.986444
102	0.743	125.864	107	148	93.546	22278
103	0.743	123.729	103	146	91.959	21900	1.00046
104	0.743	123.672	107	151	91.917	21890
105	0.743	125.04	100	147	92.933	22132	1.07982
106	0.743	115.797	99	137	86.064	20496
107	0.743	120.379	103	139	89.469	21307	0.9919
108	0.743	121.362	103	140	90.2	21481
109	4.56	223.503	190	254	1019.08	39560	1.0577
110	4.56	211.311	181	247	963.485	37402
111	4.56	223.119	183	253	1017.32	39492	0.957451
112	4.56	233.034	206	271	1062.53	41247
113	4.56	195.096	174	220	889.553	34532	1.03703
114	4.56	188.13	145	233	857.791	33299
115	4.56	211.492	176	248	964.309	37434	1.08492
116	4.56	194.938	155	225	888.832	34504
117	4.56	191.486	172	215	873.092	33893	1.20999
118	4.56	158.254	134	194	721.57	28011
119	4.56	182.785	159	213	833.421	32353	0.958068
120	4.56	190.785	158	217	869.898	33769
121	4.56	200.571	158	225	914.515	35501	0.999212
122	4.56	200.729	170	235	915.236	35529
123	4.56	217.492	180	246	991.667	38496	1.07911
124	4.56	201.548	172	231	918.971	35674
125	4.56	233.932	206	269	1066.63	41406	0.933956
126	4.56	250.475	206	285	1142.06	44334
127	4.56	236.215	189	277	1077.04	41810	1.16071
128	4.56	203.508	176	232	927.91	36021
129	4.56	200.514	170	225	914.257	35491	1.0642
130	4.56	188.418	163	223	859.104	33350
131	4.56	203.271	180	241	926.828	35979	1.1047
132	4.56	184.006	160	214	838.986	32569
133	4.56	196.746	173	220	897.075	34824	1.07858
134	4.56	182.412	155	203	831.721	32287
135	4.56	253.181	221	288	1154.39	44813	1.07781
136	4.56	234.904	178	280	1071.06	41578
137	4.56	227.723	196	261	1038.32	40307	1.06326
138	4.56	214.175	188	247	976.545	37909
139	4.56	233.102	189	267	1062.84	41259	1.03901
140	4.56	224.35	197	253	1022.94	39710
141	4.56	199.395	175	226	909.157	35293	1.07345
142	4.56	185.751	161	216	846.945	32878
143	4.56	193.463	169	229	882.108	34243	1.00973
144	4.56	191.599	152	225	873.607	33913
145	4.56	215.582	175	247	982.96	38158	1.10963
146	4.56	194.282	167	227	885.843	34388
147	4.56	199.215	164	227	908.332	35261	1.12132
148	4.56	177.661	156	208	810.057	31446
149	4.56	227.35	199	260	1036.62	40241	1.10787
150	4.56	205.215	177	237	935.69	36323
151	4.56	177.26	143	200	808.228	31375	1.03527
152	4.56	171.22	148	192	780.69	30306
153	4.56	209.531	186	234	955.37	37087	1.05884
154	4.56	197.887	175	225	902.279	35026
155	4.56	196.898	173	221	897.77	34851	0.991748
156	4.56	198.537	164	233	905.241	35141
157	4.56	205.944	161	243	939.013	36452	1.02201
158	4.56	201.508	175	228	918.791	35667
159	4.56	220.966	187	255	1007.51	39111	1.12372
160	4.56	196.638	176	231	896.586	34805
161	4.56	203.226	173	244	926.622	35971	0.945958
162	4.56	214.836	182	253	979.559	38026
163	4.56	199.627	179	233	910.213	35334	1.20401
164	4.56	165.802	138	207	755.986	29347
165	4.56	214.605	194	245	978.503	37985	1.04653
166	4.56	205.062	176	232	934.994	36296
167	4.56	188.017	171	210	857.275	33279	1.00129
168	4.56	187.774	173	212	856.168	33236
169	4.56	202.638	176	238	923.943	35867	0.977196
170	4.56	207.367	172	259	945.504	36704
171	4.56	199.531	173	223	909.775	35317	1.21077
172	4.56	164.797	127	195	751.401	29169
173	4.56	239.593	208	270	1092.44	42408	1.12593
174	4.56	212.797	179	250	970.26	37665
175	4.56	189.26	158	216	862.943	33499	0.987443
176	4.56	191.667	170	222	873.916	33925
177	4.56	202.401	180	232	922.861	35825	1.15676
178	4.56	174.972	149	214	797.795	30970
179	4.56	209.847	182	238	956.813	37143	1.00514
180	4.56	208.774	168	242	951.919	36953
181	4.56	204.085	181	228	930.538	36123	1.07515
182	4.56	189.819	163	221	865.493	33598
183	4.56	211.412	181	245	963.949	37420	1.1538
184	4.56	183.232	157	208	835.456	32432
185	4.56	238.847	204	270	1089.04	42276	1.14038
186	4.56	209.446	154	246	954.984	37072
187	4.56	179.22	153	214	817.167	31722	1.0505
188	4.56	170.605	145	198	777.882	30197
189	4.56	197.881	173	223	902.253	35025	1.16563
190	4.56	169.763	133	204	774.044	30048
191	4.56	201.847	173	237	920.336	35727	1.01428
192	4.56	199.006	169	228	907.379	35224
193	4.56	228.599	202	256	1042.31	40462	1.02891
194	4.56	222.175	194	249	1013.02	39325
195	4.56	209.537	183	242	955.396	37088	1.10276
196	4.56	190.011	164	220	866.369	33632
197	4.56	186.814	163	213	851.788	33066	1.02125
198	4.56	182.927	159	205	834.065	32378
199	4.56	229.181	205	260	1044.96	40565	1.21572
200	4.56	188.514	160	216	859.542	33367
201	4.56	215.328	187	248	981.8	38113	1.05418
202	4.56	204.26	179	232	931.336	36154
203	4.56	246.91	204	296	1125.8	43703	1.02964
204	4.56	239.802	194	284	1093.39	42445
205	4.56	246.096	211	282	1122.09	43559	1.04765
206	4.56	234.904	201	273	1071.06	41578
207	4.56	203.034	182	234	925.746	35937	1.2369
208	4.56	164.147	138	188	748.438	29054
209	4.56	215.395	187	259	982.11	38125	1.04753
210	4.56	205.621	180	241	937.544	36395
211	4.56	215.825	183	249	984.067	38201	1.14663
212	4.56	188.226	149	223	858.228	33316
213	4.56	193.04	167	222	880.176	34168	1.06379
214	4.56	181.463	156	208	827.393	32119
215	4.56	195.966	176	219	893.52	34686	1.0855
216	4.56	180.531	144	212	823.143	31954
217	4.56	190.136	155	228	866.935	33654	1.06218
218	4.56	179.006	156	220	816.188	31684
219	4.56	180.949	156	208	825.049	32028	0.971605
220	4.56	186.237	163	214	849.161	32964

## Sheet: Figure 1A xBcat_GFP
	area	mean	min	max	Int Den	Raw Int Den	N/C
1	0.743	258.695	220	310	192.27	45789	1.61724
2	0.743	159.96	120	200	118.887	28313
3	0.743	273.814	194	524	203.506	48465	1.58139
4	0.743	173.147	139	203	128.688	30647
5	0.743	309.531	184	586	230.053	54787	1.66445
6	0.743	185.966	157	236	138.216	32916
7	0.743	303.401	237	463	225.497	53702	1.51444
8	0.743	200.339	169	248	148.898	35460
9	0.743	317.927	186	409	236.293	56273	1.62676
10	0.743	195.435	146	229	145.253	34592
11	0.743	307.39	231	399	228.461	54408	1.57362
12	0.743	195.339	142	235	145.182	34575
13	0.743	313.486	249	375	232.992	55487	1.51811
14	0.743	206.497	161	248	153.475	36550
15	0.743	325.282	229	423	241.76	57575	1.53329
16	0.743	212.147	173	243	157.674	37550
17	0.743	291.621	243	342	216.742	51617	1.44194
18	0.743	202.243	162	244	150.313	35797
19	0.743	250.842	211	295	186.433	44399	1.4138
20	0.743	177.424	149	221	131.867	31404
21	0.743	283.91	231	379	211.01	50252	1.66762
22	0.743	170.249	117	204	126.534	30134
23	0.743	317.559	262	445	236.02	56208	1.62597
24	0.743	195.305	128	242	145.157	34569
25	0.743	316.983	253	366	235.591	56106	1.50301
26	0.743	210.898	164	252	156.746	37329
27	0.743	302.232	218	422	224.628	53495	1.44055
28	0.743	209.802	170	261	155.931	37135
29	0.743	271.339	233	342	201.667	48027	1.49991
30	0.743	180.904	140	210	134.453	32020
31	0.743	281.989	234	340	209.582	49912	1.41422
32	0.743	199.395	154	234	148.197	35293
33	0.743	345.949	271	674	257.12	61233	2.00665
34	0.743	172.401	132	214	128.134	30515
35	0.743	302.181	226	526	224.59	53486	1.48742
36	0.743	203.158	161	236	150.993	35959
37	0.743	362.932	310	557	269.742	64239	1.67643
38	0.743	216.492	178	255	160.903	38319
39	0.743	312.616	211	474	232.345	55333	1.54092
40	0.743	202.876	159	248	150.783	35909
41	0.743	347.192	249	641	258.044	61453	1.65218
42	0.743	210.141	177	252	156.183	37195
43	0.743	332.785	262	443	247.336	58903	1.66271
44	0.743	200.147	168	228	148.755	35426
45	0.743	311.949	251	558	231.85	55215	1.76535
46	0.743	176.706	145	224	131.333	31277
47	0.743	358.13	295	520	266.173	63389	1.52191
48	0.743	235.316	189	274	174.894	41651
49	0.743	371.469	230	616	276.087	65750	1.66641
50	0.743	222.915	164	260	165.677	39456
51	0.743	305.04	233	418	226.715	53992	1.46272
52	0.743	208.542	165	242	154.995	36912
53	0.743	358.48	241	501	266.433	63451	1.94498
54	0.743	184.311	159	226	136.985	32623
55	0.743	376.339	315	453	279.706	66612	1.6123
56	0.743	233.418	195	280	173.483	41315
57	0.743	319.588	260	442	237.527	56567	1.65822
58	0.743	192.729	162	232	143.242	34113
59	0.743	392.096	235	612	291.418	69401	1.62883
60	0.743	240.723	208	277	178.913	42608
61	0.743	296.13	241	357	220.093	52415	1.57995
62	0.743	187.429	140	233	139.303	33175
63	0.743	331.904	262	406	246.681	58747	1.53716
64	0.743	215.921	166	267	160.479	38218
65	0.743	298.407	212	387	221.785	52818	1.44134
66	0.743	207.034	170	244	153.874	36645
67	0.743	279.542	216	499	207.764	49479	1.51609
68	0.743	184.384	147	225	137.04	32636
69	0.743	279.04	198	442	207.391	49390	1.494
70	0.743	186.774	151	227	138.816	33059
71	0.743	296.864	244	384	220.639	52545	1.38233
72	0.743	214.757	186	257	159.614	38012
73	0.743	278.65	218	352	207.101	49321	1.49798
74	0.743	186.017	149	220	138.253	32925
75	0.743	277.107	215	351	205.955	49048	1.51103
76	0.743	183.39	144	232	136.301	32460
77	0.743	272.266	232	325	202.356	48191	1.35971
78	0.743	200.237	165	252	148.822	35442
79	0.743	300.136	245	373	223.07	53124	1.60588
80	0.743	186.898	138	227	138.908	33081
81	0.743	286.91	221	340	213.24	50783	1.43735
82	0.743	199.61	165	234	148.356	35331
83	0.743	264.249	236	303	196.397	46772	1.45548
84	0.743	181.554	151	215	134.936	32135
85	0.743	313.288	237	383	232.845	55452	1.39847
86	0.743	224.023	192	267	166.5	39652
87	0.743	316.757	255	380	235.423	56066	1.48602
88	0.743	213.158	163	253	158.426	37729
89	0.743	292.158	211	386	217.141	51712	1.36224
90	0.743	214.469	158	248	159.4	37961
91	0.743	307.305	249	366	228.398	54393	1.49468
92	0.743	205.599	179	242	152.807	36391
93	0.743	317.734	260	402	236.15	56239	1.46414
94	0.743	217.011	177	259	161.289	38411
95	0.743	280.441	228	356	208.432	49638	1.4433
96	0.743	194.305	158	224	144.413	34392
97	0.743	352.017	269	426	261.63	62307	1.43956
98	0.743	244.531	200	303	181.743	43282
99	0.743	347.158	261	413	258.018	61447	1.39814
100	0.743	248.299	193	308	184.544	43949
101	0.743	281.633	241	334	209.318	49849	1.39449
102	0.743	201.96	161	241	150.103	35747
103	0.743	289.514	224	365	215.176	51244	1.53255
104	0.743	188.91	164	236	140.403	33437
105	0.743	331.559	216	389	246.425	58686	1.55069
106	0.743	213.814	177	251	158.913	37845
107	0.743	337.497	244	961	250.838	59737	1.82264
108	0.743	185.169	149	225	137.624	32775
109	0.743	295.362	241	377	219.522	52279	1.64622
110	0.743	179.418	149	226	133.349	31757
111	0.743	306.107	238	364	227.508	54181	1.54283
112	0.743	198.407	143	236	147.462	35118
113	0.743	315.249	235	519	234.302	55799	1.60841
114	0.743	196	151	244	145.673	34692
115	0.743	265.893	225	311	197.619	47063	1.42133
116	0.743	187.073	142	231	139.039	33112
117	0.743	295.395	248	355	219.547	52285	1.42164
118	0.743	207.785	176	245	154.432	36778
119	0.743	364.599	309	428	270.981	64534	1.65765
120	0.743	219.949	171	272	163.473	38931
121	0.743	350.52	264	651	260.517	62042	1.54399
122	0.743	227.023	190	260	168.73	40183
123	0.743	328.35	276	400	244.04	58118	1.90501
124	0.743	172.362	111	225	128.104	30508
125	0.743	317.395	265	386	235.898	56179	1.66906
126	0.743	190.164	128	229	141.335	33659
127	0.743	303.119	223	379	225.287	53652	1.52663
128	0.743	198.554	155	238	147.571	35144
129	0.743	280.695	217	326	208.621	49683	1.566
130	0.743	179.243	141	216	133.219	31726
131	0.743	288.831	250	348	214.668	51123	1.4236
132	0.743	202.887	174	252	150.792	35911
133	0.743	307.068	219	360	228.222	54351	1.49025
134	0.743	206.051	131	265	153.143	36471
135	0.743	251.023	210	296	186.568	44431	1.48281
136	0.743	169.288	137	199	125.82	29964
137	0.743	338.299	285	389	251.434	59879	1.6049
138	0.743	210.791	170	240	156.666	37310
139	0.743	313.124	265	370	232.723	55423	1.43952
140	0.743	217.52	186	262	161.667	38501
141	0.743	328.582	218	643	244.212	58159	1.70504
142	0.743	192.712	162	225	143.229	34110
143	0.743	266.492	204	313	198.065	47169	1.42699
144	0.743	186.751	133	232	138.799	33055
145	0.743	300.616	220	367	223.427	53209	1.49066
146	0.743	201.667	140	245	149.885	35695
147	0.743	318.571	184	477	236.771	56387	1.58151
148	0.743	201.435	174	239	149.713	35654
149	0.743	297.282	184	397	220.949	52619	1.41796
150	0.743	209.655	171	245	155.822	37109
151	0.743	290.322	240	348	215.776	51387	1.41453
152	0.743	205.243	154	246	152.543	36328
153	0.743	304.153	256	379	226.055	53835	1.70299
154	0.743	178.599	150	206	132.74	31612
155	0.743	313.407	213	515	232.933	55473	1.61748
156	0.743	193.763	168	227	144.01	34296
157	0.743	339.599	274	430	252.4	60109	1.58599
158	0.743	214.124	177	259	159.144	37900
159	0.743	323.322	236	412	240.303	57228	1.64123
160	0.743	197	150	241	146.416	34869
161	0.743	345.797	273	464	257.006	61206	1.74974
162	0.743	197.627	165	223	146.882	34980
163	0.743	266.712	233	310	198.228	47208	1.44239
164	0.743	184.91	148	231	137.43	32729
165	0.743	314.554	207	465	233.786	55676	1.57638
166	0.743	199.542	165	251	148.306	35319
167	0.743	272.542	217	336	202.562	48240	1.50061
168	0.743	181.621	159	214	134.987	32147
169	0.743	406.514	310	636	302.134	71953	1.77071
170	0.743	229.576	194	266	170.628	40635
171	0.743	284.266	239	348	211.275	50315	1.67689
172	0.743	169.52	135	207	125.992	30005
173	0.743	295.051	159	909	219.291	52224	1.6607
174	0.743	177.667	148	211	132.047	31447
175	0.743	303.718	171	1816	225.732	53758	1.78901
176	0.743	169.768	138	202	126.177	30049
177	0.743	342.977	157	963	254.911	60707	1.99931
178	0.743	171.548	142	212	127.5	30364
179	0.743	318.599	268	388	236.792	56392	1.59129
180	0.743	200.215	151	243	148.806	35438
181	0.743	281.977	210	474	209.574	49910	1.74218
182	0.743	161.853	126	197	120.294	28648
183	0.743	332.706	142	819	247.277	58889	1.53165
184	0.743	217.22	186	253	161.445	38448
185	0.743	291.701	245	347	216.801	51631	1.48664
186	0.743	196.215	165	234	145.833	34730
187	0.743	354.78	257	767	263.683	62796	1.55655
188	0.743	227.927	180	283	169.402	40343
189	0.743	358.373	253	695	266.354	63432	1.70713
190	0.743	209.927	179	243	156.024	37157
191	0.743	309.085	222	396	229.721	54708	1.47788
192	0.743	209.141	174	244	155.44	37018
193	0.743	290.107	177	471	215.617	51349	1.35393
194	0.743	214.271	180	254	159.253	37926
195	0.743	309.096	199	494	229.729	54710	1.40896
196	0.743	219.379	188	255	163.049	38830
197	0.743	307.045	203	489	228.205	54347	1.69
198	0.743	181.684	148	220	135.033	32158
199	0.743	377.768	181	725	280.769	66865	1.71085
200	0.743	220.808	187	275	164.111	39083
201	0.743	282.062	194	404	209.637	49925	1.39067
202	0.743	202.825	175	246	150.746	35900
203	0.743	326.621	275	368	242.755	57812	1.54573
204	0.743	211.305	151	261	157.048	37401
205	0.743	338.644	212	1030	251.69	59940	1.49906
206	0.743	225.904	189	280	167.899	39985
207	0.743	291.299	208	517	216.503	51560	1.63402
208	0.743	178.271	150	223	132.497	31554
209	0.743	234.446	188	270	174.248	41497	1.45742
210	0.743	160.864	139	183	119.559	28473
211	0.743	286.554	210	419	212.975	50720	1.68527
212	0.743	170.034	134	218	126.374	30096

## Sheet: Figure 1B WT RT
	area	mean	Min	Max	IntDen	RawIntDen	Raw N/C
1	0.743	258.695	220	310	192.27	45789	1.61724
2	0.743	159.96	120	200	118.887	28313
3	0.743	273.814	194	524	203.506	48465	1.58139
4	0.743	173.147	139	203	128.688	30647
5	0.743	309.531	184	586	230.053	54787	1.66445
6	0.743	185.966	157	236	138.216	32916
7	0.743	303.401	237	463	225.497	53702	1.51444
8	0.743	200.339	169	248	148.898	35460
9	0.743	317.927	186	409	236.293	56273	1.62676
10	0.743	195.435	146	229	145.253	34592
11	0.743	307.39	231	399	228.461	54408	1.57362
12	0.743	195.339	142	235	145.182	34575
13	0.743	313.486	249	375	232.992	55487	1.51811
14	0.743	206.497	161	248	153.475	36550
15	0.743	325.282	229	423	241.76	57575	1.53329
16	0.743	212.147	173	243	157.674	37550
17	0.743	291.621	243	342	216.742	51617	1.44194
18	0.743	202.243	162	244	150.313	35797
19	0.743	250.842	211	295	186.433	44399	1.4138
20	0.743	177.424	149	221	131.867	31404
21	0.743	283.91	231	379	211.01	50252	1.66762
22	0.743	170.249	117	204	126.534	30134
23	0.743	317.559	262	445	236.02	56208	1.62597
24	0.743	195.305	128	242	145.157	34569
25	0.743	316.983	253	366	235.591	56106	1.50301
26	0.743	210.898	164	252	156.746	37329
27	0.743	302.232	218	422	224.628	53495	1.44055
28	0.743	209.802	170	261	155.931	37135
29	0.743	271.339	233	342	201.667	48027	1.49991
30	0.743	180.904	140	210	134.453	32020
31	0.743	281.989	234	340	209.582	49912	1.41422
32	0.743	199.395	154	234	148.197	35293
33	0.743	345.949	271	674	257.12	61233	2.00665
34	0.743	172.401	132	214	128.134	30515
35	0.743	302.181	226	526	224.59	53486	1.48742
36	0.743	203.158	161	236	150.993	35959
37	0.743	362.932	310	557	269.742	64239	1.67643
38	0.743	216.492	178	255	160.903	38319
39	0.743	312.616	211	474	232.345	55333	1.54092
40	0.743	202.876	159	248	150.783	35909
41	0.743	347.192	249	641	258.044	61453	1.65218
42	0.743	210.141	177	252	156.183	37195
43	0.743	332.785	262	443	247.336	58903	1.66271
44	0.743	200.147	168	228	148.755	35426
45	0.743	311.949	251	558	231.85	55215	1.76535
46	0.743	176.706	145	224	131.333	31277
47	0.743	358.13	295	520	266.173	63389	1.52191
48	0.743	235.316	189	274	174.894	41651
49	0.743	371.469	230	616	276.087	65750	1.66641
50	0.743	222.915	164	260	165.677	39456
51	0.743	305.04	233	418	226.715	53992	1.46272
52	0.743	208.542	165	242	154.995	36912
53	0.743	376.339	315	453	279.706	66612	1.6123
54	0.743	233.418	195	280	173.483	41315
55	0.743	319.588	260	442	237.527	56567	1.65822
56	0.743	192.729	162	232	143.242	34113
57	0.743	392.096	235	612	291.418	69401	1.62883
58	0.743	240.723	208	277	178.913	42608
59	0.743	296.13	241	357	220.093	52415	1.57995
60	0.743	187.429	140	233	139.303	33175
61	0.743	331.904	262	406	246.681	58747	1.53716
62	0.743	215.921	166	267	160.479	38218
63	0.743	298.407	212	387	221.785	52818	1.44134
64	0.743	207.034	170	244	153.874	36645
65	0.743	279.542	216	499	207.764	49479	1.51609
66	0.743	184.384	147	225	137.04	32636
67	0.743	279.04	198	442	207.391	49390	1.494
68	0.743	186.774	151	227	138.816	33059
69	0.743	296.864	244	384	220.639	52545	1.38233
70	0.743	214.757	186	257	159.614	38012
71	0.743	278.65	218	352	207.101	49321	1.49798
72	0.743	186.017	149	220	138.253	32925
73	0.743	277.107	215	351	205.955	49048	1.51103
74	0.743	183.39	144	232	136.301	32460
75	0.743	300.136	245	373	223.07	53124	1.60588
76	0.743	186.898	138	227	138.908	33081
77	0.743	286.91	221	340	213.24	50783	1.43735
78	0.743	199.61	165	234	148.356	35331
79	0.743	264.249	236	303	196.397	46772	1.45548
80	0.743	181.554	151	215	134.936	32135
81	0.743	316.757	255	380	235.423	56066	1.48602
82	0.743	213.158	163	253	158.426	37729
83	0.743	307.305	249	366	228.398	54393	1.49468
84	0.743	205.599	179	242	152.807	36391
85	0.743	317.734	260	402	236.15	56239	1.46414
86	0.743	217.011	177	259	161.289	38411
87	0.743	280.441	228	356	208.432	49638	1.4433
88	0.743	194.305	158	224	144.413	34392
89	0.743	352.017	269	426	261.63	62307	1.43956
90	0.743	244.531	200	303	181.743	43282
91	0.743	347.158	261	413	258.018	61447	1.39814
92	0.743	248.299	193	308	184.544	43949
93	0.743	281.633	241	334	209.318	49849	1.39449
94	0.743	201.96	161	241	150.103	35747
95	0.743	289.514	224	365	215.176	51244	1.53255
96	0.743	188.91	164	236	140.403	33437
97	0.743	331.559	216	389	246.425	58686	1.55069
98	0.743	213.814	177	251	158.913	37845
99	0.743	337.497	244	961	250.838	59737	1.82264
100	0.743	185.169	149	225	137.624	32775
101	0.743	295.362	241	377	219.522	52279	1.64622
102	0.743	179.418	149	226	133.349	31757
103	0.743	306.107	238	364	227.508	54181	1.54283
104	0.743	198.407	143	236	147.462	35118
105	0.743	315.249	235	519	234.302	55799	1.60841
106	0.743	196	151	244	145.673	34692
107	0.743	265.893	225	311	197.619	47063	1.42133
108	0.743	187.073	142	231	139.039	33112
109	0.743	295.395	248	355	219.547	52285	1.42164
110	0.743	207.785	176	245	154.432	36778
111	0.743	364.599	309	428	270.981	64534	1.65765
112	0.743	219.949	171	272	163.473	38931
113	0.743	350.52	264	651	260.517	62042	1.54399
114	0.743	227.023	190	260	168.73	40183
115	0.743	328.35	276	400	244.04	58118	1.90501
116	0.743	172.362	111	225	128.104	30508
117	0.743	317.395	265	386	235.898	56179	1.66906
118	0.743	190.164	128	229	141.335	33659
119	0.743	303.119	223	379	225.287	53652	1.52663
120	0.743	198.554	155	238	147.571	35144
121	0.743	280.695	217	326	208.621	49683	1.566
122	0.743	179.243	141	216	133.219	31726
123	0.743	288.831	250	348	214.668	51123	1.4236
124	0.743	202.887	174	252	150.792	35911
125	0.743	307.068	219	360	228.222	54351	1.49025
126	0.743	206.051	131	265	153.143	36471
127	0.743	251.023	210	296	186.568	44431	1.48281
128	0.743	169.288	137	199	125.82	29964
129	0.743	338.299	285	389	251.434	59879	1.6049
130	0.743	210.791	170	240	156.666	37310
131	0.743	313.124	265	370	232.723	55423	1.43952
132	0.743	217.52	186	262	161.667	38501
133	0.743	328.582	218	643	244.212	58159	1.70504
134	0.743	192.712	162	225	143.229	34110
135	0.743	266.492	204	313	198.065	47169	1.42699
136	0.743	186.751	133	232	138.799	33055
137	0.743	300.616	220	367	223.427	53209	1.49066
138	0.743	201.667	140	245	149.885	35695
139	0.743	318.571	184	477	236.771	56387	1.58151
140	0.743	201.435	174	239	149.713	35654
141	0.743	297.282	184	397	220.949	52619	1.41796
142	0.743	209.655	171	245	155.822	37109
143	0.743	290.322	240	348	215.776	51387	1.41453
144	0.743	205.243	154	246	152.543	36328
145	0.743	304.153	256	379	226.055	53835	1.70299
146	0.743	178.599	150	206	132.74	31612
147	0.743	313.407	213	515	232.933	55473	1.61748
148	0.743	193.763	168	227	144.01	34296
149	0.743	339.599	274	430	252.4	60109	1.58599
150	0.743	214.124	177	259	159.144	37900
151	0.743	323.322	236	412	240.303	57228	1.64123
152	0.743	197	150	241	146.416	34869
153	0.743	345.797	273	464	257.006	61206	1.74974
154	0.743	197.627	165	223	146.882	34980
155	0.743	266.712	233	310	198.228	47208	1.44239
156	0.743	184.91	148	231	137.43	32729
157	0.743	314.554	207	465	233.786	55676	1.57638
158	0.743	199.542	165	251	148.306	35319
159	0.743	272.542	217	336	202.562	48240	1.50061
160	0.743	181.621	159	214	134.987	32147
161	0.743	406.514	310	636	302.134	71953	1.77071
162	0.743	229.576	194	266	170.628	40635
163	0.743	284.266	239	348	211.275	50315	1.67689
164	0.743	169.52	135	207	125.992	30005
165	0.743	295.051	159	909	219.291	52224	1.6607
166	0.743	177.667	148	211	132.047	31447
167	0.743	303.718	171	1816	225.732	53758	1.78901
168	0.743	169.768	138	202	126.177	30049
169	0.743	342.977	157	963	254.911	60707	1.99931
170	0.743	171.548	142	212	127.5	30364
171	0.743	318.599	268	388	236.792	56392	1.59129
172	0.743	200.215	151	243	148.806	35438
173	0.743	281.977	210	474	209.574	49910	1.74218
174	0.743	161.853	126	197	120.294	28648
175	0.743	332.706	142	819	247.277	58889	1.53165
176	0.743	217.22	186	253	161.445	38448
177	0.743	291.701	245	347	216.801	51631	1.48664
178	0.743	196.215	165	234	145.833	34730
179	0.743	354.78	257	767	263.683	62796	1.55655
180	0.743	227.927	180	283	169.402	40343
181	0.743	358.373	253	695	266.354	63432	1.70713
182	0.743	209.927	179	243	156.024	37157
183	0.743	309.085	222	396	229.721	54708	1.47788
184	0.743	209.141	174	244	155.44	37018
185	0.743	290.107	177	471	215.617	51349	1.35393
186	0.743	214.271	180	254	159.253	37926
187	0.743	309.096	199	494	229.729	54710	1.40896
188	0.743	219.379	188	255	163.049	38830
189	0.743	307.045	203	489	228.205	54347	1.69
190	0.743	181.684	148	220	135.033	32158
191	0.743	377.768	181	725	280.769	66865	1.71085
192	0.743	220.808	187	275	164.111	39083
193	0.743	282.062	194	404	209.637	49925	1.39067
194	0.743	202.825	175	246	150.746	35900
195	0.743	326.621	275	368	242.755	57812	1.54573
196	0.743	211.305	151	261	157.048	37401
197	0.743	338.644	212	1030	251.69	59940	1.49906
198	0.743	225.904	189	280	167.899	39985
199	0.743	291.299	208	517	216.503	51560	1.63402
200	0.743	178.271	150	223	132.497	31554
201	0.743	234.446	188	270	174.248	41497	1.45742
202	0.743	160.864	139	183	119.559	28473
203	0.743	286.554	210	419	212.975	50720	1.68527
204	0.743	170.034	134	218	126.374	30096

## Sheet: Figure 1B WT 37C
	area	mean	Min	Max	IntDen	RawIntDen	Raw N/C
1	0.743	281.113	236	365	208.932	49757	1.44065
2	0.743	195.13	154	224	145.026	34538
3	0.743	289.017	244	340	214.806	51156	1.47679
4	0.743	195.706	164	229	145.455	34640
5	4.56	663.435	527	838	3024.97	117428	1.9242
6	4.56	344.785	254	474	1572.07	61027
7	4.56	643.367	444	815	2933.47	113876	1.67354
8	4.56	384.435	245	469	1752.86	68045
9	4.56	663.853	496	833	3026.88	117502	1.63846
10	4.56	405.169	319	511	1847.4	71715
11	4.56	760.751	558	967	3468.7	134653	1.68487
12	4.56	451.52	364	547	2058.73	79919
13	4.56	591.362	489	730	2696.35	104671	1.54464
14	4.56	382.847	290	497	1745.62	67764
15	4.56	650.853	439	798	2967.61	115201	1.48313
16	4.56	438.836	315	557	2000.9	77674
17	4.56	766.949	586	1027	3496.95	135750	1.54081
18	4.56	497.757	403	628	2269.55	88103
19	4.56	766.701	585	931	3495.82	135706	1.47712
20	4.56	519.051	412	639	2366.65	91872
21	4.56	681.237	513	837	3106.14	120579	1.72796
22	4.56	394.243	300	516	1797.58	69781
23	4.56	818.169	703	1038	3730.5	144816	1.73642
24	4.56	471.181	310	607	2148.38	83399
25	4.56	747.006	636	897	3406.02	132220	1.44457
26	4.56	517.113	425	655	2357.81	91529
27	4.56	733.497	584	935	3344.43	129829	1.73029
28	4.56	423.915	340	529	1932.87	75033
29	0.743	284.277	239	329	211.283	50317	1.43243
30	0.743	198.458	141	252	147.5	35127
31	0.743	256.446	226	315	190.599	45391	1.49313
32	0.743	171.751	139	205	127.651	30400
33	0.743	295.379	250	357	219.534	52282	1.39133
34	0.743	212.299	165	255	157.787	37577
35	0.743	267.011	230	311	198.451	47261	1.51512
36	0.743	176.232	137	215	130.981	31193
37	0.743	251.836	204	291	187.172	44575	1.44316
38	0.743	174.503	141	212	129.696	30887
39	0.743	267.898	215	327	199.11	47418	1.48655
40	0.743	180.215	150	207	133.941	31898
41	0.743	278.203	230	355	206.769	49242	1.48016
42	0.743	187.955	151	228	139.694	33268
43	0.743	242.277	201	305	180.067	42883	1.60514
44	0.743	150.938	126	173	112.182	26716
45	0.743	287.921	247	368	213.991	50962	1.4207
46	0.743	202.661	172	239	150.624	35871
47	0.743	282.531	199	803	209.986	50008	1.42246
48	0.743	198.621	172	237	147.621	35156
49	0.743	292.768	241	348	217.594	51820	1.47367
50	0.743	198.667	159	243	147.655	35164
51	0.743	247.718	210	317	184.111	43846	1.54802
52	0.743	160.023	123	190	118.934	28324
53	0.743	278	233	367	206.618	49206	1.55302
54	0.743	179.006	139	213	133.042	31684
55	0.743	256.661	191	400	190.758	45429	1.49891
56	0.743	171.232	141	219	127.265	30308
57	0.743	290.226	245	338	215.705	51370	1.45627
58	0.743	199.294	163	230	148.121	35275
59	0.743	262.051	221	313	194.764	46383	1.45584
60	0.743	180	151	212	133.781	31860
61	0.743	277.09	238	321	205.942	49045	1.50833
62	0.743	183.706	147	227	136.536	32516
63	0.743	300.158	218	577	223.087	53128	1.67153
64	0.743	179.571	154	214	133.462	31784
65	0.743	271.514	212	325	201.797	48058	1.46496
66	0.743	185.339	135	223	137.75	32805
67	0.743	290.87	224	423	216.183	51484	1.55433
68	0.743	187.136	154	237	139.085	33123
69	0.743	398.39	253	630	296.095	70515	1.79345
70	0.743	222.136	186	256	165.098	39318
71	0.743	332.209	278	436	246.908	58801	1.72028
72	0.743	193.113	163	222	143.527	34181
73	0.743	278.927	236	346	207.307	49370	1.63342
74	0.743	170.763	137	208	126.916	30225
75	0.743	326.147	252	457	242.402	57728	1.69206
76	0.743	192.751	169	219	143.259	34117
77	0.743	295.198	247	358	219.4	52250	1.52948
78	0.743	193.006	166	231	143.448	34162
79	0.743	236.847	199	285	176.032	41922	1.45089
80	0.743	163.243	135	191	121.327	28894
81	0.743	237.61	186	326	176.599	42057	1.43392
82	0.743	165.706	133	190	123.158	29330
83	0.743	277.61	228	354	206.328	49137	1.46603
84	0.743	189.362	145	227	140.739	33517
85	0.743	366.525	294	494	272.413	64875	1.57601
86	0.743	232.565	171	279	172.849	41164
87	0.743	289.045	224	591	214.827	51161	1.47992
88	0.743	195.311	161	241	145.161	34570
89	0.743	306.011	247	428	227.437	54164	1.51351
90	0.743	202.186	163	254	150.271	35787
91	0.743	272.927	212	334	202.847	48308	1.58548
92	0.743	172.141	142	215	127.941	30469
93	0.743	278.412	235	323	206.924	49279	1.46242
94	0.743	190.379	135	233	141.495	33697
95	0.743	257.633	214	358	191.48	45601	1.4576
96	0.743	176.751	117	218	131.367	31285
97	0.743	272.751	223	323	202.717	48277	1.40918
98	0.743	193.554	158	235	143.855	34259
99	0.743	272.514	195	386	202.541	48235	1.69329
100	0.743	160.938	92	197	119.614	28486
101	0.743	287.452	186	358	213.643	50879	1.39613
102	0.743	205.893	163	236	153.026	36443
103	0.743	264.542	228	308	196.616	46824	1.42543
104	0.743	185.588	163	209	137.934	32849
105	0.743	243.825	192	303	181.218	43157	1.40673
106	0.743	173.328	125	209	128.822	30679
107	0.743	249.356	188	385	185.329	44136	1.61222
108	0.743	154.667	129	184	114.953	27376
109	0.743	275.107	126	1157	204.468	48694	1.64919
110	0.743	166.814	134	203	123.981	29526
111	0.743	245.695	216	277	182.608	43488	1.4361
112	0.743	171.085	143	198	127.155	30282
113	0.743	236.328	181	283	175.646	41830	1.45395
114	0.743	162.542	115	204	120.806	28770
115	0.743	228.853	188	274	170.091	40507	1.45861
116	0.743	156.898	117	203	116.612	27771
117	0.743	247.605	177	341	184.027	43826	1.51537
118	0.743	163.395	137	196	121.44	28921
119	0.743	389.328	292	698	289.36	68911	1.89717
120	0.743	205.215	171	245	152.522	36323
121	0.743	335.356	247	652	249.247	59358	1.74387
122	0.743	192.305	155	237	142.927	34038
123	0.743	312.893	273	362	232.551	55382	1.48641
124	0.743	210.503	172	270	156.452	37259
125	0.743	323.277	251	442	240.269	57220	1.77509
126	0.743	182.119	141	217	135.356	32235
127	0.743	460.26	300	1078	342.079	81466	2.05852
128	0.743	223.588	188	259	166.177	39575
129	0.743	310.186	273	362	230.54	54903	1.45454
130	0.743	213.254	171	259	158.497	37746
131	0.743	243.949	211	279	181.31	43179	1.40114
132	0.743	174.107	141	207	129.402	30817
133	0.743	255.729	221	306	190.065	45264	1.56083
134	0.743	163.842	121	208	121.772	29000
135	0.743	262.226	222	296	194.894	46414	1.47057
136	0.743	178.316	151	204	132.53	31562
137	0.743	274.531	209	316	204.04	48592	1.4154
138	0.743	193.96	146	227	144.157	34331
139	0.743	286.13	162	433	212.66	50645	1.51179
140	0.743	189.266	160	227	140.668	33500
141	0.743	287.345	234	355	213.563	50860	1.59171
142	0.743	180.525	154	227	134.172	31953
143	0.743	245.989	202	290	182.826	43540	1.5243
144	0.743	161.379	124	200	119.941	28564
145	0.743	257.774	197	409	191.585	45626	1.52407
146	0.743	169.136	125	218	125.707	29937
147	0.743	288.582	229	354	214.483	51079	1.44043
148	0.743	200.345	173	239	148.902	35461
149	0.743	277.328	209	432	206.118	49087	1.69505
150	0.743	163.61	136	203	121.6	28959
151	0.743	360.22	233	855	267.727	63759	1.81862
152	0.743	198.073	171	230	147.214	35059
153	0.743	347.938	241	614	258.598	61585	1.80744
154	0.743	192.503	159	225	143.074	34073
155	0.743	306.119	238	405	227.517	54183	1.50525
156	0.743	203.367	171	241	151.149	35996
157	0.743	237.859	190	285	176.784	42101	1.43631
158	0.743	165.605	139	195	123.082	29312
159	0.743	295.102	253	355	219.328	52233	1.57461
160	0.743	187.412	155	230	139.291	33172
161	0.743	282.209	225	368	209.746	49951	1.53994
162	0.743	183.26	150	216	136.204	32437
163	0.743	250.26	211	289	186.001	44296	1.52661
164	0.743	163.932	123	196	121.839	29016
165	0.743	248.87	208	299	184.968	44050	1.42714
166	0.743	174.384	123	205	129.608	30866
167	0.743	252.158	199	297	187.412	44632	1.46325
168	0.743	172.328	135	216	128.079	30502
169	0.743	232.847	199	278	173.059	41214	1.48018
170	0.743	157.311	124	197	116.918	27844
171	0.743	227.316	192	264	168.948	40235	1.41503
172	0.743	160.644	127	185	119.396	28434
173	0.743	254.401	211	290	189.079	45029	1.45909
174	0.743	174.356	145	229	129.587	30861
175	0.743	294.062	244	421	218.556	52049	1.5199
176	0.743	193.475	162	234	143.796	34245
177	0.743	247.797	215	280	184.17	43860	1.41211
178	0.743	175.48	145	210	130.422	31060
179	0.743	251.282	213	288	186.761	44477	1.61552
180	0.743	155.542	122	184	115.604	27531
181	0.743	249.441	198	293	185.392	44151	1.53286
182	0.743	162.729	127	208	120.945	28803
183	0.743	265.209	223	308	197.111	46942	1.46698
184	0.743	180.785	142	213	134.365	31999
185	0.743	287.107	229	348	213.387	50818	1.55984
186	0.743	184.062	148	214	136.801	32579
187	0.743	287.757	236	334	213.87	50933	1.48346
188	0.743	193.977	159	234	144.17	34334
189	0.743	291.475	228	410	216.633	51591	1.62415
190	0.743	179.463	136	220	133.383	31765
191	0.743	307.209	219	533	228.327	54376	1.75718
192	0.743	174.831	141	219	129.939	30945
193	0.743	248.141	213	295	184.426	43921	1.46521
194	0.743	169.356	128	203	125.87	29976
195	0.743	259.113	195	312	192.581	45863	1.5606
196	0.743	166.034	129	204	123.401	29388
197	0.743	255.011	217	316	189.532	45137	1.6861
198	0.743	151.243	121	187	112.408	26770
199	0.743	252.78	214	301	187.873	44742	1.47566
200	0.743	171.299	135	223	127.315	30320
201	0.743	254.401	207	310	189.079	45029	1.56525
202	0.743	162.531	134	195	120.798	28768
203	0.743	251.056	200	293	186.593	44437	1.52025
204	0.743	165.141	135	199	122.738	29230
205	0.743	272.701	236	345	202.679	48268	1.69385
206	0.743	160.994	132	193	119.656	28496
207	0.743	344.977	225	557	256.398	61061	1.86708
208	0.743	184.768	142	217	137.325	32704
209	0.743	371.192	250	624	275.881	65701	1.8319
210	0.743	202.627	177	235	150.599	35865
211	0.743	282.051	214	398	209.629	49923	1.62929
212	0.743	173.113	137	215	128.663	30641
213	0.743	317.401	229	481	235.902	56180	1.64591
214	0.743	192.842	162	226	143.326	34133
215	0.743	305.051	228	799	226.723	53994	1.65962
216	0.743	183.808	154	222	136.612	32534

## Sheet: Figure 1B mtr1-1 RT
	area	Min	Max	IntDen	RawIntDen	Raw N/C
1	1.777	982	1915	2543.26	98728	1.61315
2	1.777	704	1086	1576.58	61202
3	1.777	460	2424	2256.55	87598	1.67035
4	1.777	651	929	1350.94	52443
5	1.777	588	1747	2107.55	81814	1.55469
6	1.777	661	888	1355.61	52624
7	1.777	1610	2789	3862.36	149935	1.83333
8	1.777	955	1391	2106.75	81783
9	1.777	1258	2428	3103.59	120480	1.7544
10	1.777	809	1301	1769.03	68673
11	1.777	296	2763	1825.04	70847	1.72297
12	1.777	492	742	1059.24	41119
13	1.777	730	1068	1568.21	60877	1.70185
14	1.777	473	593	921.47	35771
15	1.777	874	1298	1928.34	74857	1.54644
16	1.777	624	799	1246.95	48406
17	1.777	742	932	1518.64	58953	1.51026
18	1.777	495	654	1005.55	39035
19	1.777	697	890	1441.57	55961	1.61252
20	1.777	417	559	893.984	34704
21	1.777	795	915	1527.04	59279	1.69791
22	1.777	446	579	899.368	34913
23	1.777	829	1126	1664.65	64621	1.72696
24	1.777	478	635	963.923	37419
25	1.777	762	1236	1628.36	63212	1.60441
26	1.777	495	644	1014.93	39399
27	1.777	674	779	1285.49	49902	1.76444
28	1.777	352	471	728.551	28282
29	1.777	564	721	1125.05	43674	1.48845
30	1.777	373	495	755.857	29342
31	1.777	657	815	1305.89	50694	1.61153
32	1.777	389	509	810.34	31457
33	0.743	232	337	204.275	48648	1.52106
34	0.743	159	216	134.298	31983
35	0.743	229	303	200.009	47632	1.56813
36	0.743	131	219	127.546	30375
37	0.743	209	286	183.771	43765	1.42487
38	0.743	134	212	128.974	30715
39	0.743	235	349	214.029	50971	1.59404
40	0.743	144	211	134.269	31976
41	0.743	207	301	185.757	44238	1.45663
42	0.743	143	194	127.525	30370
43	0.743	241	332	203.007	48346	1.59542
44	0.743	136	209	127.244	30303
45	0.743	197	268	173.278	41266	1.4406
46	0.743	135	200	120.282	28645
47	0.743	201	270	170.607	40630	1.39507
48	0.743	132	201	122.293	29124
49	0.743	257	407	234.395	55821	1.83176
50	0.743	140	221	127.962	30474
51	0.743	221	309	196.523	46802	1.74368
52	0.743	105	223	112.706	26841
53	0.743	198	310	181.831	43303	1.4444
54	0.743	143	196	125.887	29980
55	0.743	215	299	186.975	44528	1.54611
56	0.743	134	200	120.932	28800
57	0.743	209	287	184.342	43901	1.50925
58	0.743	129	201	122.142	29088
59	0.743	250	353	215.02	51207	1.42909
60	0.743	163	253	150.46	35832
61	0.743	256	393	230.565	54909	1.48206
62	0.743	176	235	155.57	37049
63	0.743	229	321	207.181	49340	1.44185
64	0.743	166	223	143.691	34220
65	0.743	214	286	184.77	44003	1.31872
66	0.743	151	226	140.114	33368
67	0.743	256	423	242.629	57782	1.80778
68	0.743	152	215	134.214	31963
69	0.743	273	765	280.546	66812	1.96477
70	0.743	160	227	142.788	34005
71	0.743	216	363	202.872	48314	1.79353
72	0.743	130	182	113.114	26938
73	0.743	217	355	200.844	47831	1.56055
74	0.743	130	204	128.701	30650
75	0.743	221	321	202.99	48342	1.6831
76	0.743	115	201	120.605	28722
77	0.743	244	343	204.027	48589	1.48891
78	0.743	156	223	137.031	32634
79	0.743	221	326	205.404	48917	1.57007
80	0.743	137	226	130.825	31156
81	0.743	195	335	198.241	47211	1.44288
82	0.743	143	222	137.393	32720
83	0.743	255	348	218.589	52057	1.60166
84	0.743	144	219	136.477	32502
85	0.743	205	461	204.791	48771	1.59429
86	0.743	142	208	128.453	30591
87	0.743	274	485	250.926	59758	1.52172
88	0.743	176	285	164.896	39270
89	0.743	304	423	267.449	63693	1.61555
90	0.743	177	263	165.547	39425
91	0.743	324	427	276.389	65822	1.66533
92	0.743	175	273	165.967	39525
93	0.743	282	385	245.703	58514	1.62616
94	0.743	146	247	151.094	35983
95	0.743	222	294	190.809	45441	1.45658
96	0.743	149	205	130.997	31197
97	0.743	226	292	192.971	45956	1.65084
98	0.743	121	198	116.893	27838
99	0.743	209	315	194.575	46338	1.55471
100	0.743	136	203	125.152	29805
101	0.743	247	470	219.114	52182	1.48379
102	0.743	169	224	147.672	35168
103	0.743	253	326	212.207	50537	1.48424
104	0.743	169	234	142.973	34049
105	0.743	287	434	255.449	60835	1.53729
106	0.743	178	262	166.169	39573
107	0.743	254	355	215.923	51422	1.63224
108	0.743	149	212	132.287	31504
109	0.743	209	270	176.889	42126	1.55814
110	0.743	121	195	113.525	27036
111	0.743	221	311	201.109	47894	1.52894
112	0.743	135	213	131.535	31325
113	0.743	208	344	201.516	47991	1.57482
114	0.743	140	211	127.962	30474
115	0.743	202	279	175.444	41782	1.48987
116	0.743	103	191	117.758	28044
117	0.743	202	292	187.172	44575	1.39476
118	0.743	148	220	134.197	31959
119	0.743	208	312	198.002	47154	1.46865
120	0.743	156	210	134.819	32107
121	0.743	274	366	233.836	55688	1.81512
122	0.743	147	213	128.827	30680
123	0.743	217	299	190.578	45386	1.55474
124	0.743	138	198	122.578	29192
125	0.743	194	418	192.476	45838	1.53371
126	0.743	136	197	125.497	29887
127	0.743	253	463	228.869	54505	1.78098
128	0.743	133	208	128.507	30604
129	0.743	268	394	238.997	56917	1.83408
130	0.743	146	202	130.309	31033
131	0.743	191	278	174.13	41469	1.41022
132	0.743	138	195	123.477	29406
133	0.743	216	296	186.828	44493	1.46982
134	0.743	124	207	127.109	30271
135	0.743	200	282	177.615	42299	1.55734
136	0.743	124	192	114.05	27161
137	0.743	213	353	196.532	46804	1.65678
138	0.743	135	204	118.623	28250
139	0.743	181	340	175.205	41725	1.47085
140	0.743	125	200	119.118	28368
141	0.743	181	304	174.487	41554	1.52924
142	0.743	123	202	114.101	27173
143	0.743	296	426	259.845	61882	1.91906
144	0.743	142	236	135.402	32246
145	0.743	204	307	196.964	46907	1.65358
146	0.743	135	192	119.114	28367
147	0.743	240	325	203.225	48398	1.59167
148	0.743	128	205	127.68	30407
149	0.743	210	318	189.872	45218	1.43326
150	0.743	148	218	132.476	31549
151	0.743	201	296	183.359	43667	1.5635
152	0.743	132	178	117.275	27929
153	0.743	187	292	177.876	42361	1.44834
154	0.743	140	201	122.814	29248
155	0.743	170	255	159.538	37994	1.46633
156	0.743	114	185	108.801	25911
157	0.743	192	438	205.778	49006	1.51375
158	0.743	146	217	135.94	32374
159	0.743	192	264	165.925	39515	1.5074
160	0.743	126	178	110.074	26214
161	0.743	187	261	164.581	39195	1.46076
162	0.743	128	172	112.669	26832
163	0.743	218	310	192.568	45860	1.42171
164	0.743	157	216	135.448	32257
165	0.743	213	347	188.961	45001	1.59748
166	0.743	129	191	118.287	28170
167	0.743	204	338	184.678	43981	1.43823
168	0.743	133	211	128.407	30580
169	0.743	213	312	187.794	44723	1.52352
170	0.743	134	196	123.263	29355
171	0.743	187	326	177.808	42345	1.48272
172	0.743	124	185	119.92	28559
173	0.743	197	327	188.319	44848	1.55506
174	0.743	132	212	121.1	28840
175	0.743	243	349	212.501	50607	1.51264
176	0.743	141	235	140.483	33456
177	0.743	239	316	204.246	48641	1.51662
178	0.743	137	223	134.672	32072
179	0.743	232	306	200.508	47751	1.58373
180	0.743	116	206	126.605	30151
181	0.743	212	281	185.056	44071	1.56347
182	0.743	109	193	118.363	28188
183	0.743	169	295	163.393	38912	1.48491
184	0.743	121	172	110.036	26205
185	0.743	231	451	215.331	51281	1.73687
186	0.743	109	203	123.977	29525
187	0.743	294	394	248.634	59212	1.68777
188	0.743	143	246	147.315	35083
189	0.743	225	312	206.194	49105	1.52804
190	0.743	146	213	134.94	32136
191	0.743	229	319	206.614	49205	1.63228
192	0.743	145	205	126.58	30145
193	0.743	237	325	202.692	48271	1.5996
194	0.743	145	227	126.714	30177
195	0.743	230	316	197.75	47094	1.50821
196	0.743	143	235	131.115	31225
197	0.743	222	377	204.938	48806	1.64952
198	0.743	133	203	124.241	29588
199	0.743	245	346	213.311	50800	1.6948
200	0.743	144	205	125.862	29974

## Sheet: Figure 1B mtr1-1 37C
	area	Min	Max	IntDen	RawIntDen	Raw N/C
1	1.777	522	824	1118.79	43431	0.991734
2	1.777	495	738	1128.12	43793
3	1.777	284	470	663.636	25762	0.827296
4	1.777	346	643	802.174	31140
5	1.777	530	780	1182.86	45918	1.17588
6	1.777	420	764	1005.94	39050
7	1.777	460	676	933.758	36248	1.09916
8	1.777	336	610	849.522	32978
9	1.777	399	668	939.064	36454	1.12672
10	1.777	371	598	833.447	32354
11	1.777	443	717	1011.42	39263	0.96247
12	1.777	442	747	1050.86	40794
13	1.777	406	643	915.519	35540	1.2388
14	1.777	304	522	739.036	28689
15	1.777	326	491	713.713	27706	1.14369
16	1.777	300	426	624.042	24225
17	1.777	466	687	1009.49	39188	1.12354
18	1.777	406	577	898.492	34879
19	1.777	301	627	759.129	29469	1.11828
20	1.777	239	544	678.834	26352
21	1.777	394	685	883.19	34285	1.06264
22	1.777	346	563	831.129	32264
23	1.777	408	623	916.009	35559	1.26513
24	1.777	336	487	724.043	28107
25	1.777	479	683	1035.2	40186	1.28534
26	1.777	334	614	805.394	31265
27	1.777	450	715	1055.78	40985	1.11563
28	1.777	393	702	946.354	36737
29	1.777	318	549	757.403	29402	0.995126
30	1.777	342	499	761.112	29546
31	1.777	454	621	968.895	37612	1.1918
32	1.777	349	568	812.968	31559
33	1.777	621	960	1415.27	54940	0.986993
34	1.777	680	896	1433.92	55664
35	1.777	475	744	1070.34	41550	1.09935
36	1.777	428	655	973.609	37795
37	1.777	385	582	876.003	34006	1.06947
38	1.777	270	577	819.099	31797
39	1.777	314	535	769.381	29867	1.2906
40	1.777	257	419	596.144	23142
41	1.777	424	674	935.767	36326	1.22199
42	1.777	330	498	765.775	29727
43	1.777	619	877	1280.34	49702	1.18811
44	1.777	472	705	1077.63	41833
45	1.777	464	784	1105.4	42911	1.27227
46	1.777	231	655	868.842	33728
47	1.777	523	832	1214.7	47154	1.2473
48	1.777	380	644	973.866	37805
49	1.777	459	684	1022.01	39674	1.19536
50	1.777	386	592	854.983	33190
51	1.777	434	744	1002.72	38925	1.09955
52	1.777	382	593	911.939	35401
53	1.777	678	1401	1780.99	69137	0.999248
54	1.777	858	1221	1782.33	69189
55	1.777	502	782	1103.75	42847	1.12033
56	1.777	443	928	985.201	38245
57	1.777	328	540	743.08	28846	1.0743
58	1.777	304	495	691.689	26851
59	1.777	410	565	875.617	33991	0.962918
60	1.777	448	634	909.337	35300
61	1.777	445	634	938.652	36438	0.994677
62	1.777	389	667	943.675	36633
63	1.777	506	706	1030.92	40020	1.13435
64	1.777	405	652	908.822	35280
65	1.777	442	627	924.226	35878	1.12679
66	1.777	392	571	820.232	31841
67	1.777	400	669	901.583	34999	1.1904
68	1.777	305	530	757.377	29401
69	1.777	422	663	917.58	35620	1.12419
70	1.777	376	541	816.214	31685
71	1.777	412	598	882.83	34271	1.18143
72	1.777	325	561	747.253	29008
73	1.777	418	692	986.978	38314	1.12302
74	1.777	388	623	878.862	34117
75	1.777	426	637	940.146	36496	1.23892
76	1.777	324	534	758.845	29458
77	1.777	300	567	750.628	29139	0.839499
78	1.777	399	657	894.138	34710
79	1.777	408	624	944.783	36676	1.22625
80	1.777	306	544	770.463	29909
81	1.777	551	796	1164.93	45222	1.14815
82	1.777	489	712	1014.62	39387
83	1.777	428	648	939.837	36484	1.30847
84	1.777	356	529	718.273	27883
85	1.777	303	443	680.586	26420	1.16537
86	1.777	264	410	584.011	22671
87	1.777	479	767	1072.17	41621	1.2786
88	1.777	306	570	838.548	32552
89	1.777	606	826	1291.23	50125	1.27938
90	1.777	459	742	1009.26	39179
91	1.777	477	633	973.196	37779	1.20924
92	1.777	368	530	804.802	31242
93	1.777	473	737	1036.44	40234	1.44074
94	1.777	307	478	719.381	27926
95	1.777	414	734	1035.92	40214	1.24536
96	1.777	361	567	831.824	32291
97	1.777	534	678	1066.19	41389	1.11702
98	1.777	365	697	954.495	37053
99	1.777	534	778	1145.92	44484	1.34328
100	1.777	414	621	853.076	33116
101	1.777	555	789	1170.29	45430	1.45707
102	1.777	311	577	803.179	31179
103	1.777	356	512	767.063	29777	1.0198
104	1.777	323	491	752.174	29199
105	0.743	133	199	124.35	29614	1.02432
106	0.743	136	203	121.398	28911
107	0.743	137	210	123.422	29393	1.00075
108	0.743	145	196	123.33	29371
109	0.743	137	225	135.301	32222	1.02328
110	0.743	149	203	132.224	31489
111	0.743	157	232	142.112	33844	1.13047
112	0.743	139	196	125.711	29938
113	0.743	141	203	122.616	29201	1.06608
114	0.743	129	183	115.016	27391
115	0.743	157	205	131.749	31376	1.06194
116	0.743	146	195	124.065	29546
117	0.743	160	230	142.394	33911	1.05622
118	0.743	145	224	134.814	32106
119	0.743	142	212	128.797	30673	1.12947
120	0.743	124	202	114.033	27157
121	0.743	139	186	118.782	28288	0.966913
122	0.743	135	190	122.847	29256
123	0.743	117	172	107.466	25593	1.09997
124	0.743	107	161	97.699	23267
125	0.743	158	234	141.411	33677	1.16517
126	0.743	136	191	121.365	28903
127	0.743	147	227	139.446	33209	1.16453
128	0.743	134	191	119.744	28517
129	0.743	155	248	149.196	35531	1.07843
130	0.743	140	254	138.346	32947
131	0.743	134	210	122.024	29060	1.03738
132	0.743	131	187	117.628	28013
133	0.743	144	199	125.925	29989	1.04136
134	0.743	132	186	120.924	28798
135	0.743	131	204	127.071	30262	1.01625
136	0.743	136	200	125.039	29778
137	0.743	145	210	129.15	30757	1.04152
138	0.743	144	204	124.002	29531
139	0.743	139	226	131.027	31204	1.10001
140	0.743	126	186	119.114	28367
141	0.743	140	203	128.151	30519	0.992488
142	0.743	123	212	129.12	30750
143	0.743	142	194	124.346	29613	1.1217
144	0.743	122	175	110.855	26400
145	0.743	138	196	123.561	29426	1.00519
146	0.743	130	203	122.923	29274
147	0.743	149	224	136.145	32423	1.05968
148	0.743	142	206	128.478	30597
149	0.743	166	222	141.331	33658	0.990291
150	0.743	159	230	142.717	33988
151	0.743	172	251	150.183	35766	1.08877
152	0.743	149	212	137.938	32850
153	0.743	156	228	138.153	32901	1.15702
154	0.743	127	204	119.404	28436
155	0.743	149	216	135.457	32259	1.03753
156	0.743	149	212	130.557	31092
157	0.743	152	221	139.53	33229	1.04757
158	0.743	155	216	133.194	31720
159	0.743	173	222	146.282	34837	1.07287
160	0.743	160	217	136.347	32471
161	0.743	171	254	155.281	36980	1.17692
162	0.743	146	203	131.938	31421
163	0.743	147	212	135.499	32269	1.08708
164	0.743	141	203	124.644	29684
165	0.743	142	210	128.268	30547	1.07058
166	0.743	137	185	119.811	28533
167	0.743	137	205	125.732	29943	0.99571
168	0.743	147	198	126.274	30072
169	0.743	160	246	152.53	36325	1.13346
170	0.743	145	206	134.571	32048
171	0.743	164	240	140.697	33507	1.03449
172	0.743	157	210	136.007	32390
173	0.743	151	227	136.872	32596	1.04011
174	0.743	154	206	131.594	31339
175	0.743	143	196	125.346	29851	1.06958
176	0.743	121	193	117.191	27909
177	0.743	150	209	131.501	31317	0.996183
178	0.743	152	206	132.005	31437
179	0.743	150	213	134	31912	1.00327
180	0.743	148	204	133.563	31808
181	0.743	132	194	122.31	29128	1.03412
182	0.743	131	190	118.274	28167
183	0.743	127	199	117.636	28015	1.00959
184	0.743	126	186	116.519	27749
185	0.743	130	188	116.784	27812	1.02014
186	0.743	131	191	114.478	27263
187	0.743	133	192	118.489	28218	1.03911
188	0.743	128	181	114.029	27156
189	0.743	128	191	120.962	28807	1.07633
190	0.743	127	185	112.383	26764
191	0.743	135	187	117.061	27878	1.03084
192	0.743	124	194	113.559	27044
193	0.743	137	209	132.744	31613	1.07575
194	0.743	141	192	123.397	29387
195	0.743	150	215	130.871	31167	1.09262
196	0.743	128	192	119.778	28525
197	0.743	152	211	133.185	31718	1.07413
198	0.743	132	195	123.993	29529
199	0.743	147	198	125.694	29934	1.0282
200	0.743	135	196	122.247	29113
201	0.743	142	210	129.183	30765	1.07274
202	0.743	135	188	120.424	28679
203	0.743	119	182	110.141	26230	1.00974
204	0.743	122	181	109.078	25977
205	0.743	126	177	112.173	26714	1.07298
206	0.743	117	167	104.544	24897
207	0.743	135	194	123.926	29513	1.03052
208	0.743	129	194	120.256	28639
209	0.743	152	214	135.889	32362	1.12799
210	0.743	137	202	120.47	28690
