# Supplementary material for: Kap-β2/Transportin mediates β-catenin nuclear transport in Wnt signaling
Source: eLife. 2022 Oct 27;11:e70495. doi: 10.7554/eLife.70495 (PMC9665845; doi:10.7554/eLife.70495)
Supplement: Figure 2—figure supplement 2—source data 1. [file elife-70495-fig2-figsupp2-data1.xlsx]

## Sheet: Figure 2-supp 1A WT RT
	area	Min	Max	IntDen	RawIntDen	Raw N/C
1	0.976	848	975	879.236	87381	1.49079
2	0.976	459	707	589.78	58614
3	0.976	1023	1264	1092.07	108533	1.38883
4	0.976	573	895	786.323	78147
5	0.976	1120	1320	1191.61	118426	1.55586
6	0.976	561	1001	765.887	76116
7	0.976	932	1098	995.373	98923	1.33881
8	0.976	705	881	743.478	73889
9	0.976	1134	1376	1211.6	120412	1.30645
10	0.976	857	1070	927.393	92167
11	0.976	812	979	854.524	84925	1.47429
12	0.976	525	670	579.617	57604
13	0.976	1343	1502	1392.41	138382	1.57819
14	0.976	626	1149	882.285	87684
15	0.976	869	1022	912.099	90647	1.37527
16	0.976	542	789	663.213	65912
17	0.976	1002	1230	1104.75	109793	1.50021
18	0.976	612	868	736.395	73185
19	0.976	845	1003	904.733	89915	1.40888
20	0.976	568	721	642.163	63820
21	0.976	839	1069	929.265	92353	1.45065
22	0.976	561	751	640.583	63663
23	0.976	789	968	879.216	87379	1.37965
24	0.976	578	770	637.273	63334
25	0.976	1116	1315	1185.5	117818	1.45957
26	0.976	638	967	812.222	80721
27	0.976	763	955	848.325	84309	1.54449
28	0.976	462	652	549.26	54587
29	0.976	953	1110	1005.96	99975	1.48518
30	0.976	482	830	677.33	67315
31	0.976	969	1163	1024.17	101785	1.59999
32	0.976	555	714	640.11	63616
33	0.976	825	966	870.935	86556	1.40913
34	0.976	508	715	618.064	61425
35	0.976	1409	1611	1465	145596	1.58379
36	0.976	634	1130	924.998	91929
37	0.976	928	1109	1008.76	100254	1.47737
38	0.976	626	805	682.814	67860
39	0.976	892	1113	990.955	98484	1.2424
40	0.976	667	932	797.612	79269
41	0.976	901	1061	960.035	95411	1.4279
42	0.976	516	757	672.339	66819
43	0.976	955	1223	1064.79	105822	1.38465
44	0.976	716	871	768.996	76425
45	0.976	873	1014	918.418	91275	1.51446
46	0.976	528	692	606.432	60269
47	0.976	849	1010	901.77	89616	1.32076
48	0.976	597	765	682.767	67852
49	0.976	908	1127	1000.61	99438	1.41141
50	0.976	528	823	708.94	70453
51	0.976	986	1211	1070.37	106371	1.31987
52	0.976	626	958	810.965	80592
53	0.976	1187	1488	1262.84	125498	1.50216
54	0.976	684	1104	840.68	83545
55	0.976	816	984	872.92	86749	1.34355
56	0.976	549	755	649.712	64567
57	0.976	1065	1218	1112.04	110512	1.43353
58	0.976	621	906	775.736	77091
59	0.976	1009	1191	1055.21	104865	1.42223
60	0.976	543	866	741.946	73733
61	0.976	1526	1924	1673.53	166320	1.53805
62	0.976	932	1238	1088.09	108137
63	0.976	865	975	894.701	88918	1.33983
64	0.976	568	777	667.771	66365
65	0.976	1000	1227	1090.54	108381	1.52161
66	0.976	578	841	716.703	71228
67	0.976	927	1074	986.659	98057	1.3196
68	0.976	566	884	747.694	74308
69	0.976	1068	1250	1122.45	111552	1.60898
70	0.976	600	857	697.615	69331
71	0.976	864	1075	934.064	92830	1.52016
72	0.976	545	754	614.452	61066
73	0.976	874	1104	992.173	98605	1.31524
74	0.976	663	869	754.365	74971
75	0.976	908	1107	985.602	97952	1.30524
76	0.976	639	843	755.11	75045
77	0.976	813	985	860.158	85485	1.3111
78	0.976	621	771	656.059	65201
79	0.976	918	1074	976.476	97045	1.71264
80	0.976	462	740	570.159	56664
81	0.976	978	1155	1024.14	101782	1.77222
82	0.976	482	721	577.886	57432
83	0.976	838	1028	898.797	89325	1.3419
84	0.976	523	765	669.793	66566
85	0.976	928	1095	992.274	98615	1.44035
86	0.976	517	862	688.911	68466
87	0.976	1003	1170	1063.72	105716	1.40853
88	0.976	654	900	755.201	75054
89	0.976	751	998	877.626	87221	1.49502
90	0.976	481	739	587.033	58341
91	0.976	836	1008	891.492	88599	1.54174
92	0.976	527	664	578.238	57467
93	0.976	1041	1217	1093.83	108708	1.46038
94	0.976	628	841	749.002	74438
95	0.976	1048	1224	1109.82	110297	1.42077
96	0.976	687	889	781.141	77632
97	0.976	1069	1312	1167.12	115992	1.3559
98	0.976	727	988	860.772	85546
99	0.976	1084	1263	1149.57	114248	1.50074
100	0.976	688	858	766.007	76128
101	0.976	1112	1296	1166.49	115929	1.40151
102	0.976	721	950	832.306	82717
103	0.976	1109	1318	1201.93	119451	1.42183
104	0.976	763	943	845.337	84012
105	0.743	442	657	423.729	100911	1.6552
106	0.743	202	450	255.999	60966
107	0.743	385	630	384.363	91536	1.49434
108	0.743	239	463	257.212	61255
109	0.743	469	605	394.323	93908	1.45088
110	0.743	318	418	271.783	64725
111	0.743	358	481	315.549	75148	1.53627
112	0.743	231	320	205.4	48916
113	0.743	430	579	375.81	89499	1.45373
114	0.743	268	418	258.514	61565
115	0.743	346	469	302.385	72013	1.53811
116	0.743	193	328	196.595	46819
117	0.743	354	532	325.69	77563	1.45257
118	0.743	228	367	224.216	53397
119	0.743	388	559	356.86	84986	1.54419
120	0.743	242	411	231.098	55036
121	0.743	366	496	316.902	75470	1.40968
122	0.743	191	370	224.804	53537
123	0.743	377	507	329.381	78442	1.56044
124	0.743	233	359	211.082	50269
125	0.743	407	513	349.335	83194	1.51883
126	0.743	214	409	230.002	54775
127	0.743	456	660	413.353	98440	1.45104
128	0.743	260	477	284.867	67841
129	0.743	333	422	279.303	66516	1.31268
130	0.743	244	332	212.774	50672
131	0.743	483	612	403.288	96043	1.77025
132	0.743	237	363	227.815	54254
133	0.743	400	502	332.581	79204	1.43001
134	0.743	231	374	232.572	55387
135	0.743	419	526	353.143	84101	1.57469
136	0.743	243	378	224.262	53408
137	0.743	345	425	287.286	68417	1.42827
138	0.743	217	331	201.142	47902
139	0.743	370	510	324.787	77348	1.40666
140	0.743	196	388	230.893	54987
141	0.743	367	485	310.208	73876	1.41821
142	0.743	239	358	218.732	52091
143	0.743	361	490	317.254	75554	1.30913
144	0.743	276	383	242.339	57713
145	0.743	342	468	300.508	71566	1.34046
146	0.743	255	349	224.183	53389
147	0.743	468	634	407.765	97109	1.63008
148	0.743	186	432	250.149	59573
149	0.743	435	620	407.42	97027	1.59734
150	0.743	221	419	255.062	60743
151	0.743	351	467	303.889	72371	1.38924
152	0.743	217	356	218.745	52094
153	0.743	361	468	304.544	72527	1.42129
154	0.743	243	364	214.273	51029
155	0.743	443	578	386.61	92071	1.58784
156	0.743	243	382	243.481	57985
157	0.743	413	592	346.039	82409	1.49184
158	0.743	210	383	231.955	55240
159	0.743	416	541	357.46	85129	1.46711
160	0.743	282	380	243.649	58025
161	0.743	365	499	325.325	77476	1.43019
162	0.743	243	376	227.47	54172
163	0.743	322	444	296.469	70604	1.45141
164	0.743	177	325	204.262	48645
165	0.743	364	484	308.474	73463	1.66719
166	0.743	191	350	185.026	44064
167	0.743	430	558	371.594	88495	1.63716
168	0.743	191	372	226.975	54054
169	0.743	409	530	341.974	81441	1.5632
170	0.743	232	369	218.766	52099
171	0.743	369	496	319.908	76186	1.3974
172	0.743	270	356	228.932	54520
173	0.743	397	531	341.487	81325	1.47416
174	0.743	263	390	231.648	55167
175	0.743	352	455	302.226	71975	1.34467
176	0.743	230	361	224.758	53526
177	0.743	366	492	325.316	77474	1.40667
178	0.743	203	401	231.266	55076
179	0.743	441	588	368.281	87706	1.38587
180	0.743	238	442	265.74	63286
181	0.743	413	549	356.847	84983	1.32255
182	0.743	260	427	269.818	64257
183	0.743	310	417	272.438	64881	1.34035
184	0.743	217	344	203.259	48406
185	0.743	413	507	337.645	80410	1.39851
186	0.743	204	387	241.432	57497
187	0.743	359	479	313.534	74668	1.70382
188	0.743	180	312	184.019	43824
189	0.743	387	501	328.856	78317	1.55043
190	0.743	156	372	212.106	50513
191	0.743	395	501	334.743	79719	1.44387
192	0.743	215	408	231.837	55212
193	0.743	417	517	339.463	80843	1.48097
194	0.743	240	391	229.217	54588
195	0.743	424	549	367.072	87418	1.36352
196	0.743	316	424	269.209	64112
197	0.743	495	651	425.946	101439	1.36324
198	0.743	281	501	312.451	74410
199	0.743	446	606	379.366	90346	1.42869
200	0.743	229	437	265.535	63237

## Sheet: Figure 2-supp 1A WT 37C
	area	Min	Max	IntDen	RawIntDen	Raw N/C
1	0.976	1164	1298	1199.59	119213	1.48179
2	0.976	741	943	809.556	80452
3	0.976	1115	1320	1196.19	118875	1.95831
4	0.976	523	707	610.83	60703
5	0.976	927	1089	970.739	96470	1.36411
6	0.976	620	853	711.627	70720
7	0.976	861	1056	931.485	92569	1.43416
8	0.976	596	749	649.5	64546
9	0.976	1136	1456	1264.55	125668	1.59826
10	0.976	717	899	791.202	78628
11	0.976	941	1136	1013.58	100727	1.45416
12	0.976	555	819	697.016	69268
13	0.976	781	925	835.316	83012	1.37914
14	0.976	528	741	605.678	60191
15	0.976	970	1164	1038.77	103231	1.4956
16	0.976	650	809	694.551	69023
17	0.976	1106	1267	1151.36	114425	1.54482
18	0.976	674	860	745.299	74070
19	0.976	878	1068	939.669	93387	1.44638
20	0.976	599	722	649.669	64566
21	0.976	931	1117	995.403	98926	1.30803
22	0.976	676	861	760.996	75630
23	0.976	816	1145	972.441	96644	1.34514
24	0.976	646	821	722.931	71847
25	0.976	886	1098	963.154	95721	1.40638
26	0.976	598	778	684.846	68062
27	0.976	793	928	835.456	83030	1.46655
28	0.976	428	705	569.676	56616
29	0.976	914	1095	961.292	95536	1.8348
30	0.976	378	664	523.923	52069
31	0.976	806	953	869.586	86422	1.72962
32	0.976	455	579	502.763	49966
33	0.976	1016	1213	1072.97	106635	1.7771
34	0.976	469	716	603.776	60005
35	0.976	783	1002	875.785	87038	1.40502
36	0.976	575	706	623.327	61948
37	0.976	729	933	812.685	80767	1.57881
38	0.976	465	588	514.747	51157
39	0.976	757	950	837.207	83204	1.34328
40	0.976	479	726	623.256	61941
41	0.976	907	1116	961.313	95538	1.302
42	0.976	682	900	738.336	73378
43	0.976	960	1130	1027.11	102077	1.52338
44	0.976	514	806	674.231	67007
45	0.976	934	1107	998.009	99185	1.46589
46	0.976	518	793	680.822	67662
47	0.976	938	1091	994.175	98804	1.30636
48	0.976	632	885	761.027	75633
49	0.976	651	765	696.599	69230	1.35125
50	0.976	423	588	515.521	51234
51	0.976	823	1002	886.692	88122	1.56128
52	0.976	503	650	567.925	56442
53	0.976	839	1053	905.408	89982	1.33768
54	0.976	569	783	676.847	67267
55	0.976	728	888	778.887	77408	1.38587
56	0.976	490	649	562.018	55855
57	0.976	796	963	862.09	85677	1.42498
58	0.976	477	724	604.984	60125
59	0.976	890	1068	970.6	96461	1.49898
60	0.976	570	760	647.506	64351
61	0.976	971	1188	1051.97	104548	1.52705
62	0.976	469	842	688.891	68464
63	0.976	1389	1701	1503.63	149435	1.58808
64	0.976	872	1061	946.823	94098
65	0.976	650	831	722.066	71761	1.70527
66	0.976	307	503	423.433	42082
67	0.976	666	848	758.441	75376	1.4333
68	0.976	425	623	529.156	52589
69	0.976	679	829	743.257	73867	1.29564
70	0.976	499	685	573.66	57012
71	0.976	719	901	801.184	79624	1.4772
72	0.976	419	627	542.367	53902
73	0.976	965	1149	1014.99	100873	1.40171
74	0.976	643	856	724.109	71964
75	0.976	683	850	747.362	74275	1.4724
76	0.976	451	591	507.582	50445
77	0.976	738	928	805.823	80085	1.51481
78	0.976	417	619	531.963	52868
79	0.976	731	884	786.574	78172	1.47899
80	0.976	457	621	531.832	52855
81	0.976	837	1029	909.644	90403	1.59889
82	0.976	452	711	568.921	56541
83	0.976	913	1069	949.168	94331	1.44147
84	0.976	552	778	658.474	65441
85	0.976	957	1110	1000.96	99478	1.57581
86	0.976	592	731	635.2	63128
87	0.976	764	949	832.548	82741	1.26066
88	0.976	545	780	660.406	65633
89	0.976	1071	1294	1146.52	113944	1.51234
90	0.976	687	861	758.109	75343
91	0.976	785	955	852.773	84751	1.37719
92	0.976	503	727	619.211	61539
93	0.976	1072	1307	1164.54	115730	1.56986
94	0.976	591	897	741.815	73720
95	0.976	1112	1295	1151.62	114446	1.4903
96	0.976	678	888	772.747	76794
97	0.976	758	895	807	80198	1.36393
98	0.976	535	701	591.671	58799
99	0.976	749	916	819.297	81420	1.34909
100	0.976	477	694	607.298	60352
101	0.976	829	1003	867.879	86248	1.28301
102	0.976	630	757	676.438	67223
103	0.976	894	1057	956.339	95039	1.3297
104	0.976	500	840	719.214	71474
105	0.976	905	1111	984.917	97879	1.4658
106	0.976	629	759	671.93	66775
107	0.976	958	1113	1013.36	100706	1.30804
108	0.976	703	883	774.719	76990
109	0.976	1023	1263	1120.43	111352	1.81568
110	0.976	498	814	617.088	61328
111	0.976	1051	1258	1114.04	110716	1.44757
112	0.976	616	936	769.589	76484
113	0.976	790	917	827.346	82224	1.42091
114	0.976	447	698	582.263	57867
115	0.976	851	1034	914.534	90889	1.57258
116	0.976	508	674	581.549	57796
117	0.976	844	1020	892.196	88669	1.40662
118	0.976	519	758	634.284	63037
119	0.743	349	482	314.794	74968	1.45118
120	0.743	238	355	216.922	51660
121	0.743	313	427	273.534	65142	1.5009
122	0.743	183	291	182.247	43402
123	0.743	338	487	306.198	72921	1.40338
124	0.743	239	376	218.186	51961
125	0.743	291	418	254.172	60531	1.40199
126	0.743	207	289	181.294	43175
127	0.743	314	438	288.596	68729	1.36121
128	0.743	184	373	212.014	50491
129	0.743	234	353	207.575	49434	1.56412
130	0.743	143	220	132.711	31605
131	0.743	237	360	219.694	52320	1.32701
132	0.743	173	278	165.556	39427
133	0.743	271	378	246.853	58788	1.41812
134	0.743	144	303	174.071	41455
135	0.743	361	495	309.415	73687	1.52646
136	0.743	171	324	202.7	48273
137	0.743	353	478	312.954	74530	1.29611
138	0.743	241	430	241.457	57503
139	0.743	357	485	298.556	71101	1.29265
140	0.743	252	359	230.964	55004
141	0.743	357	459	301.52	71807	1.27324
142	0.743	239	370	236.813	56397
143	0.743	336	443	299.74	71383	1.29686
144	0.743	255	365	231.128	55043
145	0.743	364	492	313.135	74573	1.64323
146	0.743	134	337	190.561	45382
147	0.743	366	485	309.889	73800	1.34908
148	0.743	242	372	229.704	54704
149	0.743	404	502	335.117	79808	1.41828
150	0.743	260	377	236.284	56271
151	0.743	328	445	283.822	67592	1.46907
152	0.743	202	327	193.198	46010
153	0.743	299	397	261.096	62180	1.27476
154	0.743	190	333	204.821	48778
155	0.743	320	420	271.052	64551	1.42384
156	0.743	191	325	190.368	45336
157	0.743	329	445	293.664	69936	1.28205
158	0.743	247	372	229.058	54550
159	0.743	329	465	301.197	71730	1.33967
160	0.743	252	365	224.829	53543
161	0.743	400	506	330.704	78757	1.39329
162	0.743	244	388	237.355	56526
163	0.743	415	591	364.246	86745	1.33513
164	0.743	286	477	272.816	64971
165	0.743	301	386	259.513	61803	1.4409
166	0.743	183	303	180.105	42892
167	0.743	278	373	249.058	59313	1.5035
168	0.743	142	289	165.652	39450
169	0.743	306	448	282.986	67393	1.50777
170	0.743	177	333	187.684	44697
171	0.743	326	440	283.905	67612	1.49386
172	0.743	203	308	190.049	45260
173	0.743	351	490	307.777	73297	1.32547
174	0.743	232	397	232.203	55299
175	0.743	340	449	285.027	67879	1.27465
176	0.743	249	369	223.611	53253
177	0.743	306	412	266.488	63464	1.31067
178	0.743	218	319	203.322	48421

## Sheet: Figure 2-supp 1A mtr1-1 RT
	area	Min	Max	IntDen	RawIntDen	Raw N/C
1	0.976	539	647	576.397	57284	1.3012
2	0.976	399	525	442.974	44024
3	0.976	547	690	601.693	59798	1.72076
4	0.976	300	426	349.668	34751
5	0.976	481	750	596.723	59304	1.28841
6	0.976	409	544	463.148	46029
7	0.976	594	784	678.236	67405	1.32708
8	0.976	337	631	511.074	50792
9	0.976	532	651	575.2	57165	1.38227
10	0.976	367	472	416.128	41356
11	0.976	617	789	707.516	70315	1.41476
12	0.976	417	583	500.096	49701
13	0.976	595	695	627.321	62345	1.30437
14	0.976	423	560	480.938	47797
15	0.976	569	700	617.229	61342	1.43349
16	0.976	344	527	430.577	42792
17	0.976	635	804	703.522	69918	1.61686
18	0.976	371	509	435.115	43243
19	0.976	574	745	652.195	64817	1.49365
20	0.976	338	519	436.645	43395
21	0.976	605	781	674.593	67043	1.57389
22	0.976	337	537	428.615	42597
23	0.976	562	704	620.851	61702	1.62558
24	0.976	249	493	381.927	37957
25	0.976	571	725	624.464	62061	1.40349
26	0.976	328	524	444.936	44219
27	0.976	451	668	534.807	53148	1.2427
28	0.976	329	491	430.357	42768
29	0.976	554	683	592.113	58843	1.37394
30	0.976	375	504	430.961	42828
31	0.976	591	755	642.738	63874	1.44358
32	0.976	362	524	445.24	44247
33	0.976	486	637	549.317	54590	1.47298
34	0.976	328	441	372.93	37061
35	0.976	678	816	732.084	72753	1.56166
36	0.976	404	549	468.786	46587
37	0.976	584	744	638.925	63495	1.3886
38	0.976	390	521	460.122	45726
39	0.976	620	750	670.558	66642	1.4295
40	0.976	328	547	469.085	46619
41	0.976	582	697	635.009	63109	1.33876
42	0.976	402	574	474.327	47140
43	0.976	534	660	572.382	56885	1.594
44	0.976	304	467	359.086	35687
45	0.976	672	772	706.701	70234	1.40699
46	0.976	444	582	502.28	49918
47	0.976	549	660	583.048	57945	1.43852
48	0.976	355	467	405.311	40281
49	0.976	595	761	640.05	63610	1.50017
50	0.976	369	502	426.653	42402
51	0.976	555	757	636.679	63275	1.42978
52	0.976	389	506	445.298	44255
53	0.976	578	703	642.596	63863	1.58662
54	0.976	304	502	405.009	40251
55	0.976	595	777	678.407	67422	1.52916
56	0.976	381	521	443.648	44091
57	0.976	609	737	656.522	65247	1.40479
58	0.976	400	545	467.344	46446
59	0.976	684	806	723.626	71916	1.46159
60	0.976	370	593	495.095	49204
61	0.976	565	755	641.801	63784	1.51632
62	0.976	309	497	423.262	42065
63	0.976	575	698	629.626	62574	1.39202
64	0.976	367	563	452.311	44952
65	0.976	666	800	712.346	70795	1.33586
66	0.976	500	639	533.251	52996
67	0.976	542	701	591.722	58807	1.78208
68	0.976	277	398	332.039	32999
69	0.976	476	617	536.752	53344	1.36583
70	0.976	322	456	392.985	39056
71	0.976	558	666	600.113	59641	1.39221
72	0.976	396	494	431.05	42839
73	0.976	584	707	633.489	62958	1.76318
74	0.976	285	462	359.287	35707
75	0.976	681	831	731.997	72748	1.55001
76	0.976	359	592	472.254	46934
77	0.976	683	824	734.493	72996	1.51328
78	0.976	424	570	485.365	48237
79	0.976	746	912	797.874	79295	1.63758
80	0.976	382	597	487.227	48422
81	0.976	641	786	700.101	69578	1.54597
82	0.976	363	529	452.855	45006
83	0.976	550	687	605.839	60210	1.52403
84	0.976	359	464	397.523	39507
85	0.976	670	815	716.25	71183	1.43877
86	0.976	371	596	497.822	49475
87	0.976	674	854	757.666	75299	1.32809
88	0.976	524	655	570.491	56697
89	0.976	617	762	661.009	65693	1.44155
90	0.976	397	575	458.54	45571
91	0.976	652	803	710.022	70564	1.53999
92	0.976	398	565	461.055	45821
93	0.976	612	736	638.078	63414	1.45352
94	0.976	360	506	438.989	43628
95	0.976	593	751	666.865	66275	1.49208
96	0.976	413	542	446.938	44418
97	0.976	558	747	636.76	63283	1.35733
98	0.976	435	558	469.125	46623
99	0.976	563	654	587.073	58345	1.54442
100	0.976	340	441	380.126	37778
101	0.976	534	700	598.876	59518	1.34857
102	0.976	333	533	444.081	44134
103	0.976	605	746	656.491	65244	1.39086
104	0.976	417	527	472.003	46909
105	0.976	631	764	680.711	67651	1.53836
106	0.976	384	529	442.491	43976
107	0.976	514	610	546.784	54341	1.32746
108	0.976	358	483	411.902	40936
109	0.976	566	689	609.401	60564	1.3479
110	0.976	369	524	452.11	44932
111	0.976	548	690	606.684	60294	1.39202
112	0.976	396	500	435.83	43314
113	0.976	542	653	577.906	57434	1.52738
114	0.976	249	445	378.365	37603
115	0.976	626	759	681.174	67697	1.49699
116	0.976	343	546	455.028	45222
117	0.976	592	756	671.786	66764	1.4364
118	0.976	417	516	467.686	46480
119	0.976	493	607	540.153	53682	1.52675
120	0.976	327	408	353.793	35161
121	0.976	575	701	617.35	61354	1.41506
122	0.976	340	527	436.272	43358
123	0.976	479	579	511.014	50786	1.42174
124	0.976	301	419	359.428	35721
125	0.976	554	672	599.067	59537	1.49227
126	0.976	340	455	401.447	39897
127	0.976	439	600	489.199	48618	1.40946
128	0.976	321	403	347.082	34494
129	0.976	735	846	762.312	75757	1.60336
130	0.976	360	545	475.448	47249
131	0.976	598	727	637.103	63314	1.75099
132	0.976	318	428	363.853	36159
133	0.976	568	694	616.847	61301	1.44404
134	0.976	339	488	427.167	42451
135	0.976	519	629	560.235	55675	1.67549
136	0.976	286	405	334.37	33229
137	0.976	607	785	670.853	66668	1.82054
138	0.976	245	481	368.492	36620
139	0.976	487	642	538.825	53550	1.23806
140	0.976	373	524	435.216	43253
141	0.976	622	788	693.248	68897	1.56396
142	0.976	396	519	443.266	44053
143	0.976	598	742	659.077	65501	1.49991
144	0.976	335	544	439.412	43670
145	0.976	597	723	647.144	64315	1.48585
146	0.976	317	516	435.538	43285
147	0.743	692	876	579.245	137947	1.51942
148	0.743	371	656	381.227	90789
149	0.743	625	754	511.918	121913	1.34599
150	0.743	440	605	380.328	90575
151	0.743	570	774	490.721	116865	1.3556
152	0.743	337	631	361.995	86209
153	0.743	621	893	539.841	128563	1.3696
154	0.743	402	664	394.16	93869
155	0.743	450	658	405.959	96679	1.44495
156	0.743	220	482	280.949	66908
157	0.743	723	937	615.004	146463	1.57638
158	0.743	339	683	390.137	92911
159	0.743	716	951	612.913	145965	1.58303
160	0.743	310	661	387.177	92206
161	0.743	614	852	558.901	133102	1.57469
162	0.743	258	627	354.928	84526
163	0.743	575	722	481.16	114588	1.36246
164	0.743	421	545	353.156	84104
165	0.743	602	739	498.006	118600	1.33386
166	0.743	433	611	373.358	88915
167	0.743	551	696	463.23	110318	1.45188
168	0.743	330	506	319.056	75983
169	0.743	557	717	477.595	113739	1.44948
170	0.743	346	516	329.494	78469
171	0.743	567	721	483.15	115062	1.62887
172	0.743	302	511	296.616	70639
173	0.743	538	689	455.772	108542	1.34719
174	0.743	395	508	338.312	80569
175	0.743	586	753	496.49	118239	1.48175
176	0.743	398	516	335.071	79797
177	0.743	628	830	531.624	126606	1.45012
178	0.743	359	581	366.606	87307
179	0.743	623	800	529.558	126114	1.79563
180	0.743	157	553	294.915	70234
181	0.743	705	941	611.275	145575	1.88162
182	0.743	335	535	324.867	77367
183	0.743	585	776	478.636	113987	1.52151
184	0.743	344	502	314.579	74917
185	0.743	563	739	473.538	112773	1.42738
186	0.743	329	521	331.754	79007
187	0.743	476	597	400.072	95277	1.37523
188	0.743	301	476	290.914	69281
189	0.743	493	626	406.732	96863	1.43087
190	0.743	282	470	284.254	67695
191	0.743	604	769	511.771	121878	1.38076
192	0.743	446	566	370.645	88269
193	0.743	564	716	468.386	111546	1.40999
194	0.743	373	523	332.19	79111
195	0.743	440	616	401.487	95614	1.40675
196	0.743	294	453	285.4	67968
197	0.743	554	785	494.038	117655	1.46135
198	0.743	278	593	338.069	80511
199	0.743	699	844	567.173	135072	1.47933
200	0.743	444	611	383.398	91306
201	0.743	585	754	491.905	117147	1.48953
202	0.743	349	530	330.242	78647
203	0.743	541	688	458.968	109303	1.71235
204	0.743	240	489	268.033	63832
205	0.743	456	599	401.336	95578	1.54717
206	0.743	265	413	259.4	61776
207	0.743	479	612	411.216	97931	1.30794
208	0.743	355	487	314.399	74874
209	0.743	585	791	498.313	118673	1.60183
210	0.743	292	503	311.09	74086
211	0.743	517	710	465.695	110905	1.48429
212	0.743	324	505	313.748	74719
213	0.743	452	714	461.088	109808	1.63099
214	0.743	262	477	282.705	67326
215	0.743	494	679	438.329	104388	1.59084
216	0.743	305	437	275.533	65618
217	0.743	463	638	414.042	98604	1.55358
218	0.743	294	416	266.509	63469
219	0.743	368	523	338.233	80550	1.34979
220	0.743	278	396	250.582	59676
221	0.743	335	474	312.136	74335	1.3155
222	0.743	279	365	237.275	56507
223	0.743	448	585	397.309	94619	1.36739
224	0.743	329	459	290.561	69197
225	0.743	488	611	414.806	98786	1.54735
226	0.743	294	464	268.075	63842
227	0.743	591	731	483.129	115057	1.41164
228	0.743	348	557	342.247	81506
229	0.743	419	590	368.176	87681	1.51571
230	0.743	261	387	242.906	57848
231	0.743	527	684	447.592	106594	1.4348
232	0.743	359	478	311.955	74292
233	0.743	354	456	308.331	73429	1.48431
234	0.743	202	337	207.727	49470
235	0.743	422	554	364.082	86706	1.51669
236	0.743	221	422	240.051	57168
237	0.743	459	605	398.678	94945	1.59913
238	0.743	254	388	249.31	59373
239	0.743	539	675	451.38	107496	1.43332
240	0.743	350	489	314.92	74998
241	0.743	521	708	460.891	109761	1.60742
242	0.743	319	475	286.727	68284
243	0.743	594	745	485.275	115568	1.73182
244	0.743	282	430	280.21	66732
245	0.743	530	664	439.61	104693	1.7602
246	0.743	281	401	249.751	59478
247	0.743	502	631	414.559	98727	1.61195
248	0.743	294	411	257.179	61247
249	0.743	497	665	420.076	100041	1.63122
250	0.743	229	430	257.523	61329
251	0.743	652	814	532.564	126830	1.69473
252	0.743	272	512	314.248	74838
253	0.743	537	782	488.067	116233	1.56402
254	0.743	339	520	312.06	74317
255	0.743	507	661	436.096	103856	1.7344
256	0.743	108	449	251.439	59880
257	0.743	474	598	396.906	94523	1.56236
258	0.743	284	408	254.042	60500

## Sheet: Figure 2-supp 1A mtr1-1 37C
	area	Min	Max	IntDen	RawIntDen	Raw N/C
1	0.976	250	347	292.183	29038	1.18581
2	0.976	208	293	246.401	24488
3	0.976	344	480	389.272	38687	0.977957
4	0.976	352	471	398.046	39559
5	0.976	310	477	379.472	37713	1.05082
6	0.976	334	426	361.119	35889
7	0.976	281	398	320.578	31860	0.971993
8	0.976	298	400	329.815	32778
9	0.976	381	486	420.747	41815	1.07147
10	0.976	334	453	392.683	39026
11	0.976	398	514	429.933	42728	1.08911
12	0.976	356	466	394.756	39232
13	0.976	303	460	383.376	38101	1.01638
14	0.976	338	433	377.198	37487
15	0.976	317	441	356.007	35381	0.968652
16	0.976	308	445	367.528	36526
17	0.976	361	471	404.708	40219	1.04712
18	0.976	297	462	386.494	38409
19	0.976	442	548	481.908	47891	1.07948
20	0.976	389	517	446.427	44365
21	0.976	368	468	406.036	40351	1.00229
22	0.976	371	471	405.11	40259
23	0.976	275	384	306.859	30495	0.957577
24	0.976	278	387	320.453	31846
25	0.976	333	466	390.006	38758	0.993082
26	0.976	338	451	392.723	39028
27	0.976	217	327	269.567	26789	0.983949
28	0.976	237	330	273.964	27226
29	0.976	294	401	331.12	32906	0.99022
30	0.976	303	392	334.39	33231
31	0.976	315	417	346.428	34429	1.1338
32	0.976	315	417	346.428	30366
33	0.976	232	372	305.546	49017	1.12113
34	0.976	232	372	305.546	43721
35	0.976	431	552	493.214	48465	1.04239
36	0.976	431	552	493.214	46494
37	0.976	405	507	439.925	37663	1.07824
38	0.976	405	507	439.925	34930
39	0.976	416	579	487.659	38368	1.04682
40	0.976	377	543	467.827	36652
41	0.976	334	437	378.969	40568	1.09312
42	0.976	334	437	378.969	37112
43	0.976	311	412	351.469	37136	1.06115
44	0.976	311	412	351.469	34996
45	0.976	326	471	386.063	37833	1.10008
46	0.976	332	433	368.796	34391
47	0.976	369	457	408.199	45737	0.957582
48	0.976	268	449	373.425	47763
49	0.976	339	445	373.666	44812	1.14653
50	0.976	327	410	352.133	39085
51	0.976	316	462	380.679	32968	0.956787
52	0.976	282	399	346.046	34457
53	0.976	404	556	460.21	36838	1.06699
54	0.976	406	580	480.596	34525
55	0.976	363	556	450.903	42887	1.10457
56	0.976	351	459	393.277	38827
57	0.976	296	411	331.727	39139	1.07744
58	0.976	307	392	346.71	36326
59	0.976	259	459	370.667	47398	1.11904
60	0.976	301	391	347.394	42356
61	0.976	381	525	431.533	50429	0.943409
62	0.976	338	480	390.681	53454
63	0.976	345	452	393.82	55000	1.14959
64	0.976	287	449	365.516	47843
65	0.976	430	545	476.923	39322	0.989756
66	0.976	354	509	426.19	39729
67	0.976	452	604	507.421	40014	1.18958
68	0.976	493	634	537.859	33637
69	0.976	512	628	553.415	54285	1.12175
70	0.976	441	550	481.401	48393
71	0.976	323	485	395.662	48665	1.12442
72	0.976	326	497	399.757	43280
73	0.976	360	463	402.625	49794	1.03865
74	0.976	286	385	338.459	47941
75	0.976	484	647	546.221	49794	1.0475
76	0.976	393	561	486.935	47536
77	0.976	438	566	489.672	42656	0.993664
78	0.976	387	525	435.488	42928
79	0.976	445	584	501.032	44969	1.1863
80	0.976	436	551	482.387	37907
81	0.976	445	584	501.032	41449	1.12139
82	0.976	418	551	478.312	36962
83	0.976	348	504	429.209	55739	1.09281
84	0.976	397	488	431.946	51005
85	0.976	401	523	452.482	44803	1.00805
86	0.976	330	448	381.424	44445
87	0.976	377	485	417.064	47096	1.06595
88	0.976	310	459	371.915	44182
89	0.976	477	681	560.851	47049	1.08139
90	0.976	456	587	513.217	43508
91	0.976	404	541	450.812	39130	1.03139
92	0.976	345	539	447.21	37939
93	0.976	419	537	473.884	35630	0.908396
94	0.976	394	506	444.564	39223
95	0.976	399	569	473.412	45819	0.820115
96	0.976	414	497	437.782	55869
97	0.976	343	456	393.73	55383	1.11231
98	0.976	343	468	381.746	49791
99	0.976	296	428	358.512	45439	0.929546
100	0.976	350	445	394.666	48883
101	0.743	145	224	140.844	33542	0.963297
102	0.743	162	239	146.211	34820
103	0.743	152	216	137.304	32699	1.13751
104	0.743	130	190	120.706	28746
105	0.743	279	486	304.157	72435	1.0982
106	0.743	327	431	276.96	65958
107	0.743	407	535	347.223	82691	0.994157
108	0.743	408	563	349.264	83177
109	0.743	272	467	287.076	68367	1.02344
110	0.743	259	458	280.5	66801
111	0.743	266	423	259.568	61816	1.0465
112	0.743	171	425	248.033	59069
113	0.743	279	434	259.513	61803	0.839475
114	0.743	290	496	309.138	73621
115	0.743	324	488	308.831	73548	1.16613
116	0.743	296	409	264.833	63070
117	0.743	291	426	274.218	65305	1.08284
118	0.743	262	396	253.24	60309
119	0.743	251	380	236.469	56315	1.15667
120	0.743	233	337	204.439	48687
121	0.743	270	434	256.251	61026	1.05208
122	0.743	233	389	243.565	58005
123	0.743	245	376	236.036	56212	1.04544
124	0.743	239	426	225.778	53769
125	0.743	238	372	233.672	55649	1.14044
126	0.743	172	361	204.896	48796
127	0.743	258	396	249.318	59375	1.03345
128	0.743	228	388	241.247	57453
129	0.743	295	475	296.037	70501	1.14832
130	0.743	204	451	257.8	61395
131	0.743	268	520	309.788	73776	1.08132
132	0.743	210	460	286.492	68228
133	0.743	283	501	310.754	74006	1.04466
134	0.743	348	483	297.468	70842
135	0.743	309	450	280.185	66726	1.01229
136	0.743	284	422	276.784	65916
137	0.743	340	568	349.146	83149	1.06562
138	0.743	358	507	327.647	78029
139	0.743	311	500	319.61	76115	1.06722
140	0.743	222	479	299.48	71321
141	0.743	396	570	364.032	86694	1.06859
142	0.743	341	527	340.664	81129
143	0.743	316	498	302.789	72109	0.969285
144	0.743	306	535	312.383	74394
145	0.743	347	473	311.842	74265	1.0422
146	0.743	343	463	299.215	71258
147	0.743	439	669	404.271	96277	1.113
148	0.743	419	566	363.225	86502
149	0.743	401	545	342.957	81675	1.04543
150	0.743	341	551	328.054	78126
151	0.743	378	564	353.194	84113	1.03742
152	0.743	346	541	340.454	81079
153	0.743	340	531	330.851	78792	1.06727
154	0.743	348	513	309.998	73826
155	0.743	374	485	315.486	75133	1.25708
156	0.743	208	405	250.968	59768
157	0.743	252	405	246.904	58800	1.13584
158	0.743	222	346	217.376	51768
159	0.743	295	455	282.595	67300	1.0331
160	0.743	262	455	273.542	65144
161	0.743	258	424	250.838	59737	1.004
162	0.743	264	397	249.839	59499
163	0.743	252	462	256.112	60993	0.978769
164	0.743	252	422	261.667	62316
165	0.743	290	445	269.146	64097	1.13823
166	0.743	234	381	236.461	56313
167	0.743	291	504	297.3	70802	1.08564
168	0.743	274	439	273.849	65217
169	0.743	359	485	309.725	73761	1.09865
170	0.743	293	446	281.915	67138
171	0.743	334	487	311.569	74200	0.94626
172	0.743	352	545	329.264	78414
173	0.743	296	444	281.772	67104	0.939608
174	0.743	337	478	299.883	71417
175	0.743	329	470	296.902	70707	1.15423
176	0.743	276	420	257.229	61259
177	0.743	331	480	298.896	71182	0.998065
178	0.743	337	500	299.476	71320
179	0.743	267	523	310.485	73942	1.07945
180	0.743	300	456	287.634	68500
181	0.743	245	457	259.454	61789	0.958444
182	0.743	311	428	270.704	64468
183	0.743	259	377	242.058	57646	0.963432
184	0.743	273	395	251.245	59834
185	0.743	275	430	260.63	62069	1.12806
186	0.743	265	370	231.044	55023
187	0.743	372	496	316.528	75381	1.08222
188	0.743	334	462	292.48	69654
189	0.743	358	535	325.724	77571	1.01001
190	0.743	379	510	322.495	76802
191	0.743	353	548	324.628	77310	1.01089
192	0.743	165	546	321.13	76477
193	0.743	344	468	309.423	73689	1.20144
194	0.743	180	436	257.544	61334
195	0.743	304	419	264.544	63001	1.08065
196	0.743	254	386	244.8	58299
197	0.743	273	402	249.234	59355	0.881737
198	0.743	323	453	282.663	67316
199	0.743	281	421	261.193	62203	1.2019
200	0.743	193	356	217.317	51754

## Sheet: Figure 2-supp 1B GFP
	area	Min	Max	IntDen	RawIntDen	Raw N/C
1	7.111	768	1487	7941.78	746057	1.02938
2	7.111	604	1476	7715.07	724760
3	7.111	1040	2291	11277.4	1059412	1.55618
4	7.111	324	1693	7246.88	680778
5	7.111	1031	2298	12085.3	1135303	1.69654
6	7.111	453	1606	7123.48	669186
7	7.111	1418	2960	15483.1	1454495	1.23673
8	7.111	1056	2401	12519.4	1176081
9	7.111	383	1114	5052.08	474597	1.34137
10	7.111	221	866	3766.37	353816
11	7.111	1733	3208	17707.9	1663496	1.30294
12	7.111	1122	3035	13590.7	1276723
13	7.111	625	1427	7176.23	674141	1.70274
14	7.111	205	898	4214.52	395915
15	7.111	1170	2016	11299	1061435	1.76847
16	7.111	481	1481	6389.13	600200
17	7.111	295	916	4186.64	393296	0.880525
18	7.111	324	1010	4754.71	446661
19	7.111	171	723	3309.32	310880	1.08767
20	7.111	20	780	3042.57	285822
21	7.111	617	1225	6454.46	606337	1.1324
22	7.111	473	1316	5699.81	535445
23	7.111	375	947	4567.46	429071	1.06023
24	7.111	183	958	4308.01	404698
25	7.111	517	1232	6355.83	597072	1.21642
26	7.111	247	1111	5225.02	490843
27	7.111	640	1282	7064.52	663647	1.2931
28	7.111	396	1213	5463.23	513220
29	7.111	593	1370	7067.63	663939	1.67258
30	7.111	246	1045	4225.6	396956
31	7.111	203	690	3232.7	303682	1.74291
32	7.111	52	462	1854.76	174238
33	7.111	187	714	2985.74	280483	1.40974
34	7.111	78	541	2117.94	198961
35	7.111	605	1725	8168.28	767335	1.60311
36	7.111	422	1013	5095.26	478653
37	7.111	253	884	4192.87	393882	1.15381
38	7.111	240	811	3633.95	341376
39	7.111	327	1173	5192.47	487785	1.29597
40	7.111	119	1021	4006.64	376387
41	7.111	1364	2806	15061.2	1414862	1.16429
42	7.111	1239	2352	12936	1215214
43	7.111	257	970	4716.22	443046	1.26479
44	7.111	325	735	3728.86	350292
45	7.111	885	1732	9365.46	879799	1.65161
46	7.111	420	1266	5670.51	532692
47	7.111	517	1290	6780.09	636927	2.15481
48	7.111	180	791	3146.49	295584
49	7.111	528	1538	7850.89	737519	1.08156
50	7.111	411	1561	7258.86	681903
51	7.111	601	1520	7512.52	705732	1.16134
52	7.111	337	1309	6468.85	607689
53	7.111	948	2079	10364.5	973652	1.50094
54	7.111	568	1416	6905.37	648696
55	7.111	148	650	2666.14	250459	0.975657
56	7.111	117	663	2732.66	256708
57	7.111	248	737	3578.1	336130	1.63138
58	7.111	98	535	2193.3	206040
59	7.111	250	863	4246.39	398909	1.75094
60	7.111	135	592	2425.21	227826
61	7.111	203	734	3150.16	295929	0.969264
62	7.111	174	818	3250.06	305313
63	7.111	251	811	3800.2	356994	1.11288
64	7.111	169	874	3414.74	320784
65	7.111	613	1439	6903.09	648482	1.21228
66	7.111	355	1294	5694.29	534926
67	7.111	675	1943	9116.23	856386	1.51343
68	7.111	297	1330	6023.56	565858
69	7.111	945	1936	10113.9	950112	1.21851
70	7.111	655	1515	8300.27	779734
71	7.111	372	1013	4738.05	445096	1.34278
72	7.111	162	815	3528.54	331474
73	7.111	925	1830	9919.75	931870	1.71031
74	7.111	503	1228	5799.98	544855

## Sheet: Figure 2-supp 1B 665-745 GFP
	area	Min	Max	IntDen	RawIntDen	Raw N/C
1	7.111	3411	5175	30999.3	2912101	2.41223
2	7.111	914	2476	12850.9	1207222
3	7.111	1275	2966	16347.3	1535682	2.04724
4	7.111	633	1674	7985.05	750122
5	7.111	2257	4828	25856.9	2429014	1.11498
6	7.111	796	6079	23190.4	2178525
7	7.111	2393	4619	26292.4	2469932	1.66813
8	7.111	986	3589	15761.6	1480659
9	7.111	3932	6910	39942.6	3752237	2.87676
10	7.111	1050	2763	13884.6	1304329
11	7.111	3331	5959	33264.4	3124885	1.98395
12	7.111	1284	3210	16766.7	1575079
13	7.111	2199	3862	22493.7	2113078	2.36309
14	7.111	695	2132	9518.77	894201
15	7.111	2676	5122	28948.1	2719412	2.41991
16	7.111	548	2705	11962.5	1123766
17	7.111	3607	5807	32770.1	3078454	4.11237
18	7.111	423	2085	7968.68	748584
19	7.111	884	1685	9143.88	858984	2.86557
20	7.111	141	897	3190.95	299760
21	7.111	545	1346	7096.78	666677	1.30862
22	7.111	443	1414	5423.12	509452
23	7.111	4590	7209	41319.3	3881569	1.56624
24	7.111	2534	5075	26381.2	2478269
25	7.111	3821	6926	38897.9	3654099	1.55788
26	7.111	1360	6769	24968.5	2345561
27	7.111	1797	2982	17037.3	1600494	4.67556
28	7.111	221	837	3643.9	342311
29	7.111	3140	4873	28101.1	2639838	2.92921
30	7.111	724	2024	9593.4	901212
31	7.111	2346	4140	23100.5	2170083	3.2015
32	7.111	568	1532	7215.54	677834
33	7.111	4420	7455	43214.5	4059605	2.74297
34	7.111	975	3714	15754.6	1480001
35	7.111	2152	3840	20394.1	1915836	2.58322
36	7.111	571	2016	7894.82	741646
37	7.111	1188	2043	11476.4	1078100	2.16582
38	7.111	202	1219	5298.87	497780
39	7.111	780	1884	9447.99	887552	2.43811
40	7.111	200	961	3875.13	364033
41	7.111	1141	1949	10870.6	1021190	2.88835
42	7.111	303	793	3763.59	353555
43	7.111	3878	7436	42019.2	3947315	2.98684
44	7.111	348	3360	14068.1	1321569
45	7.111	565	1196	6252.33	587349	1.57542
46	7.111	280	847	3968.67	372820
47	7.111	2177	3884	21156.8	1987484	2.51173
48	7.111	552	2092	8423.17	791280
49	7.111	462	1389	6823	640958	1.71054
50	7.111	270	915	3988.79	374710
51	7.111	742	1850	9647.77	906320	2.1618
52	7.111	211	1056	4462.85	419244
53	7.111	815	1474	8095.36	760485	3.60409
54	7.111	79	638	2246.16	211006
55	7.111	286	723	3599.03	338096	2.41908
56	7.111	55	360	1487.77	139762
57	7.111	448	972	5106.34	479694	3.24405
58	7.111	44	476	1574.07	147869
59	7.111	823	1596	8527.89	801117	2.66299
60	7.111	128	766	3202.38	300834
61	7.111	738	1785	8986.85	844232	2.36892
62	7.111	236	801	3793.65	356379
63	7.111	393	1005	4681.64	439797	1.82444
64	7.111	135	573	2566.07	241059
65	7.111	533	1213	5906.24	554837	2.28893
66	7.111	207	600	2580.35	242400
67	7.111	474	1043	5366.81	504163	1.62223
68	7.111	259	657	3308.28	310783
69	7.111	1307	2851	15109.4	1419387	2.17624
70	7.111	505	1591	6942.88	652220
71	7.111	1173	2320	12467.7	1171225	2.93263
72	7.111	136	1141	4251.37	399377

## Sheet: Figure 2-supp 1C hbcat FL
	area	Mean	Min	Max	IntDen	RawIntDen	Raw N/C
1	6.61	31.409	16	63	207.597	4303	2.29249
2	6.61	13.701	4	28	90.556	1877
3	6.61	151.766	50	255	1003.11	20792	3.95586
4	6.61	38.365	17	60	253.575	5256
5	6.61	61.277	36	146	405.015	8395	2.70457
6	6.61	22.657	7	51	149.752	3104
7	6.61	27.825	18	52	183.909	3812	2.19965
8	6.61	12.65	4	21	83.608	1733
9	6.61	59.277	25	212	391.796	8121	2.99447
10	6.61	19.796	9	41	130.84	2712
11	6.61	17.46	9	28	115.402	2392	1.38346
12	6.61	12.62	6	28	83.415	1729
13	6.61	51.036	24	210	337.328	6992	2.1721
14	6.61	23.496	10	41	155.3	3219
15	6.61	147.277	51	255	973.436	20177	3.65724
16	6.61	40.27	18	70	266.167	5517
17	6.61	22.241	10	31	147.002	3047	2.51403
18	6.61	8.847	1	16	58.473	1212
19	6.61	21.226	9	40	140.296	2908	2.60107
20	6.61	8.161	0	18	53.938	1118
21	6.61	21.934	11	47	144.976	3005	1.729
22	6.61	12.686	5	27	83.85	1738
23	6.61	21.905	10	46	144.783	3001	1.98217
24	6.61	11.051	1	22	73.043	1514
25	6.61	102.168	31	255	675.283	13997	4.2752
26	6.61	23.898	14	37	157.954	3274
27	6.61	21.912	12	34	144.831	3002	1.81171
28	6.61	12.095	4	24	79.942	1657
29	6.61	16.54	8	27	109.323	2266	1.66373
30	6.61	9.942	2	20	65.709	1362
31	6.61	217.781	89	255	1439.43	29836	3.41568
32	6.61	63.759	7	143	421.419	8735
33	6.61	160.942	52	255	1063.75	22049	3.63066
34	6.61	44.328	22	89	292.991	6073
35	6.61	89.248	32	255	589.889	12227	2.82248
36	6.61	31.62	0	75	208.997	4332
37	6.61	31.956	15	56	211.216	4378	2.34243
38	6.61	13.642	2	27	90.17	1869
39	6.61	115.869	51	255	765.838	15874	2.60016
40	6.61	44.562	16	86	294.535	6105
41	6.61	27.219	7	50	179.905	3729	3.79349
42	6.61	7.175	0	19	47.425	983
43	6.61	44.613	22	79	294.872	6112	1.65502
44	6.61	26.956	9	49	178.168	3693
45	6.61	86.796	43	203	573.679	11891	3.78453
46	6.61	22.934	6	49	151.585	3142
47	6.61	24.409	10	44	161.331	3344	3.29134
48	6.61	7.416	1	20	49.017	1016
49	6.61	29.073	11	51	192.159	3983	3.05445
50	6.61	9.518	1	31	62.911	1304
51	6.61	67.336	26	149	445.059	9225	3.51161
52	6.61	19.175	7	39	126.739	2627
53	6.61	92.182	34	212	609.284	12629	3.77436
54	6.61	24.423	0	65	161.427	3346
55	6.61	133.934	71	255	885.244	18349	2.66895
56	6.61	50.182	21	88	331.683	6875
57	6.61	23.372	8	43	154.48	3202	2.06447
58	6.61	11.321	3	33	74.828	1551
59	6.61	34.701	17	65	229.356	4754	2.51136
60	6.61	13.818	2	33	91.327	1893
61	6.61	18.131	7	36	119.84	2484	2.15251
62	6.61	8.423	1	20	55.675	1154
63	6.61	21.577	8	37	142.612	2956	3.82406
64	6.61	5.642	0	18	37.293	773
65	6.61	21.088	8	38	139.379	2889	2.69496
66	6.61	7.825	1	24	51.718	1072
67	6.61	60.314	35	127	398.647	8263	1.6493
68	6.61	36.569	11	74	241.707	5010
69	6.61	100.051	47	241	661.292	13707	2.89544
70	6.61	34.555	12	67	228.391	4734
71	6.61	61.263	37	91	404.919	8393	2.22981
72	6.61	27.474	9	51	181.594	3764
73	6.61	30.591	12	58	202.194	4191	2.16589
74	6.61	14.124	3	33	93.354	1935
75	6.61	199.927	66	255	1321.43	27390	5.83884
76	6.61	34.241	6	71	226.316	4691
77	6.61	31.985	16	57	211.409	4382	3.33994
78	6.61	9.577	1	27	63.297	1312
79	6.61	93.248	40	255	616.328	12775	2.8114
80	6.61	33.168	1	63	219.224	4544
81	6.61	33.161	14	68	219.176	4543	3.0106
82	6.61	11.015	2	26	72.801	1509
83	6.61	249.38	151	255	1648.28	34165	1.91422
84	6.61	130.277	84	174	861.074	17848
85	6.61	101.912	38	255	673.594	13962	2.45723
86	6.61	41.474	17	80	274.127	5682
87	6.61	126.547	52	255	836.421	17337	3.4529
88	6.61	36.65	9	72	242.237	5021
89	6.61	64.219	21	142	424.458	8798	2.16114
90	6.61	29.715	6	50	196.405	4071
91	6.61	23.628	9	50	156.168	3237	2.04356
92	6.61	11.562	1	31	76.42	1584
93	6.61	151.153	50	255	999.054	20708	2.54273
94	6.61	59.445	27	118	392.906	8144
95	6.61	53.372	29	76	352.766	7312	3.23397
96	6.61	16.504	6	30	109.082	2261
97	6.61	72.715	36	126	480.615	9962	3.7423
98	6.61	19.431	6	38	128.428	2662
99	6.61	170.905	80	255	1129.6	23414	2.17865
100	6.61	78.445	40	135	518.487	10747
101	6.61	115.124	56	245	760.917	15772	2.91319
102	6.61	39.518	10	70	261.197	5414
103	6.61	222.401	126	255	1469.97	30469	2.66337
104	6.61	83.504	41	122	551.921	11440
105	6.61	213.022	86	255	1407.98	29184	3.27285
106	6.61	65.088	33	116	430.199	8917
107	6.61	255	255	255	1685.43	34935	2.50916
108	6.61	101.628	40	158	671.713	13923
109	6.61	230.839	116	255	1525.74	31625	4.29629
110	6.61	53.73	23	101	355.13	7361
111	6.61	75.504	43	144	499.044	10344	2.10372
112	6.61	35.891	9	66	237.22	4917
113	6.61	198.365	96	255	1311.1	27176	2.67217
114	6.61	74.234	23	107	490.65	10170
115	6.61	171.569	75	255	1133.99	23505	2.92934
116	6.61	58.569	32	102	387.116	8024
117	6.61	134.54	55	255	889.249	18432	2.92108
118	6.61	46.058	14	91	304.425	6310
119	6.61	50.803	15	89	335.784	6960	2.79968
120	6.61	18.146	2	56	119.937	2486
121	6.61	68.847	19	119	455.045	9432	2.79136
122	6.61	24.664	6	54	163.019	3379
123	6.61	86.978	36	255	574.885	11916	2.77633
124	6.61	31.328	12	63	207.067	4292
125	6.61	73.635	34	106	486.694	10088	3.06254
126	6.61	24.044	3	54	158.918	3294
127	6.61	240.912	116	255	1592.32	33005	4.85154
128	6.61	49.657	24	96	328.21	6803
129	6.61	46.927	24	85	310.166	6429	2.50839
130	6.61	18.708	7	42	123.651	2563
131	6.61	138.642	50	255	916.362	18994	3.03855
132	6.61	45.628	17	74	301.578	6251
133	6.61	85.314	33	175	563.886	11688	1.70603
134	6.61	50.007	29	72	330.525	6851

## Sheet: Figure 2 supp 1C hbcat d665-745
	area	Mean	Min	Max	IntDen	RawIntDen	Raw N/C
1	6.61	97.92	56	202	647.204	13415	1.86864	1.86864
2	6.61	52.401	15	124	346.35	7179		1.51272
3	6.61	131.088	85	191	866.429	17959	1.51272	1.19235
4	6.61	86.657	53	134	572.763	11872		1.44853
5	6.61	66.423	35	114	439.028	9100	1.19235	1.30743
6	6.61	55.708	23	89	368.205	7632		0.971019
7	6.61	124.489	67	184	822.815	17055	1.44853	1.03971
8	6.61	85.942	42	142	568.035	11774		1.5392
9	6.61	58.453	31	93	386.345	8008	1.30743	1.14153
10	6.61	44.708	20	76	295.5	6125		1.44673
11	6.61	45	28	75	297.429	6165	0.971019	1.6831
12	6.61	46.343	18	74	306.306	6349		1.01289
13	6.61	36.504	12	64	241.272	5001	1.03971	2.58901
14	6.61	35.109	9	74	232.058	4810		1.48521
15	6.61	132.562	87	183	876.174	18161	1.5392	2.50749
16	6.61	86.124	20	170	569.241	11799		1.46095
17	6.61	53.985	24	80	356.819	7396	1.14153	1.95817
18	6.61	47.292	20	97	312.578	6479		1.38659
19	6.61	46.686	19	72	308.574	6396	1.44673	1.96953
20	6.61	32.27	10	75	213.29	4421		0.817593
21	6.61	114.131	78	156	754.356	15636	1.6831	1.38448
22	6.61	67.81	28	138	448.194	9290		1.71573
23	6.61	40.146	15	71	265.347	5500	1.01289	2.45043
24	6.61	39.635	10	68	261.969	5430		1.59648
25	6.61	115.504	47	205	763.426	15824	2.58901	1.25744
26	6.61	44.613	16	67	294.872	6112		1.47123
27	6.61	19.796	8	35	130.84	2712	1.48521	1.21239
28	6.61	13.328	0	33	88.095	1826		1.69883
29	6.61	56.19	30	89	371.389	7698	2.50749	1.25182
30	6.61	22.409	6	59	148.112	3070		1.57971
31	6.61	102.416	55	185	676.923	14031	1.46095	1.36091
32	6.61	70.102	22	121	463.343	9604		1.57405
33	6.61	80.985	41	117	535.276	11095	1.95817	1.88675
34	6.61	41.358	13	101	273.355	5666		1.68056
35	6.61	39.088	9	61	258.351	5355	1.38659	1.24963
36	6.61	28.19	14	60	186.322	3862		1.76096
37	6.61	29.255	12	61	193.365	4008	1.96953	1.43769
38	6.61	14.854	3	35	98.178	2035		1.83406
39	6.61	20.285	4	39	134.072	2779	0.817593	1.31751
40	6.61	24.81	8	49	163.984	3399		1.22729
41	6.61	128.635	80	201	850.219	17623	1.38448	2.07592
42	6.61	92.912	33	195	614.108	12729		2.16607
43	6.61	133	76	243	879.069	18221	1.71573	1.64915
44	6.61	77.518	25	191	512.36	10620		1.47684
45	6.61	80.292	55	107	530.693	11000	2.45043	1.10286
46	6.61	32.766	14	65	216.571	4489		1.67072
47	6.61	17.876	3	33	118.152	2449	1.59648	2.23041
48	6.61	11.197	0	24	74.008	1534		1.29643
49	6.61	24.35	7	44	160.945	3336	1.25744	1.36899
50	6.61	19.365	7	36	127.994	2653		1.86334
51	6.61	54.307	28	89	358.941	7440	1.47123	1.44827
52	6.61	36.912	11	91	243.974	5057		1.12224
53	6.61	39.708	22	64	262.452	5440	1.21239	0.880174
54	6.61	32.752	12	67	216.475	4487		2.01754
55	6.61	97.292	60	128	643.055	13329	1.69883	1.57579
56	6.61	57.27	23	109	378.529	7846		0.957711
57	6.61	33.927	12	58	224.242	4648	1.25182	1.67071
58	6.61	27.102	10	50	179.133	3713		1.71785
59	6.61	15.912	5	28	105.174	2180	1.57971	1.91058
60	6.61	10.073	1	23	66.578	1380		1.3666
61	6.61	20.891	9	39	138.077	2862	1.36091	1.16618
62	6.61	15.35	3	44	101.459	2103		1.60636
63	6.61	82.161	52	115	543.044	11256	1.57405	1.88719
64	6.61	52.197	25	84	344.999	7151		1.19083
65	6.61	92.299	58	139	610.056	12645	1.88675	1.96675
66	6.61	48.92	20	110	323.337	6702		1.67317
67	6.61	170.46	80	255	1126.66	23353	1.68056	1.53613
68	6.61	101.431	53	159	670.41	13896		1.74276
69	6.61	43.299	22	72	286.188	5932	1.24963	1.53568
70	6.61	34.65	14	59	229.018	4747		1.16504
71	6.61	82.65	42	137	546.276	11323	1.76096	1.68914
72	6.61	46.934	17	90	310.214	6430		1.4597
73	6.61	20.883	6	37	138.028	2861	1.43769	1.89388
74	6.61	14.526	3	34	96.007	1990		1.15087
75	6.61	178.693	88	255	1181.08	24481	1.83406	1.90257
76	6.61	97.431	17	199	643.972	13348
77	6.61	163.044	107	243	1077.64	22337	1.31751
78	6.61	123.752	59	218	817.943	16954
79	6.61	91.321	43	148	603.591	12511	1.22729
80	6.61	74.409	40	114	491.808	10194
81	6.61	91.007	54	127	601.516	12468	2.07592
82	6.61	43.839	20	80	289.758	6006
83	6.61	177.08	69	255	1170.42	24260	2.16607
84	6.61	81.752	28	158	540.342	11200
85	6.61	209.19	104	255	1382.65	28659	1.64915
86	6.61	126.847	85	180	838.399	17378
87	6.61	100.985	54	147	667.467	13835	1.47684
88	6.61	68.38	33	115	451.958	9368
89	6.61	147.759	67	246	976.62	20243	1.10286
90	6.61	133.978	46	255	885.534	18355
91	6.61	60.182	32	82	397.779	8245	1.67072
92	6.61	36.022	17	82	238.088	4935
93	6.61	91.219	51	140	602.916	12497	2.23041
94	6.61	40.898	15	83	270.316	5603
95	6.61	134.62	64	204	889.779	18443	1.29643
96	6.61	103.839	16	201	686.331	14226
97	6.61	212.234	142	255	1402.77	29076	1.36899
98	6.61	155.029	75	255	1024.67	21239
99	6.61	171.277	105	236	1132.07	23465	1.86334
100	6.61	91.92	45	151	607.547	12593
101	6.61	49.453	29	80	326.859	6775	1.44827
102	6.61	34.146	10	66	225.689	4678
103	6.61	125.445	78	198	829.136	17186	1.12224
104	6.61	111.781	54	200	738.821	15314
105	6.61	56.029	34	91	370.327	7676	0.880174
106	6.61	63.657	38	96	420.743	8721
107	6.61	19.307	7	49	127.608	2645	2.01754
108	6.61	9.569	1	25	63.249	1311
109	6.61	70.496	30	116	465.949	9658	1.57579
110	6.61	44.737	24	78	295.693	6129
111	6.61	30.912	12	54	204.317	4235	0.957711
112	6.61	32.277	17	58	213.339	4422
113	6.61	35.146	16	56	232.299	4815	1.67071
114	6.61	21.036	6	36	139.042	2882
115	6.61	159.409	98	237	1053.62	21839	1.71785
116	6.61	92.796	47	143	613.336	12713
117	6.61	145.971	85	201	964.8	19998	1.91058
118	6.61	76.401	27	124	504.979	10467
119	6.61	90.555	43	158	598.525	12406	1.3666
120	6.61	66.263	25	121	437.967	9078
121	6.61	51.993	22	78	343.648	7123	1.16618
122	6.61	44.584	23	74	294.679	6108
123	6.61	118.285	65	176	781.807	16205	1.60636
124	6.61	73.635	26	132	486.694	10088
125	6.61	190	118	255	1255.81	26030	1.88719
126	6.61	100.679	47	167	665.441	13793
127	6.61	22.182	6	51	146.616	3039	1.19083
128	6.61	18.628	5	36	123.121	2552
129	6.61	127.81	85	189	844.767	17510	1.96675
130	6.61	64.985	27	101	429.524	8903
131	6.61	165.766	92	250	1095.64	22710	1.67317
132	6.61	99.073	50	178	654.827	13573
133	6.61	79.453	50	122	525.145	10885	1.53613
134	6.61	51.723	8	102	341.863	7086
135	6.61	115.022	54	183	760.242	15758	1.74276
136	6.61	66	22	124	436.23	9042
137	6.61	103.058	55	177	681.169	14119	1.53568
138	6.61	67.109	33	107	443.563	9194
139	6.61	50.496	22	81	333.758	6918	1.16504
140	6.61	43.343	15	95	286.478	5938
141	6.61	44.066	13	74	291.254	6037	1.68914
142	6.61	26.088	3	69	172.427	3574
143	6.61	53.007	27	93	350.354	7262	1.4597
144	6.61	36.314	12	68	240.018	4975
145	6.61	116.328	74	182	768.878	15937	1.89388
146	6.61	61.423	29	106	405.98	8415
147	6.61	65.869	32	96	435.361	9024	1.15087
148	6.61	57.234	18	109	378.288	7841
149	6.61	25.372	7	45	167.699	3476	1.90257
150	6.61	13.336	0	39	88.143	1827
