# Supplementary material for: Kap-β2/Transportin mediates β-catenin nuclear transport in Wnt signaling
Source: eLife. 2022 Oct 27;11:e70495. doi: 10.7554/eLife.70495 (PMC9665845; doi:10.7554/eLife.70495)
Supplement: Figure 2—source data 1. [file elife-70495-fig2-data1.xlsx]

## Sheet: Figure 2B GFP
	area	mean	min	max	Int Den	Raw Int Den	N/C
1	0.743	119.757	102	137	89.007	21197	1.02169
2	0.743	117.215	98	139	87.117	20747
3	0.743	113.571	93	132	84.409	20102	0.980012
4	0.743	115.887	98	135	86.131	20512
5	0.743	123.39	109	143	91.707	21840	1.0253
6	0.743	120.345	100	137	89.444	21301
7	0.743	123.034	106	140	91.442	21777	1.05254
8	0.743	116.893	98	144	86.878	20690
9	0.743	119.96	101	141	89.158	21233	1.03591
10	0.743	115.802	99	135	86.068	20497
11	0.743	131.684	112	159	97.871	23308	1.00783
12	0.743	130.661	108	155	97.111	23127
13	0.743	125.525	104	147	93.294	22218	1.00429
14	0.743	124.989	109	145	92.895	22123
15	0.743	136.136	109	162	101.18	24096	1.01431
16	0.743	134.215	116	157	99.752	23756
17	0.743	124.237	105	146	92.337	21990	0.957753
18	0.743	129.718	115	159	96.41	22960
19	0.743	128.322	102	154	95.373	22713	1.01834
20	0.743	126.011	105	142	93.655	22304
21	0.743	133.277	113	157	99.055	23590	1.06042
22	0.743	125.684	105	160	93.412	22246
23	0.743	117.599	102	137	87.403	20815	0.96814
24	0.743	121.469	99	147	90.279	21500
25	0.743	121.785	101	142	90.515	21556	1.01598
26	0.743	119.87	96	143	89.091	21217
27	0.743	117.763	99	138	87.525	20844	1.02212
28	0.743	115.215	98	132	85.631	20393
29	0.743	119.87	103	135	89.091	21217	1.02113
30	0.743	117.39	99	144	87.248	20778
31	0.743	127.379	104	149	94.672	22546	1.00904
32	0.743	126.237	108	155	93.823	22344
33	0.743	123.424	104	153	91.732	21846	0.989402
34	0.743	124.746	104	146	92.715	22080
35	0.743	123.215	106	145	91.577	21809	1.02858
36	0.743	119.791	98	138	89.032	21203
37	0.743	126.017	105	145	93.66	22305	1.00527
38	0.743	125.356	110	147	93.168	22188
39	0.743	123.689	102	146	91.93	21893	1.01743
40	0.743	121.571	101	144	90.355	21518
41	0.743	119.395	99	144	88.738	21133	0.972661
42	0.743	122.751	102	152	91.233	21727
43	0.743	125.006	108	147	92.908	22126	1.01259
44	0.743	123.452	101	146	91.753	21851
45	0.743	123.424	101	145	91.732	21846	1.0169
46	0.743	121.373	104	141	90.208	21483
47	0.743	123.695	105	149	91.934	21894	1.02615
48	0.743	120.542	104	136	89.591	21336
49	0.743	130.994	115	148	97.359	23186	1.07682
50	0.743	121.65	104	143	90.414	21532
51	0.743	128.045	105	144	95.167	22664	1.00872
52	0.743	126.938	109	153	94.344	22468
53	0.743	123.915	102	146	92.098	21933	1.00046
54	0.743	123.859	103	143	92.056	21923
55	0.743	120.203	103	143	89.339	21276	1.04911
56	0.743	114.576	95	144	85.157	20280
57	0.743	134.576	110	165	100.021	23820	1.05937
58	0.743	127.034	108	151	94.415	22485
59	0.743	121.333	104	138	90.179	21476	1.00581
60	0.743	120.633	106	145	89.658	21352
61	0.743	121.034	104	144	89.956	21423	1.0584
62	0.743	114.356	100	130	84.993	20241
63	0.743	122.989	104	143	91.409	21769	0.985736
64	0.743	124.768	96	146	92.732	22084
65	0.743	123.831	106	149	92.035	21918	1.01816
66	0.743	121.621	105	141	90.393	21527
67	0.743	123.994	100	142	92.156	21947	0.988381
68	0.743	125.452	105	148	93.24	22205
69	0.743	129.497	108	155	96.246	22921	1.05345
70	0.743	122.927	99	142	91.363	21758
71	0.743	126.768	110	144	94.218	22438	1.00085
72	0.743	126.661	100	150	94.138	22419
73	0.743	121.486	104	137	90.292	21503	0.980753
74	0.743	123.87	108	150	92.064	21925
75	0.743	139.096	115	162	103.38	24620	1.02789
76	0.743	135.322	115	158	100.575	23952
77	0.743	122.136	105	143	90.775	21618	0.971639
78	0.743	125.701	110	152	93.424	22249
79	0.743	122.729	102	147	91.216	21723	1.00691
80	0.743	121.887	98	149	90.59	21574
81	0.743	121.593	104	139	90.372	21522	1.00537
82	0.743	120.944	107	138	89.889	21407
83	0.743	123.136	102	147	91.518	21795	1.03343
84	0.743	119.153	97	140	88.558	21090
85	0.743	142.362	122	166	105.807	25198	1.033
86	0.743	137.814	109	169	102.427	24393
87	0.743	129.893	108	149	96.54	22991	1.02542
88	0.743	126.672	110	146	94.147	22421
89	0.743	122.424	99	142	90.989	21669	1.00964
90	0.743	121.254	106	143	90.12	21462
91	0.743	124.61	106	142	92.614	22056	1.02173
92	0.743	121.96	106	154	90.645	21587
93	0.743	131.311	108	155	97.594	23242	1.03847
94	0.743	126.446	108	146	93.979	22381
95	0.743	122	100	142	90.674	21594	1.02506
96	0.743	119.017	98	143	88.457	21066
97	0.743	113.119	89	141	84.073	20022	0.987814
98	0.743	114.514	96	145	85.11	20269
99	0.743	119.768	95	141	89.015	21199	1.02808
100	0.743	116.497	102	134	86.584	20620
101	0.743	124.158	107	144	92.278	21976	0.986444
102	0.743	125.864	107	148	93.546	22278
103	0.743	123.729	103	146	91.959	21900	1.00046
104	0.743	123.672	107	151	91.917	21890
105	0.743	125.04	100	147	92.933	22132	1.07982
106	0.743	115.797	99	137	86.064	20496
107	0.743	120.379	103	139	89.469	21307	0.9919
108	0.743	121.362	103	140	90.2	21481
109	4.56	223.503	190	254	1019.08	39560	1.0577
110	4.56	211.311	181	247	963.485	37402
111	4.56	223.119	183	253	1017.32	39492	0.957451
112	4.56	233.034	206	271	1062.53	41247
113	4.56	195.096	174	220	889.553	34532	1.03703
114	4.56	188.13	145	233	857.791	33299
115	4.56	211.492	176	248	964.309	37434	1.08492
116	4.56	194.938	155	225	888.832	34504
117	4.56	191.486	172	215	873.092	33893	1.20999
118	4.56	158.254	134	194	721.57	28011
119	4.56	182.785	159	213	833.421	32353	0.958068
120	4.56	190.785	158	217	869.898	33769
121	4.56	200.571	158	225	914.515	35501	0.999212
122	4.56	200.729	170	235	915.236	35529
123	4.56	217.492	180	246	991.667	38496	1.07911
124	4.56	201.548	172	231	918.971	35674
125	4.56	233.932	206	269	1066.63	41406	0.933956
126	4.56	250.475	206	285	1142.06	44334
127	4.56	236.215	189	277	1077.04	41810	1.16071
128	4.56	203.508	176	232	927.91	36021
129	4.56	200.514	170	225	914.257	35491	1.0642
130	4.56	188.418	163	223	859.104	33350
131	4.56	203.271	180	241	926.828	35979	1.1047
132	4.56	184.006	160	214	838.986	32569
133	4.56	196.746	173	220	897.075	34824	1.07858
134	4.56	182.412	155	203	831.721	32287
135	4.56	253.181	221	288	1154.39	44813	1.07781
136	4.56	234.904	178	280	1071.06	41578
137	4.56	227.723	196	261	1038.32	40307	1.06326
138	4.56	214.175	188	247	976.545	37909
139	4.56	233.102	189	267	1062.84	41259	1.03901
140	4.56	224.35	197	253	1022.94	39710
141	4.56	199.395	175	226	909.157	35293	1.07345
142	4.56	185.751	161	216	846.945	32878
143	4.56	193.463	169	229	882.108	34243	1.00973
144	4.56	191.599	152	225	873.607	33913
145	4.56	215.582	175	247	982.96	38158	1.10963
146	4.56	194.282	167	227	885.843	34388
147	4.56	199.215	164	227	908.332	35261	1.12132
148	4.56	177.661	156	208	810.057	31446
149	4.56	227.35	199	260	1036.62	40241	1.10787
150	4.56	205.215	177	237	935.69	36323
151	4.56	177.26	143	200	808.228	31375	1.03527
152	4.56	171.22	148	192	780.69	30306
153	4.56	209.531	186	234	955.37	37087	1.05884
154	4.56	197.887	175	225	902.279	35026
155	4.56	196.898	173	221	897.77	34851	0.991748
156	4.56	198.537	164	233	905.241	35141
157	4.56	205.944	161	243	939.013	36452	1.02201
158	4.56	201.508	175	228	918.791	35667
159	4.56	220.966	187	255	1007.51	39111	1.12372
160	4.56	196.638	176	231	896.586	34805
161	4.56	203.226	173	244	926.622	35971	0.945958
162	4.56	214.836	182	253	979.559	38026
163	4.56	199.627	179	233	910.213	35334	1.20401
164	4.56	165.802	138	207	755.986	29347
165	4.56	214.605	194	245	978.503	37985	1.04653
166	4.56	205.062	176	232	934.994	36296
167	4.56	188.017	171	210	857.275	33279	1.00129
168	4.56	187.774	173	212	856.168	33236
169	4.56	202.638	176	238	923.943	35867	0.977196
170	4.56	207.367	172	259	945.504	36704
171	4.56	199.531	173	223	909.775	35317	1.21077
172	4.56	164.797	127	195	751.401	29169
173	4.56	239.593	208	270	1092.44	42408	1.12593
174	4.56	212.797	179	250	970.26	37665
175	4.56	189.26	158	216	862.943	33499	0.987443
176	4.56	191.667	170	222	873.916	33925
177	4.56	202.401	180	232	922.861	35825	1.15676
178	4.56	174.972	149	214	797.795	30970
179	4.56	209.847	182	238	956.813	37143	1.00514
180	4.56	208.774	168	242	951.919	36953
181	4.56	204.085	181	228	930.538	36123	1.07515
182	4.56	189.819	163	221	865.493	33598
183	4.56	211.412	181	245	963.949	37420	1.1538
184	4.56	183.232	157	208	835.456	32432
185	4.56	238.847	204	270	1089.04	42276	1.14038
186	4.56	209.446	154	246	954.984	37072
187	4.56	179.22	153	214	817.167	31722	1.0505
188	4.56	170.605	145	198	777.882	30197
189	4.56	197.881	173	223	902.253	35025	1.16563
190	4.56	169.763	133	204	774.044	30048
191	4.56	201.847	173	237	920.336	35727	1.01428
192	4.56	199.006	169	228	907.379	35224
193	4.56	228.599	202	256	1042.31	40462	1.02891
194	4.56	222.175	194	249	1013.02	39325
195	4.56	209.537	183	242	955.396	37088	1.10276
196	4.56	190.011	164	220	866.369	33632
197	4.56	186.814	163	213	851.788	33066	1.02125
198	4.56	182.927	159	205	834.065	32378
199	4.56	229.181	205	260	1044.96	40565	1.21572
200	4.56	188.514	160	216	859.542	33367
201	4.56	215.328	187	248	981.8	38113	1.05418
202	4.56	204.26	179	232	931.336	36154
203	4.56	246.91	204	296	1125.8	43703	1.02964
204	4.56	239.802	194	284	1093.39	42445
205	4.56	246.096	211	282	1122.09	43559	1.04765
206	4.56	234.904	201	273	1071.06	41578
207	4.56	203.034	182	234	925.746	35937	1.2369
208	4.56	164.147	138	188	748.438	29054
209	4.56	215.395	187	259	982.11	38125	1.04753
210	4.56	205.621	180	241	937.544	36395
211	4.56	215.825	183	249	984.067	38201	1.14663
212	4.56	188.226	149	223	858.228	33316
213	4.56	193.04	167	222	880.176	34168	1.06379
214	4.56	181.463	156	208	827.393	32119
215	4.56	195.966	176	219	893.52	34686	1.0855
216	4.56	180.531	144	212	823.143	31954
217	4.56	190.136	155	228	866.935	33654	1.06218
218	4.56	179.006	156	220	816.188	31684
219	4.56	180.949	156	208	825.049	32028	0.971605
220	4.56	186.237	163	214	849.161	32964

## Sheet: Figure 2B 1-782
	area	mean	min	max	Int Den	Raw Int Den	N/C
1	0.743	258.695	220	310	192.27	45789	1.61724
2	0.743	159.96	120	200	118.887	28313
3	0.743	273.814	194	524	203.506	48465	1.58139
4	0.743	173.147	139	203	128.688	30647
5	0.743	309.531	184	586	230.053	54787	1.66445
6	0.743	185.966	157	236	138.216	32916
7	0.743	303.401	237	463	225.497	53702	1.51444
8	0.743	200.339	169	248	148.898	35460
9	0.743	317.927	186	409	236.293	56273	1.62676
10	0.743	195.435	146	229	145.253	34592
11	0.743	307.39	231	399	228.461	54408	1.57362
12	0.743	195.339	142	235	145.182	34575
13	0.743	313.486	249	375	232.992	55487	1.51811
14	0.743	206.497	161	248	153.475	36550
15	0.743	325.282	229	423	241.76	57575	1.53329
16	0.743	212.147	173	243	157.674	37550
17	0.743	291.621	243	342	216.742	51617	1.44194
18	0.743	202.243	162	244	150.313	35797
19	0.743	250.842	211	295	186.433	44399	1.4138
20	0.743	177.424	149	221	131.867	31404
21	0.743	283.91	231	379	211.01	50252	1.66762
22	0.743	170.249	117	204	126.534	30134
23	0.743	317.559	262	445	236.02	56208	1.62597
24	0.743	195.305	128	242	145.157	34569
25	0.743	316.983	253	366	235.591	56106	1.50301
26	0.743	210.898	164	252	156.746	37329
27	0.743	302.232	218	422	224.628	53495	1.44055
28	0.743	209.802	170	261	155.931	37135
29	0.743	271.339	233	342	201.667	48027	1.49991
30	0.743	180.904	140	210	134.453	32020
31	0.743	281.989	234	340	209.582	49912	1.41422
32	0.743	199.395	154	234	148.197	35293
33	0.743	345.949	271	674	257.12	61233	2.00665
34	0.743	172.401	132	214	128.134	30515
35	0.743	302.181	226	526	224.59	53486	1.48742
36	0.743	203.158	161	236	150.993	35959
37	0.743	362.932	310	557	269.742	64239	1.67643
38	0.743	216.492	178	255	160.903	38319
39	0.743	312.616	211	474	232.345	55333	1.54092
40	0.743	202.876	159	248	150.783	35909
41	0.743	347.192	249	641	258.044	61453	1.65218
42	0.743	210.141	177	252	156.183	37195
43	0.743	332.785	262	443	247.336	58903	1.66271
44	0.743	200.147	168	228	148.755	35426
45	0.743	311.949	251	558	231.85	55215	1.76535
46	0.743	176.706	145	224	131.333	31277
47	0.743	358.13	295	520	266.173	63389	1.52191
48	0.743	235.316	189	274	174.894	41651
49	0.743	371.469	230	616	276.087	65750	1.66641
50	0.743	222.915	164	260	165.677	39456
51	0.743	305.04	233	418	226.715	53992	1.46272
52	0.743	208.542	165	242	154.995	36912
53	0.743	358.48	241	501	266.433	63451	1.94498
54	0.743	184.311	159	226	136.985	32623
55	0.743	376.339	315	453	279.706	66612	1.6123
56	0.743	233.418	195	280	173.483	41315
57	0.743	319.588	260	442	237.527	56567	1.65822
58	0.743	192.729	162	232	143.242	34113
59	0.743	392.096	235	612	291.418	69401	1.62883
60	0.743	240.723	208	277	178.913	42608
61	0.743	296.13	241	357	220.093	52415	1.57995
62	0.743	187.429	140	233	139.303	33175
63	0.743	331.904	262	406	246.681	58747	1.53716
64	0.743	215.921	166	267	160.479	38218
65	0.743	298.407	212	387	221.785	52818	1.44134
66	0.743	207.034	170	244	153.874	36645
67	0.743	279.542	216	499	207.764	49479	1.51609
68	0.743	184.384	147	225	137.04	32636
69	0.743	279.04	198	442	207.391	49390	1.494
70	0.743	186.774	151	227	138.816	33059
71	0.743	296.864	244	384	220.639	52545	1.38233
72	0.743	214.757	186	257	159.614	38012
73	0.743	278.65	218	352	207.101	49321	1.49798
74	0.743	186.017	149	220	138.253	32925
75	0.743	277.107	215	351	205.955	49048	1.51103
76	0.743	183.39	144	232	136.301	32460
77	0.743	272.266	232	325	202.356	48191	1.35971
78	0.743	200.237	165	252	148.822	35442
79	0.743	300.136	245	373	223.07	53124	1.60588
80	0.743	186.898	138	227	138.908	33081
81	0.743	286.91	221	340	213.24	50783	1.43735
82	0.743	199.61	165	234	148.356	35331
83	0.743	264.249	236	303	196.397	46772	1.45548
84	0.743	181.554	151	215	134.936	32135
85	0.743	313.288	237	383	232.845	55452	1.39847
86	0.743	224.023	192	267	166.5	39652
87	0.743	316.757	255	380	235.423	56066	1.48602
88	0.743	213.158	163	253	158.426	37729
89	0.743	292.158	211	386	217.141	51712	1.36224
90	0.743	214.469	158	248	159.4	37961
91	0.743	307.305	249	366	228.398	54393	1.49468
92	0.743	205.599	179	242	152.807	36391
93	0.743	317.734	260	402	236.15	56239	1.46414
94	0.743	217.011	177	259	161.289	38411
95	0.743	280.441	228	356	208.432	49638	1.4433
96	0.743	194.305	158	224	144.413	34392
97	0.743	352.017	269	426	261.63	62307	1.43956
98	0.743	244.531	200	303	181.743	43282
99	0.743	347.158	261	413	258.018	61447	1.39814
100	0.743	248.299	193	308	184.544	43949
101	0.743	281.633	241	334	209.318	49849	1.39449
102	0.743	201.96	161	241	150.103	35747
103	0.743	289.514	224	365	215.176	51244	1.53255
104	0.743	188.91	164	236	140.403	33437
105	0.743	331.559	216	389	246.425	58686	1.55069
106	0.743	213.814	177	251	158.913	37845
107	0.743	337.497	244	961	250.838	59737	1.82264
108	0.743	185.169	149	225	137.624	32775
109	0.743	295.362	241	377	219.522	52279	1.64622
110	0.743	179.418	149	226	133.349	31757
111	0.743	306.107	238	364	227.508	54181	1.54283
112	0.743	198.407	143	236	147.462	35118
113	0.743	315.249	235	519	234.302	55799	1.60841
114	0.743	196	151	244	145.673	34692
115	0.743	265.893	225	311	197.619	47063	1.42133
116	0.743	187.073	142	231	139.039	33112
117	0.743	295.395	248	355	219.547	52285	1.42164
118	0.743	207.785	176	245	154.432	36778
119	0.743	364.599	309	428	270.981	64534	1.65765
120	0.743	219.949	171	272	163.473	38931
121	0.743	350.52	264	651	260.517	62042	1.54399
122	0.743	227.023	190	260	168.73	40183
123	0.743	328.35	276	400	244.04	58118	1.90501
124	0.743	172.362	111	225	128.104	30508
125	0.743	317.395	265	386	235.898	56179	1.66906
126	0.743	190.164	128	229	141.335	33659
127	0.743	303.119	223	379	225.287	53652	1.52663
128	0.743	198.554	155	238	147.571	35144
129	0.743	280.695	217	326	208.621	49683	1.566
130	0.743	179.243	141	216	133.219	31726
131	0.743	288.831	250	348	214.668	51123	1.4236
132	0.743	202.887	174	252	150.792	35911
133	0.743	307.068	219	360	228.222	54351	1.49025
134	0.743	206.051	131	265	153.143	36471
135	0.743	251.023	210	296	186.568	44431	1.48281
136	0.743	169.288	137	199	125.82	29964
137	0.743	338.299	285	389	251.434	59879	1.6049
138	0.743	210.791	170	240	156.666	37310
139	0.743	313.124	265	370	232.723	55423	1.43952
140	0.743	217.52	186	262	161.667	38501
141	0.743	328.582	218	643	244.212	58159	1.70504
142	0.743	192.712	162	225	143.229	34110
143	0.743	266.492	204	313	198.065	47169	1.42699
144	0.743	186.751	133	232	138.799	33055
145	0.743	300.616	220	367	223.427	53209	1.49066
146	0.743	201.667	140	245	149.885	35695
147	0.743	318.571	184	477	236.771	56387	1.58151
148	0.743	201.435	174	239	149.713	35654
149	0.743	297.282	184	397	220.949	52619	1.41796
150	0.743	209.655	171	245	155.822	37109
151	0.743	290.322	240	348	215.776	51387	1.41453
152	0.743	205.243	154	246	152.543	36328
153	0.743	304.153	256	379	226.055	53835	1.70299
154	0.743	178.599	150	206	132.74	31612
155	0.743	313.407	213	515	232.933	55473	1.61748
156	0.743	193.763	168	227	144.01	34296
157	0.743	339.599	274	430	252.4	60109	1.58599
158	0.743	214.124	177	259	159.144	37900
159	0.743	323.322	236	412	240.303	57228	1.64123
160	0.743	197	150	241	146.416	34869
161	0.743	345.797	273	464	257.006	61206	1.74974
162	0.743	197.627	165	223	146.882	34980
163	0.743	266.712	233	310	198.228	47208	1.44239
164	0.743	184.91	148	231	137.43	32729
165	0.743	314.554	207	465	233.786	55676	1.57638
166	0.743	199.542	165	251	148.306	35319
167	0.743	272.542	217	336	202.562	48240	1.50061
168	0.743	181.621	159	214	134.987	32147
169	0.743	406.514	310	636	302.134	71953	1.77071
170	0.743	229.576	194	266	170.628	40635
171	0.743	284.266	239	348	211.275	50315	1.67689
172	0.743	169.52	135	207	125.992	30005
173	0.743	295.051	159	909	219.291	52224	1.6607
174	0.743	177.667	148	211	132.047	31447
175	0.743	303.718	171	1816	225.732	53758	1.78901
176	0.743	169.768	138	202	126.177	30049
177	0.743	342.977	157	963	254.911	60707	1.99931
178	0.743	171.548	142	212	127.5	30364
179	0.743	318.599	268	388	236.792	56392	1.59129
180	0.743	200.215	151	243	148.806	35438
181	0.743	281.977	210	474	209.574	49910	1.74218
182	0.743	161.853	126	197	120.294	28648
183	0.743	332.706	142	819	247.277	58889	1.53165
184	0.743	217.22	186	253	161.445	38448
185	0.743	291.701	245	347	216.801	51631	1.48664
186	0.743	196.215	165	234	145.833	34730
187	0.743	354.78	257	767	263.683	62796	1.55655
188	0.743	227.927	180	283	169.402	40343
189	0.743	358.373	253	695	266.354	63432	1.70713
190	0.743	209.927	179	243	156.024	37157
191	0.743	309.085	222	396	229.721	54708	1.47788
192	0.743	209.141	174	244	155.44	37018
193	0.743	290.107	177	471	215.617	51349	1.35393
194	0.743	214.271	180	254	159.253	37926
195	0.743	309.096	199	494	229.729	54710	1.40896
196	0.743	219.379	188	255	163.049	38830
197	0.743	307.045	203	489	228.205	54347	1.69
198	0.743	181.684	148	220	135.033	32158
199	0.743	377.768	181	725	280.769	66865	1.71085
200	0.743	220.808	187	275	164.111	39083
201	0.743	282.062	194	404	209.637	49925	1.39067
202	0.743	202.825	175	246	150.746	35900
203	0.743	326.621	275	368	242.755	57812	1.54573
204	0.743	211.305	151	261	157.048	37401
205	0.743	338.644	212	1030	251.69	59940	1.49906
206	0.743	225.904	189	280	167.899	39985
207	0.743	291.299	208	517	216.503	51560	1.63402
208	0.743	178.271	150	223	132.497	31554
209	0.743	234.446	188	270	174.248	41497	1.45742
210	0.743	160.864	139	183	119.559	28473
211	0.743	286.554	210	419	212.975	50720	1.68527
212	0.743	170.034	134	218	126.374	30096

## Sheet: Figure 2B 1-664
	area	Min	Max	IntDen	RawIntDen	Raw N/C
1	0.805	201	286	206.535	20526	1.35853
2	0.805	168	214	152.028	15109
3	0.805	292	384	275.46	27376	1.3495
4	0.805	231	285	204.12	20286
5	0.805	209	278	205.931	20466	1.43965
6	0.805	160	200	143.043	14216
7	0.805	296	372	267.662	26601	1.47138
8	0.805	196	247	181.913	18079
9	0.805	290	360	265.026	26339	1.40497
10	0.805	195	272	188.634	18747
11	0.805	277	377	271.435	26976	1.48808
12	0.805	184	268	182.406	18128
13	0.805	324	437	300.022	29817	1.48041
14	0.805	189	290	202.661	20141
15	0.805	263	341	241.47	23998	1.45266
16	0.805	180	238	166.226	16520
17	0.805	252	334	233.119	23168	1.31509
18	0.805	193	244	177.264	17617
19	0.805	230	316	215.51	21418	1.16409
20	0.805	206	254	185.133	18399
21	0.805	252	318	226.951	22555	1.44334
22	0.805	171	235	157.24	15627
23	0.805	273	343	248.453	24692	1.53979
24	0.805	170	233	161.356	16036
25	0.805	263	328	233.692	23225	1.40104
26	0.805	181	250	166.799	16577
27	0.805	231	296	209.986	20869	1.36873
28	0.805	161	209	153.417	15247
29	0.805	349	430	308.061	30616	1.73413
30	0.805	173	278	177.646	17655
31	0.805	287	359	262.671	26105	1.57667
32	0.805	188	229	166.598	16557
33	0.805	231	317	226.468	22507	1.44322
34	0.805	157	232	156.918	15595
35	0.805	211	298	207.571	20629	1.32714
36	0.805	173	214	156.405	15544
37	0.805	209	329	219.253	21790	1.29494
38	0.805	175	245	169.315	16827
39	0.805	179	232	165.984	16496	1.27886
40	0.805	138	190	129.791	12899
41	0.805	176	242	169.577	16853	1.34223
42	0.805	142	175	126.34	12556
43	0.805	254	328	234.869	23342	1.30082
44	0.805	189	249	180.554	17944
45	0.805	263	361	248.494	24696	1.3368
46	0.805	200	276	185.887	18474
47	0.805	268	385	262.872	26125	1.47432
48	0.805	167	252	178.3	17720
49	0.805	272	350	247.457	24593	1.48383
50	0.805	182	237	166.769	16574
51	0.805	251	318	225.19	22380	1.35636
52	0.805	183	226	166.025	16500
53	0.805	313	404	291.288	28949	1.48115
54	0.805	210	285	196.664	19545
55	0.805	309	399	279.636	27791	1.72948
56	0.805	167	241	161.688	16069
57	0.805	270	388	261.293	25968	1.39718
58	0.805	188	267	187.014	18586
59	0.805	260	354	248.876	24734	1.39787
60	0.805	200	246	178.039	17694
61	0.805	282	360	255.839	25426	1.36165
62	0.805	208	262	187.89	18673
63	0.805	271	357	252.83	25127	1.46385
64	0.805	187	250	172.716	17165
65	0.805	269	336	248.373	24684	1.72966
66	0.805	140	205	143.596	14271
67	0.805	249	312	222.252	22088	1.33932
68	0.805	184	227	165.944	16492
69	0.805	231	338	236.439	23498	1.53662
70	0.805	171	212	153.87	15292
71	0.805	280	344	248.896	24736	1.41778
72	0.805	191	247	175.553	17447
73	0.805	263	326	234.749	23330	1.4118
74	0.805	185	227	166.276	16525
75	0.805	260	366	248.121	24659	1.39656
76	0.805	195	244	177.666	17657
77	0.805	268	332	238.643	23717	1.43853
78	0.805	174	250	165.894	16487
79	0.805	219	298	197.982	19676	1.31025
80	0.805	163	209	151.102	15017
81	0.805	260	323	234.869	23342	1.44981
82	0.805	170	237	162	16100
83	0.805	256	344	235.503	23405	1.4274
84	0.805	182	238	164.988	16397
85	0.805	282	344	248.403	24687	1.57062
86	0.805	159	221	158.156	15718
87	0.805	223	324	220.954	21959	1.40457
88	0.805	176	219	157.311	15634
89	0.805	334	406	299.961	29811	1.60862
90	0.805	205	267	186.471	18532
91	0.805	267	381	252.206	25065	1.47035
92	0.805	180	237	171.529	17047
93	0.805	246	311	224.677	22329	1.41771
94	0.805	173	223	158.478	15750
95	0.805	313	402	289.014	28723	1.55343
96	0.805	206	265	186.048	18490
97	0.805	275	354	257.791	25620	1.57313
98	0.805	180	233	163.871	16286
99	0.805	287	398	266.163	26452	1.58823
100	0.805	187	236	167.584	16655
101	0.805	234	300	210.761	20946	1.23553
102	0.805	184	239	170.583	16953
103	0.743	159	243	150.376	35812	1.21508
104	0.743	135	191	123.758	29473
105	0.743	168	264	158.165	37667	1.26103
106	0.743	135	195	125.425	29870
107	0.743	150	248	142.91	34034	1.17854
108	0.743	135	198	121.26	28878
109	0.743	146	219	131.552	31329	1.20343
110	0.743	120	175	109.314	26033
111	0.743	193	261	164.082	39076	1.32474
112	0.743	145	196	123.859	29497
113	0.743	173	256	158.971	37859	1.22823
114	0.743	147	211	129.431	30824
115	0.743	155	255	151.107	35986	1.16377
116	0.743	143	214	129.843	30922
117	0.743	157	237	144.691	34458	1.20655
118	0.743	130	199	119.92	28559
119	0.743	174	251	152.841	36399	1.30922
120	0.743	129	182	116.742	27802
121	0.743	191	297	172.354	41046	1.25163
122	0.743	148	223	137.703	32794
123	0.743	180	278	177.447	42259	1.2887
124	0.743	137	229	137.695	32792
125	0.743	170	263	162.079	38599	1.27875
126	0.743	142	195	126.748	30185
127	0.743	194	272	173.437	41304	1.34121
128	0.743	148	207	129.314	30796
129	0.743	163	226	146.08	34789	1.19149
130	0.743	132	193	122.604	29198
131	0.743	137	193	122.272	29119	1.16434
132	0.743	116	171	105.014	25009
133	0.743	165	264	158.782	37814	1.29023
134	0.743	138	203	123.065	29308
135	0.743	156	227	140.181	33384	1.31092
136	0.743	116	166	106.933	25466
137	0.743	157	234	139.299	33174	1.29278
138	0.743	120	177	107.752	25661
139	0.743	160	224	144.426	34395	1.16811
140	0.743	143	189	123.641	29445
141	0.743	215	282	183.947	43807	1.35136
142	0.743	149	220	136.12	32417
143	0.743	215	301	187.726	44707	1.42848
144	0.743	130	218	131.417	31297
145	0.743	172	257	154.117	36703	1.22482
146	0.743	134	201	125.828	29966
147	0.743	172	245	153.819	36632	1.25328
148	0.743	134	189	122.734	29229
149	0.743	175	269	155.113	36940	1.20193
150	0.743	140	204	129.053	30734
151	0.743	165	249	151.304	36033	1.18823
152	0.743	141	202	127.336	30325
153	0.743	200	278	176.292	41984	1.33261
154	0.743	147	215	132.291	31505
155	0.743	321	452	283.565	67531	1.27012
156	0.743	249	356	223.259	53169
157	0.743	338	489	301.655	71839	1.46154
158	0.743	236	331	206.395	49153
159	0.743	247	447	255.386	60820	1.23382
160	0.743	200	336	206.987	49294
161	0.743	319	543	291.472	69414	1.48137
162	0.743	231	306	196.759	46858
163	0.743	336	486	302.016	71925	1.41691
164	0.743	194	356	213.152	50762
165	0.743	270	470	260.105	61944	1.32204
166	0.743	231	318	196.746	46855
167	0.743	308	475	279.123	66473	1.31372
168	0.743	236	373	212.467	50599
169	0.743	271	393	247.496	58941	1.36887
170	0.743	201	280	180.802	43058
171	0.743	290	450	277.943	66192	1.38747
172	0.743	230	314	200.324	47707
173	0.743	257	424	246.387	58677	1.37601
174	0.743	188	286	179.06	42643
175	0.743	233	367	216.158	51478	1.37701
176	0.743	143	263	156.977	37384
177	0.743	290	551	350.154	83389	1.58026
178	0.743	265	351	221.579	52769
179	0.743	293	521	280.341	66763	1.4725
180	0.743	210	293	190.384	45340
181	0.743	309	433	280.152	66718	1.41475
182	0.743	235	318	198.023	47159
183	0.743	286	461	270.154	64337	1.33446
184	0.743	211	312	202.444	48212
185	0.743	248	492	260.021	61924	1.38821
186	0.743	197	291	187.307	44607
187	0.743	342	565	312.249	74362	1.43442
188	0.743	201	356	217.682	51841
189	0.743	298	428	267.374	63675	1.49827
190	0.743	188	292	178.455	42499
191	0.743	234	393	231.233	55068	1.35957
192	0.743	176	300	170.078	40504
193	0.743	264	384	235.541	56094	1.21631
194	0.743	225	295	193.651	46118
195	0.743	224	364	215.092	51224	1.24879
196	0.743	168	282	172.24	41019
197	0.743	42	380	203.653	48500	1.01107
198	0.743	227	314	201.424	47969
199	0.743	212	587	212.652	50643	1.5102
200	0.743	140	240	140.811	33534
201	0.743	237	441	229.011	54539	1.39486
202	0.743	180	258	164.182	39100
203	0.743	261	405	247.441	58928	1.38384
204	0.743	198	274	178.808	42583
205	0.743	318	468	279.786	66631	1.3752
206	0.743	221	341	203.452	48452

## Sheet: Figure 2B 141-782
	area	Min	Max	IntDen	RawIntDen	Raw N/C
1	0.805	455	636	421.843	41924	1.99676
2	0.805	232	298	211.264	20996
3	0.805	436	581	415.786	41322	1.73149
4	0.805	253	342	240.132	23865
5	0.805	393	513	358.754	35654	1.54453
6	0.805	262	324	232.273	23084
7	0.805	367	477	339.817	33772	1.67321
8	0.805	217	287	203.093	20184
9	0.805	421	535	395.481	39304	1.88463
10	0.805	226	315	209.845	20855
11	0.805	368	501	355.786	35359	1.58525
12	0.805	240	314	224.435	22305
13	0.805	457	688	452.03	44924	1.83064
14	0.805	268	344	246.924	24540
15	0.805	281	349	253.716	25215	1.37314
16	0.805	206	258	184.77	18363
17	0.805	425	532	375.296	37298	1.52842
18	0.805	258	346	245.545	24403
19	0.805	400	583	401.84	39936	1.71812
20	0.805	242	337	233.883	23244
21	0.805	431	1178	439.895	43718	1.74572
22	0.805	266	354	251.985	25043
23	0.805	359	473	332.12	33007	1.79659
24	0.805	190	261	184.861	18372
25	0.805	352	456	320.246	31827	1.55732
26	0.805	220	290	205.639	20437
27	0.805	353	433	312.388	31046	1.7421
28	0.805	192	255	179.317	17821
29	0.805	387	493	348.823	34667	1.56165
30	0.805	241	325	223.368	22199
31	0.805	313	460	297.446	29561	1.59608
32	0.805	198	276	186.36	18521
33	0.805	525	640	458.983	45615	2.04827
34	0.805	244	306	224.083	22270
35	0.805	369	579	364.499	36225	2.03203
36	0.805	203	251	179.377	17827
37	0.805	477	622	444.845	44210	1.70412
38	0.805	271	369	261.041	25943
39	0.805	464	620	428.364	42572	1.83547
40	0.805	250	345	233.38	23194
41	0.805	482	616	445.379	44263	1.64266
42	0.805	307	362	271.133	26946
43	0.805	394	534	352.606	35043	1.61043
44	0.805	231	302	218.951	21760
45	0.805	379	506	363.04	36080	1.65908
46	0.805	244	303	218.82	21747
47	0.805	358	470	322.993	32100	1.74589
48	0.805	201	263	185.002	18386
49	0.805	425	566	402.252	39977	1.93471
50	0.805	235	310	207.913	20663
51	0.805	436	555	404.064	40157	1.97672
52	0.805	221	282	204.411	20315
53	0.805	321	434	317.731	31577	1.82854
54	0.805	191	252	173.762	17269
55	0.805	388	492	345.381	34325	1.5713
56	0.805	240	301	219.806	21845
57	0.805	367	554	376.483	37416	1.65836
58	0.805	251	313	227.021	22562
59	0.805	338	448	324.825	32282	1.66273
60	0.805	203	290	195.356	19415
61	0.805	356	448	328.749	32672	1.57062
62	0.805	224	295	209.312	20802
63	0.805	366	434	319.099	31713	1.76733
64	0.805	191	271	180.554	17944
65	0.805	366	514	346.881	34474	1.77719
66	0.805	206	277	195.185	19398
67	0.805	362	465	334.846	33278	1.68847
68	0.805	220	287	198.314	19709
69	0.805	412	523	373.425	37112	1.66138
70	0.805	255	320	224.767	22338
71	0.805	499	612	442.823	44009	1.90433
72	0.805	218	336	232.535	23110
73	0.805	369	458	332.291	33024	1.86429
74	0.805	197	246	178.24	17714
75	0.805	289	379	269.845	26818	1.63894
76	0.805	181	232	164.646	16363
77	0.805	315	412	286.911	28514	1.61178
78	0.805	201	252	178.009	17691
79	0.805	280	420	278.609	27689	1.56188
80	0.805	191	258	178.381	17728
81	0.805	279	358	261.192	25958	1.53145
82	0.805	186	252	170.553	16950
83	0.805	333	408	299.217	29737	1.7513
84	0.805	184	250	170.854	16980
85	0.805	306	382	282.473	28073	1.62789
86	0.805	183	249	173.521	17245
87	0.805	369	451	326.968	32495	1.80307
88	0.805	197	252	181.339	18022
89	0.805	357	458	333.548	33149	1.63231
90	0.805	230	284	204.341	20308
91	0.805	357	464	326.082	32407	1.69999
92	0.805	204	272	191.814	19063
93	0.805	334	415	302.597	30073	1.56142
94	0.805	206	282	193.796	19260
95	0.805	338	437	312.539	31061	1.50002
96	0.805	234	281	208.356	20707
97	0.805	336	470	327.179	32516	1.52514
98	0.805	229	302	214.524	21320
99	0.743	288	411	253.475	60365	1.56244
100	0.743	181	261	162.23	38635
101	0.743	296	452	268.226	63878	1.37834
102	0.743	218	340	194.6	46344
103	0.743	296	424	258.585	61582	1.49663
104	0.743	194	283	172.778	41147
105	0.743	281	381	247.605	58967	1.51155
106	0.743	193	250	163.809	39011
107	0.743	243	359	230.83	54972	1.48248
108	0.743	174	244	155.705	37081
109	0.743	280	424	257.557	61337	1.56137
110	0.743	155	264	164.955	39284
111	0.743	267	419	252.232	60069	1.40299
112	0.743	193	283	179.782	42815
113	0.743	306	421	266.198	63395	1.44523
114	0.743	201	300	184.191	43865
115	0.743	324	504	284.145	67669	1.33128
116	0.743	233	355	213.437	50830
117	0.743	357	496	320.517	76331	1.54254
118	0.743	246	330	207.785	49484
119	0.743	307	678	293.698	69944	1.63719
120	0.743	194	292	179.391	42722
121	0.743	273	813	274.827	65450	1.5706
122	0.743	203	284	174.982	41672
123	0.743	315	546	297.237	70787	1.76588
124	0.743	190	274	168.323	40086
125	0.743	294	387	255.386	60820	1.4462
126	0.743	208	276	176.591	42055
127	0.743	262	431	226.614	53968	1.6605
128	0.743	152	217	136.473	32501
129	0.743	281	499	269.671	64222	1.54748
130	0.743	196	298	174.264	41501
131	0.743	308	596	287.953	68576	1.70324
132	0.743	152	273	169.062	40262
133	0.743	284	414	254.743	60667	1.55254
134	0.743	185	268	164.082	39076
135	0.743	332	669	337.771	80440	1.90571
136	0.743	208	289	177.241	42210
137	0.743	260	380	227.37	54148	1.53159
138	0.743	147	235	148.453	35354
139	0.743	312	493	284.854	67838	1.72283
140	0.743	161	260	165.341	39376
141	0.743	289	414	269.709	64231	1.51395
142	0.743	209	274	178.148	42426
143	0.743	230	323	207.281	49364	1.40091
144	0.743	158	237	147.962	35237
145	0.743	240	340	222.108	52895	1.55615
146	0.743	144	239	142.73	33991
147	0.743	213	321	187.307	44607	1.31923
148	0.743	156	225	141.982	33813
149	0.743	225	310	196.213	46728	1.35087
150	0.743	160	227	145.249	34591
151	0.743	233	458	220.059	52407	1.46266
152	0.743	172	234	150.452	35830
153	0.743	256	380	238.287	56748	1.44603
154	0.743	180	276	164.787	39244
155	0.743	250	339	219.375	52244	1.44937
156	0.743	165	243	151.359	36046
157	0.743	277	367	241.445	57500	1.44385
158	0.743	187	271	167.223	39824
159	0.743	270	436	238.699	56846	1.53571
160	0.743	181	241	155.432	37016
161	0.743	298	447	266.068	63364	1.55293
162	0.743	180	263	171.333	40803
163	0.743	273	430	244.686	58272	1.58611
164	0.743	157	254	154.269	36739
165	0.743	356	485	316.561	75389	1.70371
166	0.743	203	296	185.808	44250
167	0.743	258	395	249.629	59449	1.57627
168	0.743	188	255	158.367	37715
169	0.743	262	410	246.265	58648	1.73039
170	0.743	157	233	142.318	33893
171	0.743	327	450	288.457	68696	1.78043
172	0.743	162	275	162.016	38584
173	0.743	268	425	265.656	63266	1.46473
174	0.743	206	281	181.369	43193
175	0.743	347	516	309.998	73826	1.78001
176	0.743	196	287	174.155	41475
177	0.743	242	456	256.44	61071	1.5889
178	0.743	179	253	161.394	38436
179	0.743	249	345	216.465	51551	1.43416
180	0.743	157	240	150.934	35945
181	0.743	273	418	246.878	58794	1.54445
182	0.743	178	260	159.849	38068
183	0.743	271	454	256.96	61195	1.5687
184	0.743	186	268	163.805	39010
185	0.743	275	469	250.351	59621	1.65637
186	0.743	169	242	151.144	35995
187	0.743	306	570	267.542	63715	1.6621
188	0.743	186	245	160.966	38334
189	0.743	236	458	240.181	57199	1.46514
190	0.743	178	262	163.931	39040
191	0.743	313	427	272.505	64897	1.47785
192	0.743	205	294	184.392	43913
193	0.743	332	435	280.403	66778	1.88309
194	0.743	146	234	148.906	35462
195	0.743	257	479	247.84	59023	1.59586
196	0.743	174	250	155.301	36985
197	0.743	334	455	291.628	69451	1.57001
198	0.743	216	303	185.749	44236
199	0.743	331	510	313.227	74595	1.5589
200	0.743	229	311	200.928	47851
201	0.743	240	365	221.642	52784	1.51656
202	0.743	161	235	146.148	34805

## Sheet: Figure 2B delta 141-664
	area	Min	Max	IntDen	RawIntDen	Raw N/C
1	0.805	400	495	368.102	36583	1.60988
2	0.805	239	330	228.651	22724
3	0.805	470	607	434.793	43211	1.79068
4	0.805	273	333	242.808	24131
5	0.805	439	589	412.375	40983	1.95157
6	0.805	214	336	211.304	21000
7	0.805	593	718	515.089	51191	1.60082
8	0.805	370	436	321.766	31978
9	0.805	376	488	351.207	34904	1.56801
10	0.805	239	318	223.982	22260
11	0.805	456	601	433.284	43061	1.8588
12	0.805	241	346	233.099	23166
13	0.805	582	753	536.632	53332	1.68623
14	0.805	350	486	318.244	31628
15	0.805	505	560	430.094	42744	1.89762
16	0.805	263	312	226.649	22525
17	0.805	614	712	537.708	53439	1.7695
18	0.805	356	392	303.875	30200
19	0.805	586	663	506.858	50373	1.75656
20	0.805	319	400	288.551	28677
21	0.805	516	609	460.824	45798	1.65097
22	0.805	289	385	279.123	27740
23	0.805	591	723	530.403	52713	1.74166
24	0.805	310	412	304.539	30266
25	0.805	438	523	393.851	39142	1.62462
26	0.805	260	337	242.426	24093
27	0.805	651	702	546.181	54281	1.55667
28	0.805	394	460	350.865	34870
29	0.805	651	732	558.155	55471	1.55901
30	0.805	410	464	358.019	35581
31	0.805	543	627	470.162	46726	1.46849
32	0.805	365	424	320.166	31819
33	0.805	427	493	366.23	36397	1.82881
34	0.805	226	274	200.256	19902
35	0.805	443	559	402.444	39996	1.80757
36	0.805	231	318	222.644	22127
37	0.805	471	567	413.15	41060	1.43316
38	0.805	329	404	288.279	28650
39	0.805	408	523	378.687	37635	1.70194
40	0.805	236	346	222.503	22113
41	0.805	666	814	596.089	59241	1.95922
42	0.805	340	429	304.248	30237
43	0.805	497	656	471.369	46846	1.57981
44	0.805	330	420	298.371	29653
45	0.805	454	527	391.486	38907	1.81342
46	0.805	208	321	215.882	21455
47	0.805	398	538	385.338	38296	1.53104
48	0.805	282	341	251.683	25013
49	0.805	453	592	418.714	41613	1.42111
50	0.805	321	428	294.638	29282
51	0.805	479	572	427.528	42489	1.96399
52	0.805	228	316	217.683	21634
53	0.805	430	576	402.675	40019	1.67276
54	0.805	257	346	240.726	23924
55	0.805	485	583	423.675	42106	1.47409
56	0.805	302	400	287.414	28564
57	0.805	479	595	427.518	42488	1.64887
58	0.805	268	389	259.28	25768
59	0.805	623	764	539.801	53647	1.8529
60	0.805	307	402	291.328	28953
61	0.805	636	757	553.677	55026	1.77314
62	0.805	336	451	312.257	31033
63	0.805	655	877	617.913	61410	2.03075
64	0.805	328	428	304.278	30240
65	0.805	499	733	498.788	49571	1.46647
66	0.805	369	461	340.129	33803
67	0.805	495	626	451.567	44878	1.62743
68	0.805	302	391	277.472	27576
69	0.805	475	633	446.757	44400	1.89776
70	0.805	254	340	235.413	23396
71	0.805	570	809	534.126	53083	1.86472
72	0.805	311	416	286.438	28467
73	0.805	644	941	645.604	64162	1.92182
74	0.805	359	474	335.933	33386
75	0.805	645	800	578.621	57505	1.82875
76	0.805	341	479	316.403	31445
77	0.805	465	584	421.994	41939	1.57571
78	0.805	285	401	267.813	26616
79	0.805	470	623	426.925	42429	1.79632
80	0.805	248	347	237.667	23620
81	0.805	481	601	439.029	43632	1.89581
82	0.805	252	317	231.579	23015
83	0.805	472	567	418.13	41555	1.68327
84	0.805	273	355	248.403	24687
85	0.805	627	729	537.457	53414	1.84269
86	0.805	326	415	291.67	28987
87	0.805	466	596	433.717	43104	1.60321
88	0.805	308	379	270.53	26886
89	0.805	429	592	422.658	42005	1.58104
90	0.805	299	357	267.33	26568
91	0.805	440	548	394.484	39205	1.62602
92	0.805	259	350	242.607	24111
93	0.805	472	596	423.373	42076	1.74105
94	0.805	268	338	243.171	24167
95	0.805	502	650	454.646	45184	1.87946
96	0.805	270	354	241.903	24041
97	0.805	502	656	474.378	47145	1.89459
98	0.805	269	354	250.385	24884
99	0.805	504	635	453.368	45057	1.86286
100	0.805	261	346	243.372	24187
101	0.743	220	337	217.456	51787	1.36031
102	0.743	130	278	159.857	38070
103	0.743	277	406	255.524	60853	1.47415
104	0.743	192	271	173.336	41280
105	0.743	259	370	234.159	55765	1.31994
106	0.743	194	296	177.401	42248
107	0.743	285	427	256.679	61128	1.37648
108	0.743	215	291	186.475	44409
109	0.743	304	403	257.313	61279	1.49264
110	0.743	201	272	172.387	41054
111	0.743	282	445	267.265	63649	1.63031
112	0.743	158	261	163.935	39041
113	0.743	338	474	299.131	71238	1.57781
114	0.743	193	305	189.587	45150
115	0.743	326	499	305.228	72690	1.65025
116	0.743	182	310	184.959	44048
117	0.743	294	446	281.117	66948	1.54404
118	0.743	193	303	182.066	43359
119	0.743	279	421	258.417	61542	1.49171
120	0.743	205	269	173.236	41256
121	0.743	279	468	279.152	66480	1.54907
122	0.743	206	278	180.206	42916
123	0.743	275	396	254.21	60540	1.55898
124	0.743	181	249	163.061	38833
125	0.743	304	391	254.206	60539	1.5202
126	0.743	183	264	167.218	39823
127	0.743	269	370	227.752	54239	1.7649
128	0.743	142	213	129.045	30732
129	0.743	323	466	291.888	69513	1.60383
130	0.743	191	302	181.995	43342
131	0.743	350	477	301.21	71733	1.64258
132	0.743	211	296	183.376	43671
133	0.743	291	422	269.574	64199	1.75015
134	0.743	169	249	154.029	36682
135	0.743	360	506	331.892	79040	1.70779
136	0.743	211	347	194.34	46282
137	0.743	319	485	289.175	68867	1.47224
138	0.743	203	311	196.418	46777
139	0.743	285	432	267.596	63728	1.5474
140	0.743	178	268	172.933	41184
141	0.743	319	470	285.375	67962	1.48564
142	0.743	191	311	192.089	45746
143	0.743	320	464	274.134	65285	1.4759
144	0.743	221	281	185.74	44234
145	0.743	269	379	241.264	57457	1.42584
146	0.743	173	269	169.209	40297
147	0.743	250	352	227.307	54133	1.55162
148	0.743	154	232	146.496	34888
149	0.743	222	327	207.58	49435	1.37156
150	0.743	148	247	151.346	36043
151	0.743	204	326	200.765	47812	1.38121
152	0.743	160	229	145.354	34616
153	0.743	294	386	253.412	60350	1.69503
154	0.743	159	246	149.503	35604
155	0.743	362	508	311.481	74179	1.75934
156	0.743	172	297	177.044	42163
157	0.743	273	393	241.436	57498	1.57103
158	0.743	169	240	153.681	36599
159	0.743	249	375	229.062	54551	1.41559
160	0.743	182	259	161.814	38536
161	0.743	284	441	270.641	64453	1.4937
162	0.743	201	286	181.189	43150
163	0.743	281	362	237.04	56451	1.46847
164	0.743	185	254	161.419	38442
165	0.743	282	378	244.72	58280	1.58133
166	0.743	176	249	154.756	36855
167	0.743	225	401	236.557	56336	1.47303
168	0.743	166	252	160.592	38245
169	0.743	282	436	273.958	65243	1.53261
170	0.743	183	293	178.753	42570
171	0.743	288	419	272.094	64799	1.50794
172	0.743	181	305	180.441	42972
173	0.743	377	478	318.619	75879	1.69889
174	0.743	214	297	187.546	44664
175	0.743	326	482	312.967	74533	1.79541
176	0.743	188	295	174.315	41513
177	0.743	333	446	284.964	67864	1.69368
178	0.743	184	256	168.251	40069
179	0.743	282	404	251.615	59922	1.41723
180	0.743	208	301	177.54	42281
181	0.743	345	472	309.125	73618	1.82079
182	0.743	186	267	169.776	40432
183	0.743	289	417	258.325	61520	1.49888
184	0.743	192	292	172.345	41044
185	0.743	290	399	251.224	59829	1.58161
186	0.743	173	256	158.841	37828
187	0.743	332	489	311.821	74260	1.64696
188	0.743	216	309	189.331	45089
189	0.743	302	406	267.126	63616	1.55693
190	0.743	204	262	171.573	40860
191	0.743	280	446	284.019	67639	1.6059
192	0.743	158	290	176.859	42119
193	0.743	273	430	274.29	65322	1.4431
194	0.743	217	293	190.07	45265
195	0.743	294	396	254.055	60503	1.51118
196	0.743	196	266	168.117	40037
197	0.743	291	444	264.342	62953	1.53739
198	0.743	188	268	171.942	40948
199	0.743	232	334	219.61	52300	1.63852
200	0.743	142	225	134.029	31919
201	0.743	258	381	246.236	58641	1.50497
202	0.743	182	263	163.616	38965
203	0.743	289	371	246.853	58788	1.58968
204	0.743	162	251	155.285	36981

## Sheet: Figure 2B 1-140
	area	mean	min	max	Int Den	Raw Int Den	N/C
1	2.061	338.413	311	358	697.407	27073	1.21758
2	2.061	277.938	254	293	572.779	22235
3	2.061	325.025	306	340	669.818	26002	1.18671
4	2.061	273.887	246	299	564.433	21911
5	2.061	285.712	265	308	588.802	22857	1.1875
6	2.061	240.6	212	270	495.833	19248
7	2.061	282	261	302	581.151	22560	1.19025
8	2.061	236.925	212	266	488.26	18954
9	2.061	287.188	270	304	591.842	22975	1.25355
10	2.061	229.1	205	247	472.134	18328
11	2.061	277.725	254	296	572.341	22218	1.27018
12	2.061	218.65	196	241	450.598	17492
13	2.061	320.938	294	338	661.394	25675	1.25722
14	2.061	255.275	237	275	526.076	20422
15	2.061	270.125	256	287	556.679	21610	1.14612
16	2.061	235.688	215	255	485.71	18855
17	2.061	269.413	242	295	555.211	21553	1.2082
18	2.061	222.988	198	242	459.537	17839
19	2.061	271.9	253	295	560.337	21752	1.33366
20	2.061	203.875	176	220	420.15	16310
21	2.061	345.325	312	375	711.653	27626	1.19006
22	2.061	290.175	265	310	597.998	23214
23	2.061	286.488	263	316	590.399	22919	1.19519
24	2.061	239.7	213	270	493.979	19176
25	2.061	282.288	256	303	581.744	22583	1.26021
26	2.061	224	202	248	461.624	17920
27	2.061	248.825	236	268	512.784	19906	1.21928
28	2.061	204.075	184	226	420.562	16326
29	2.061	303.75	274	323	625.974	24300	1.28307
30	2.061	236.738	206	267	487.873	18939
31	2.061	305.938	280	332	630.482	24475	1.20306
32	2.061	254.3	225	281	524.067	20344
33	2.061	699.9	658	751	1442.37	55992	1.36963
34	2.061	511.012	463	542	1053.11	40881
35	2.061	764.663	684	813	1575.83	61173	1.1636
36	2.061	657.15	603	702	1354.27	52572
37	2.061	660.538	577	717	1361.25	52843	1.33987
38	2.061	492.988	412	565	1015.96	39439
39	2.061	675.837	626	712	1392.78	54067	1.11315
40	2.061	607.138	548	644	1251.2	48571
41	2.061	779.85	733	814	1607.13	62388	1.48904
42	2.061	523.725	477	566	1079.3	41898
43	2.061	722.55	654	777	1489.05	57804	1.24672
44	2.061	579.562	493	658	1194.37	46365
45	2.061	951.825	910	989	1961.54	76146	1.48494
46	2.061	640.987	534	720	1320.96	51279
47	2.061	691.475	632	750	1425.01	55318	1.26534
48	2.061	546.475	437	624	1126.19	43718
49	2.061	593.275	550	627	1222.63	47462	1.41741
50	2.061	418.562	358	482	862.582	33485
51	2.061	695.538	645	729	1433.38	55643	1.28275
52	2.061	542.225	491	599	1117.43	43378
53	2.061	735.562	683	776	1515.86	58845	1.10046
54	2.061	668.413	625	702	1377.48	53473
55	2.061	673.062	616	720	1387.06	53845	1.33003
56	2.061	506.05	412	586	1042.88	40484
57	2.061	666.8	613	707	1374.15	53344	1.24502
58	2.061	535.575	474	585	1103.72	42846
59	2.061	789.112	716	832	1626.22	63129	1.34753
60	2.061	585.6	513	636	1206.82	46848
61	2.061	899.625	841	947	1853.96	71970	1.81307
62	2.061	496.188	389	567	1022.55	39695
63	2.061	865.263	823	919	1783.15	69221	1.32094
64	2.061	655.038	564	726	1349.91	52403
65	2.061	738.587	692	790	1522.1	59087	1.2308
66	2.061	600.087	533	653	1236.67	48007
67	2.061	843.188	774	889	1737.66	67455	1.52148
68	2.061	554.188	512	586	1142.08	44335
69	2.061	975.638	910	1037	2010.61	78051	1.30213
70	2.061	749.263	673	807	1544.1	59941
71	2.061	913.125	865	962	1881.79	73050	1.17182
72	2.061	779.237	709	836	1605.87	62339
73	2.061	578.775	505	623	1192.75	46302	1.3474
74	2.061	429.55	367	473	885.225	34364
75	2.061	925.663	878	957	1907.62	74053	1.32252
76	2.061	699.925	615	785	1442.42	55994
77	2.061	882.663	777	1012	1819.01	70613	1.67333
78	2.061	527.487	454	588	1087.06	42199
79	2.061	762.987	735	799	1572.38	61039	1.23117
80	2.061	619.725	559	672	1277.14	49578
81	2.061	695.087	645	735	1432.45	55607	1.12683
82	2.061	616.85	564	666	1271.22	49348
83	2.061	581.712	532	620	1198.81	46537	1.41553
84	2.061	410.95	357	451	846.894	32876
85	2.061	533.85	493	563	1100.17	42708	1.29234
86	2.061	413.087	359	456	851.299	33047
87	2.061	504.312	468	540	1039.3	40345	1.23511
88	2.061	408.312	362	449	841.459	32665
89	2.061	740.825	692	790	1526.71	59266	1.27465
90	2.061	581.2	536	619	1197.75	46496
91	2.061	589.212	532	650	1214.26	47137	1.47299
92	2.061	400.012	318	469	824.354	32001
93	2.061	702.362	652	760	1447.44	56189	1.34019
94	2.061	524.075	442	595	1080.02	41926
95	2.061	841.825	803	897	1734.85	67346	1.46822
96	2.061	573.362	529	618	1181.6	45869
97	2.061	752.2	686	803	1550.15	60176	1.43646
98	2.061	523.65	433	597	1079.15	41892
99	2.061	611.1	562	655	1259.37	48888	1.27658
100	2.061	478.7	421	529	986.515	38296
101	2.061	891.9	850	929	1838.05	71352	1.47385
102	2.061	605.15	518	685	1247.11	48412
103	2.061	926.987	827	999	1910.35	74159	1.3419
104	2.061	690.8	585	786	1423.61	55264
105	2.061	790.263	730	849	1628.59	63221	1.17623
106	2.061	671.862	627	711	1384.59	53749
107	2.061	796.2	730	862	1640.83	63696	1.28417
108	2.061	620.013	544	690	1277.73	49601
109	2.061	790.587	717	846	1629.26	63247	1.2865
110	2.061	614.525	550	658	1266.42	49162
111	2.061	770.062	722	807	1586.96	61605	1.36219
112	2.061	565.312	484	617	1165.01	45225
113	2.061	954.325	918	988	1966.69	76346	1.34777
114	2.061	708.075	630	776	1459.21	56646
115	0.743	218.254	183	258	162.213	38631	1.20775
116	0.743	180.712	132	211	134.31	31986
117	0.743	234.181	186	277	174.05	41450	1.19024
118	0.743	196.751	169	237	146.232	34825
119	0.743	248.35	192	310	184.581	43958	1.22446
120	0.743	202.825	163	248	150.746	35900
121	0.743	239.774	196	293	178.207	42440	1.11731
122	0.743	214.599	155	256	159.496	37984
123	0.743	203.068	166	258	150.926	35943	1.0518
124	0.743	193.068	152	230	143.494	34173
125	0.743	236.684	197	273	175.91	41893	1.05166
126	0.743	225.056	188	267	167.269	39835
127	0.743	201.785	172	238	149.973	35716	1.15194
128	0.743	175.169	152	209	130.191	31005
129	0.743	243.209	199	283	180.76	43048	1.23061
130	0.743	197.633	167	238	146.887	34981
131	0.743	235.983	189	290	175.39	41769	1.19391
132	0.743	197.655	147	227	146.903	34985
133	0.743	249.446	206	295	185.396	44152	1.25482
134	0.743	198.791	169	227	147.747	35186
135	0.743	213.734	182	250	158.854	37831	1.12814
136	0.743	189.458	156	225	140.811	33534
137	0.743	229.237	189	271	170.376	40575	1.26694
138	0.743	180.938	132	217	134.478	32026
139	0.743	289.768	254	333	215.365	51289	1.27935
140	0.743	226.497	193	267	168.34	40090
141	0.743	290.503	239	360	215.91	51419	1.27994
142	0.743	226.966	195	259	168.688	40173
143	0.743	315.802	281	379	234.714	55897	1.35017
144	0.743	233.898	182	293	173.84	41400
145	0.743	258	213	291	191.753	45666	1.13481
146	0.743	227.35	183	263	168.974	40241
147	0.743	241.955	206	288	179.828	42826	1.17367
148	0.743	206.153	171	246	153.219	36489
149	0.743	255.582	196	333	189.956	45238	1.24719
150	0.743	204.927	164	251	152.308	36272
151	0.743	256.345	215	300	190.523	45373	1.21843
152	0.743	210.39	173	240	156.368	37239
153	0.743	248.876	215	311	184.972	44051	1.17673
154	0.743	211.497	163	242	157.191	37435
155	0.743	220.814	173	261	164.115	39084	1.27834
156	0.743	172.734	141	212	128.381	30574
157	0.743	252.791	200	315	187.882	44744	1.27807
158	0.743	197.791	164	246	147.004	35009
159	0.743	227.062	194	269	168.759	40190	1.21229
160	0.743	187.299	140	216	139.207	33152
161	0.743	205.04	178	249	152.392	36292	1.29167
162	0.743	158.74	128	193	117.98	28097
163	0.743	202.226	164	242	150.3	35794	1.10227
164	0.743	183.463	148	221	136.355	32473
165	0.743	262.418	222	306	195.037	46448	1.20126
166	0.743	218.452	178	261	162.36	38666
167	0.743	252.068	191	313	187.344	44616	1.17503
168	0.743	214.52	182	263	159.438	37970
169	0.743	258.825	206	306	192.366	45812	1.23466
170	0.743	209.633	157	263	155.805	37105
171	0.743	258.339	213	298	192.005	45726	1.24699
172	0.743	207.169	173	261	153.975	36669
173	0.743	282.915	220	334	210.271	50076	1.23404
174	0.743	229.26	190	274	170.393	40579
175	0.743	299.808	248	352	222.826	53066	1.1937
176	0.743	251.158	188	302	186.668	44455
177	0.743	274.751	225	317	204.204	48631	1.2718
178	0.743	216.034	182	257	160.563	38238
179	0.743	229.61	197	268	170.653	40641	1.1626
180	0.743	197.497	168	224	146.786	34957
181	0.743	231.655	182	286	172.173	41003	1.20512
182	0.743	192.226	166	230	142.868	34024
183	0.743	255.847	213	294	190.154	45285	1.19002
184	0.743	214.994	177	245	159.79	38054
185	0.743	227.175	174	282	168.843	40210	1.15238
186	0.743	197.136	173	233	146.517	34893
187	0.743	273.78	228	314	203.481	48459	1.189
188	0.743	230.26	204	270	171.136	40756
189	0.743	219.531	180	273	163.162	38857	1.13853
190	0.743	192.819	166	232	143.309	34129
191	0.743	223.667	173	261	166.236	39589	1.17377
192	0.743	190.554	153	225	141.625	33728
193	0.743	276.864	226	320	205.774	49005	1.15447
194	0.743	239.819	214	281	178.241	42448
195	0.743	239.814	204	298	178.237	42447	1.13062
196	0.743	212.107	178	257	157.645	37543
197	0.743	225.107	192	271	167.307	39844	1.21022
198	0.743	186.006	151	218	138.245	32923
199	0.743	261.198	223	305	194.13	46232	1.24153
200	0.743	210.384	169	257	156.364	37238
201	0.743	256.582	218	298	190.699	45415	1.25591
202	0.743	204.299	174	232	151.841	36161
203	0.743	204.949	156	238	152.324	36276	1.06968
204	0.743	191.599	166	225	142.402	33913
205	0.743	293.367	255	333	218.039	51926	1.39234
206	0.743	210.701	152	247	156.599	37294
207	0.743	209.96	172	246	156.049	37163	1.1512
208	0.743	182.384	159	222	135.553	32282
209	0.743	244.576	195	301	181.776	43290	1.25446
210	0.743	194.966	151	236	144.905	34509
211	0.743	215.424	184	251	160.109	38130	1.20163
212	0.743	179.277	152	209	133.244	31732
213	0.743	242.972	212	294	180.584	43006	1.14897
214	0.743	211.469	176	261	157.17	37430
215	0.743	278.124	236	334	206.71	49228	1.29537
216	0.743	214.706	163	267	159.576	38003
217	0.743	246.605	214	293	183.284	43649	1.20581
218	0.743	204.514	172	242	152.001	36199
219	0.743	236.119	209	270	175.49	41793	1.27612
220	0.743	185.028	156	221	137.519	32750
221	0.743	250.847	216	293	186.437	44400	1.23234
222	0.743	203.554	176	242	151.287	36029

## Sheet: Figure 2B 141-664
	area	mean	min	max	Int Den	Raw Int Den	Raw N/C
1	2.061	350.262	321	380	721.828	28021	1.20999
2	2.061	289.475	267	319	596.556	23158
3	2.061	338.325	308	361	697.227	27066	1.19534
4	2.061	283.038	262	305	583.289	22643
5	2.061	332.575	311	355	685.377	26606	1.29457
6	2.061	256.9	226	290	529.425	20552
7	2.061	291.988	279	307	601.734	23359	1.26272
8	2.061	231.238	209	255	476.539	18499
9	2.061	317.712	293	342	654.748	25417	1.25121
10	2.061	253.925	225	284	523.294	20314
11	2.061	333.913	309	356	688.134	26713	1.33705
12	2.061	249.738	214	278	514.664	19979
13	2.061	365.538	339	385	753.307	29243	1.30276
14	2.061	280.587	261	300	578.24	22447
15	2.061	328.75	311	349	677.495	26300	1.2603
16	2.061	260.85	234	287	537.565	20868
17	2.061	323.288	297	344	666.237	25863	1.29997
18	2.061	248.688	212	280	512.5	19895
19	2.061	357.7	334	379	737.155	28616	1.2359
20	2.061	289.425	262	309	596.453	23154
21	2.061	360.6	342	381	743.132	28848	1.28219
22	2.061	281.238	259	301	579.58	22499
23	2.061	297.387	281	322	612.862	23791	1.17266
24	2.061	253.6	230	268	522.624	20288
25	2.061	359.1	341	381	740.04	28728	1.25945
26	2.061	285.125	263	317	587.591	22810
27	2.061	426.062	380	457	878.038	34085	1.39316
28	2.061	305.825	258	349	630.25	24466
29	2.061	383.6	359	411	790.531	30688	1.28779
30	2.061	297.875	262	321	613.867	23830
31	2.061	407.613	384	432	840.016	32609	1.46216
32	2.061	278.775	235	310	574.505	22302
33	2.061	400.025	381	423	824.38	32002	1.28631
34	2.061	310.988	288	334	640.889	24879
35	2.061	313.587	291	333	646.247	25087	1.28139
36	2.061	244.725	207	271	504.334	19578
37	2.061	343.238	321	368	707.351	27459	1.39457
38	2.061	246.125	222	266	507.219	19690
39	2.061	341.637	328	363	704.053	27331	1.15521
40	2.061	295.738	275	320	609.462	23659
41	2.061	328.125	305	350	676.207	26250	1.10905
42	2.061	295.863	269	312	609.719	23669
43	2.061	374.587	349	404	771.957	29967	1.20524
44	2.061	310.8	283	336	640.503	24864
45	2.061	332.212	311	352	684.63	26577	1.15267
46	2.061	288.212	274	310	593.954	23057
47	2.061	383.075	346	431	789.449	30646	1.36849
48	2.061	279.925	255	303	576.875	22394
49	2.061	348.7	327	377	718.608	27896	1.2542
50	2.061	278.025	248	306	572.959	22242
51	2.061	333.35	303	359	686.974	26668	1.16617
52	2.061	285.85	262	311	589.085	22868
53	2.061	374.113	355	393	770.979	29929	1.4069
54	2.061	265.913	242	289	547.998	21273
55	2.061	371.325	342	405	765.234	29706	1.12026
56	2.061	331.462	302	358	683.085	26517
57	2.061	263.95	250	284	543.953	21116	1.13956
58	2.061	231.625	213	247	477.337	18530
59	2.061	304.5	281	320	627.52	24360	1.25989
60	2.061	241.688	198	270	498.074	19335
61	2.061	355.7	336	387	733.034	28456	1.33816
62	2.061	265.812	242	287	547.792	21265
63	2.061	324.65	302	351	669.045	25972	1.30303
64	2.061	249.15	219	282	513.453	19932
65	2.061	362.725	332	386	747.511	29018	1.28506
66	2.061	282.262	254	315	581.692	22581
67	2.061	358.337	333	383	738.469	28667	1.24748
68	2.061	287.25	262	313	591.971	22980
69	2.061	351	326	374	723.348	28080	1.36949
70	2.061	256.3	234	278	528.188	20504
71	2.061	309.163	290	327	637.128	24733	1.2606
72	2.061	245.25	229	263	505.416	19620
73	2.061	317.8	294	347	654.929	25424	1.18108
74	2.061	269.075	246	288	554.515	21526
75	2.061	388.038	360	414	799.675	31043	1.26386
76	2.061	307.025	277	329	632.723	24562
77	2.061	380.988	356	404	785.147	30479	1.37783
78	2.061	276.512	241	304	569.842	22121
79	2.061	343.9	329	364	708.716	27512	1.41239
80	2.061	243.488	215	269	501.784	19479
81	2.061	347.663	322	374	716.47	27813	1.28348
82	2.061	270.875	248	295	558.225	21670
83	2.061	299.887	283	332	618.014	23991	1.21369
84	2.061	247.088	217	269	509.203	19767
85	2.061	276.163	253	301	569.121	22093	1.2145
86	2.061	227.387	201	244	468.605	18191
87	2.061	106.013	100	111	218.473	8481	1.03427
88	2.061	102.5	98	108	211.234	8200
89	2.061	106.225	102	110	218.911	8498	1.03294
90	2.061	102.838	98	108	211.93	8227
91	2.061	312.275	298	337	643.543	24982	1.54115
92	2.061	202.625	186	218	417.574	16210
93	2.061	314.113	287	341	647.329	25129	1.38444
94	2.061	226.887	195	263	467.574	18151
95	2.061	260.938	241	277	537.745	20875	1.2518
96	2.061	208.45	185	230	429.578	16676
97	2.061	340.212	313	360	701.117	27217	1.2751
98	2.061	266.812	245	288	549.853	21345
99	2.061	341.637	317	364	704.053	27331	1.34397
100	2.061	254.2	234	282	523.86	20336
101	2.061	321.975	299	341	663.533	25758	1.24015
102	2.061	259.625	232	282	535.04	20770
103	2.061	329.575	302	353	679.195	26366	1.30048
104	2.061	253.425	230	267	522.263	20274
105	2.061	282.038	257	309	581.229	22563	1.26403
106	2.061	223.125	207	242	459.82	17850
107	2.061	267.962	245	290	552.222	21437	1.172
108	2.061	228.637	206	244	471.181	18291
109	2.061	266.5	240	288	549.209	21320	1.18431
110	2.061	225.025	208	243	463.736	18002
111	2.061	284.087	268	302	585.453	22727	1.21632
112	2.061	233.562	211	249	481.33	18685
113	2.061	355.312	338	376	732.235	28425	1.3654
114	2.061	260.225	241	279	536.277	20818
115	2.061	347.113	327	365	715.336	27769	1.28299
116	2.061	270.55	253	286	557.555	21644
117	2.061	327.875	309	351	675.691	26230	1.36643
118	2.061	239.95	203	267	494.494	19196
119	2.061	330.712	310	355	681.539	26457	1.38424
120	2.061	238.912	208	266	492.356	19113
121	2.061	278.975	255	309	574.917	22318	1.24709
122	2.061	223.7	201	252	461.005	17896
123	2.061	342.462	304	380	705.754	27397	1.24651
124	2.061	274.738	247	296	566.185	21979
125	2.061	301.375	276	326	621.08	24110	1.2194
126	2.061	247.15	226	274	509.332	19772
127	2.061	325.587	296	355	670.977	26047	1.19762
128	2.061	271.863	250	296	560.26	21749
129	2.061	372.113	352	395	766.857	29769	1.28971
130	2.061	288.525	251	314	594.598	23082
131	2.061	383.062	356	411	789.423	30645	1.23713
132	2.061	309.637	277	338	638.107	24771
133	2.061	352.25	329	373	725.924	28180	1.34524
134	2.061	261.85	225	291	539.626	20948
135	2.061	323.488	299	349	666.65	25879	1.18299
136	2.061	273.45	237	309	563.531	21876
137	2.061	336.5	316	355	693.466	26920	1.32846
138	2.061	253.3	239	271	522.006	20264
139	2.061	361.038	340	382	744.033	28883	1.46125
140	2.061	247.075	225	268	509.177	19766
141	2.061	318.35	302	341	656.062	25468	1.34474
142	2.061	236.738	209	266	487.873	18939
143	2.061	357.538	319	381	736.82	28603	1.27663
144	2.061	280.062	250	321	577.158	22405
145	2.061	375.05	337	411	772.911	30004	1.40402
146	2.061	267.125	236	286	550.497	21370
147	2.061	404.775	380	431	834.168	32382	1.29239
148	2.061	313.2	286	339	645.449	25056
149	2.061	326.925	307	350	673.734	26154	1.24567
150	2.061	262.45	242	291	540.862	20996
151	2.061	372.413	351	395	767.475	29793	1.44109
152	2.061	258.425	239	285	532.567	20674
153	2.061	325.55	300	345	670.9	26044	1.30298
154	2.061	249.85	225	270	514.896	19988
155	2.061	294.262	263	325	606.422	23541	1.23978
156	2.061	237.35	222	251	489.136	18988
157	2.061	353.15	325	382	727.779	28252	1.30494
158	2.061	270.625	236	299	557.709	21650
159	2.061	351.925	323	376	725.254	28154	1.37009
160	2.061	256.863	229	282	529.347	20549
161	2.061	334.413	306	359	689.164	26753	1.30668
162	2.061	255.925	229	276	527.415	20474
163	2.061	299.375	271	338	616.958	23950	1.23396
164	2.061	242.613	217	266	499.981	19409
165	2.061	328.325	305	349	676.619	26266	1.47173
166	2.061	223.088	199	247	459.743	17847
167	2.061	311.337	293	335	641.611	24907	1.28043
168	2.061	243.15	221	264	501.088	19452
169	0.743	258.023	207	312	191.77	45670	1.23416
170	0.743	209.068	166	246	155.385	37005
171	0.743	254.186	209	304	188.919	44991	1.30891
172	0.743	194.198	167	226	144.334	34373
173	0.743	271.22	232	323	201.579	48006	1.27648
174	0.743	212.475	157	249	157.917	37608
175	0.743	254.339	217	291	189.032	45018	1.21101
176	0.743	210.023	157	253	156.095	37174
177	0.743	268.672	231	316	199.685	47555	1.28771
178	0.743	208.644	173	249	155.071	36930
179	0.743	256.565	212	314	190.687	45412	1.31222
180	0.743	195.52	162	235	145.316	34607
181	0.743	259.192	217	301	192.639	45877	1.25388
182	0.743	206.712	162	253	153.634	36588
183	0.743	241.379	193	302	179.4	42724	1.20079
184	0.743	201.017	176	234	149.402	35580
185	0.743	287.836	243	327	213.928	50947	1.31963
186	0.743	218.119	187	259	162.112	38607
187	0.743	303.831	234	362	225.816	53778	1.29751
188	0.743	234.164	166	286	174.038	41447
189	0.743	307.949	229	388	228.877	54507	1.29197
190	0.743	238.356	188	287	177.153	42189
191	0.743	266.898	226	334	198.367	47241	1.24525
192	0.743	214.333	180	247	159.299	37937
193	0.743	262.734	224	296	195.272	46504	1.27234
194	0.743	206.497	159	245	153.475	36550
195	0.743	246.102	214	301	182.91	43560	1.21114
196	0.743	203.198	169	243	151.023	35966
197	0.743	262.819	213	314	195.335	46519	1.3101
198	0.743	200.61	173	239	149.1	35508
199	0.743	287.175	253	324	213.437	50830	1.32101
200	0.743	217.39	183	247	161.571	38478
201	0.743	245.972	217	274	182.814	43537	1.14622
202	0.743	214.593	192	247	159.492	37983
203	0.743	273.186	237	331	203.04	48354	1.26555
204	0.743	215.864	186	247	160.437	38208
205	0.743	259.169	218	297	192.623	45873	1.25346
206	0.743	206.763	172	245	153.672	36597
207	0.743	301.424	254	345	224.027	53352	1.2175
208	0.743	247.576	207	307	184.006	43821
209	0.743	258.435	224	307	192.077	45743	1.25664
210	0.743	205.655	142	247	152.849	36401
211	0.743	295.655	243	343	219.74	52331	1.38916
212	0.743	212.831	178	239	158.182	37671
213	0.743	280.107	226	324	208.184	49579	1.34433
214	0.743	208.362	165	241	154.861	36880
215	0.743	246.22	205	285	182.998	43581	1.30326
216	0.743	188.927	132	232	140.416	33440
217	0.743	254.141	210	306	188.885	44983	1.22697
218	0.743	207.13	127	251	153.945	36662
219	0.743	234.582	203	265	174.348	41521	1.24699
220	0.743	188.119	160	221	139.815	33297
221	0.743	259.379	220	304	192.778	45910	1.31352
222	0.743	197.469	169	245	146.765	34952
223	0.743	322.847	272	376	239.95	57144	1.31263
224	0.743	245.955	188	293	182.801	43534
225	0.743	343.989	289	390	255.663	60886	1.39994
226	0.743	245.718	178	292	182.625	43492
227	0.743	310.836	270	355	231.023	55018	1.31616
228	0.743	236.169	170	285	175.528	41802
229	0.743	293.91	252	369	218.442	52022	1.27868
230	0.743	229.853	191	283	170.834	40684
231	0.743	245.949	182	301	182.797	43533	1.22366
232	0.743	200.994	147	258	149.385	35576
233	0.743	314.605	274	368	233.824	55685	1.34174
234	0.743	234.475	188	287	174.269	41502
235	0.743	270.972	224	332	201.394	47962	1.26941
236	0.743	213.463	185	253	158.652	37783
237	0.743	320.017	266	364	237.846	56643	1.19528
238	0.743	267.734	219	313	198.988	47389
239	0.743	277.729	234	335	206.416	49158	1.22794
240	0.743	226.175	189	269	168.1	40033
241	0.743	272.26	233	326	202.352	48190	1.3645
242	0.743	199.531	137	242	148.297	35317
243	0.743	266.463	218	313	198.044	47164	1.27055
244	0.743	209.723	179	245	155.873	37121
245	0.743	290.797	254	327	216.129	51471	1.29116
246	0.743	225.22	191	259	167.391	39864
247	0.743	254.718	207	311	189.314	45085	1.24027
248	0.743	205.373	175	238	152.639	36351
249	0.743	213.282	174	249	158.518	37751	1.159
250	0.743	184.023	147	219	136.771	32572
251	0.743	230.989	206	270	171.678	40885	1.22034
252	0.743	189.282	160	233	140.68	33503
253	0.743	275.096	223	328	204.46	48692	1.36614
254	0.743	201.367	164	232	149.662	35642
255	0.743	320.107	269	385	237.913	56659	1.37385
256	0.743	233	188	275	173.173	41241
257	0.743	262.887	223	305	195.386	46531	1.33227
258	0.743	197.322	158	238	146.656	34926
259	0.743	269.966	242	302	200.647	47784	1.35014
260	0.743	199.955	170	239	148.612	35392
261	0.743	227.932	182	270	169.406	40344	1.06937
262	0.743	213.147	168	263	158.417	37727
263	0.743	272.294	216	322	202.377	48196	1.42672
264	0.743	190.853	163	231	141.848	33781
265	0.743	270.718	234	314	201.205	47917	1.36051
266	0.743	198.983	140	245	147.89	35220
267	0.743	266.825	233	306	198.312	47228	1.39332
268	0.743	191.503	152	226	142.331	33896
269	0.743	241.401	209	283	179.417	42728	1.34852
270	0.743	179.011	144	228	133.047	31685
271	0.743	248.949	184	299	185.026	44064	1.29265
272	0.743	192.588	158	243	143.137	34088
273	0.743	234.989	192	277	174.651	41593	1.31528
274	0.743	178.661	142	208	132.786	31623

## Sheet: Figure 2B 665-782
	area	mean	min	max	Int Den	Raw Int Den	Raw N/C
1	2.061	1038.76	961	1104	2140.7	83101	1.39212
2	2.061	746.175	634	833	1537.73	59694
3	2.061	1264.21	1149	1348	2605.31	101137	1.54356
4	2.061	819.025	663	924	1687.86	65522
5	2.061	996.513	934	1041	2053.63	79721	1.53629
6	2.061	648.65	597	707	1336.75	51892
7	2.061	1164.05	1103	1213	2398.9	93124	1.50965
8	2.061	771.075	679	847	1589.05	61686
9	2.061	1193.83	1087	1276	2460.26	95506	1.38974
10	2.061	859.025	755	968	1770.3	68722
11	2.061	1033.72	961	1074	2130.32	82698	1.46376
12	2.061	706.212	638	807	1455.38	56497
13	2.061	1431.53	1355	1500	2950.11	114522	1.71199
14	2.061	836.175	673	990	1723.21	66894
15	2.061	1137.69	1039	1217	2344.57	91015	1.49467
16	2.061	761.163	671	841	1568.62	60893
17	2.061	1015.69	963	1067	2093.15	81255	1.47017
18	2.061	690.862	576	780	1423.74	55269
19	2.061	1394.72	1316	1466	2874.28	111578	1.48868
20	2.061	936.888	823	1048	1930.76	74951
21	2.061	956	893	1006	1970.14	76480	1.5351
22	2.061	622.763	526	715	1283.4	49821
23	2.061	999.225	932	1050	2059.22	79938	1.27209
24	2.061	785.5	699	857	1618.77	62840
25	2.061	970.925	910	1038	2000.9	77674	1.64424
26	2.061	590.5	487	717	1216.91	47240
27	2.061	902.413	871	950	1859.71	72193	1.49344
28	2.061	604.25	513	671	1245.25	48340
29	2.061	1118.61	1055	1172	2305.26	89489	1.42376
30	2.061	785.675	676	867	1619.13	62854
31	2.061	896.9	826	944	1848.35	71752	1.4128
32	2.061	634.837	593	673	1308.29	50787
33	2.061	888.837	848	929	1831.73	71107	1.4414
34	2.061	616.65	558	685	1270.81	49332
35	2.061	1326.08	1263	1386	2732.8	106086	1.52381
36	2.061	870.237	713	993	1793.4	69619
37	2.061	828.375	751	893	1707.13	66270	1.31736
38	2.061	628.812	554	699	1295.87	50305
39	2.061	987.362	919	1062	2034.78	78989	1.4407
40	2.061	685.337	586	761	1412.36	54827
41	2.061	1089.62	995	1152	2245.52	87170	1.5019
42	2.061	725.5	592	835	1495.12	58040
43	2.061	938.513	876	983	1934.11	75081	1.53345
44	2.061	612.025	508	687	1261.27	48962
45	2.061	980	914	1026	2019.6	78400	1.70776
46	2.061	573.85	481	647	1182.6	45908
47	2.061	985.987	953	1033	2031.94	78879	1.5311
48	2.061	643.975	551	696	1327.12	51518
49	2.061	1300.05	1237	1345	2679.17	104004	1.71254
50	2.061	759.138	605	872	1564.45	60731
51	2.061	1258.38	1172	1324	2593.28	100670	1.6251
52	2.061	774.337	626	874	1595.77	61947
53	2.061	1405.54	1318	1459	2896.56	112443	1.76262
54	2.061	797.413	625	894	1643.32	63793
55	2.061	1305.99	1243	1359	2691.41	104479	1.74933
56	2.061	746.562	628	861	1538.53	59725
57	2.061	1278.17	1183	1350	2634.09	102254	1.64182
58	2.061	778.513	612	901	1604.37	62281
59	2.061	1134.41	1055	1202	2337.82	90753	1.46726
60	2.061	773.15	645	872	1593.32	61852
61	2.061	1256.2	1200	1310	2588.8	100496	1.59255
62	2.061	788.8	672	890	1625.58	63104
63	2.061	1159.94	1096	1218	2390.42	92795	1.63196
64	2.061	710.763	622	770	1464.75	56861
65	2.061	933.8	894	976	1924.39	74704	1.7502
66	2.061	533.538	420	648	1099.53	42683
67	2.061	1086.61	1043	1124	2239.31	86929	1.74015
68	2.061	624.438	523	704	1286.85	49955
69	2.061	996.6	934	1045	2053.81	79728	1.51681
70	2.061	657.038	542	758	1354.04	52563
71	2.061	1039.49	967	1096	2142.2	83159	1.49413
72	2.061	695.712	610	785	1433.74	55657
73	2.061	1118.29	1024	1176	2304.59	89463	1.94502
74	2.061	574.95	478	655	1184.87	45996
75	2.061	995.663	937	1051	2051.88	79653	1.61212
76	2.061	617.612	529	687	1272.79	49409
77	2.061	772.312	735	817	1591.6	61785	1.58188
78	2.061	488.225	423	526	1006.14	39058
79	2.061	938.562	896	979	1934.21	75085	1.53979
80	2.061	609.538	477	689	1256.15	48763
81	2.061	871.1	800	919	1795.18	69688	1.46136
82	2.061	596.087	542	643	1228.43	47687
83	2.061	758.438	715	801	1563	60675	1.51434
84	2.061	500.837	434	544	1032.14	40067
85	2.061	1050.96	970	1141	2165.84	84077	1.47752
86	2.061	711.3	606	786	1465.86	56904
87	2.061	877.837	823	915	1809.07	70227	1.55023
88	2.061	566.263	483	634	1166.96	45301
89	2.061	763.487	695	802	1573.41	61079	1.42972
90	2.061	534.013	471	592	1100.5	42721
91	2.061	910	861	954	1875.35	72800	1.53736
92	2.061	591.925	532	662	1219.85	47354
93	2.061	903.913	839	953	1862.8	72313	1.32303
94	2.061	683.212	623	743	1407.98	54657
95	2.061	989.987	922	1036	2040.19	79199	1.51259
96	2.061	654.5	554	743	1348.81	52360
97	2.061	1361.64	1306	1411	2806.09	108931	1.55736
98	2.061	874.325	736	986	1801.83	69946
99	2.061	1545.14	1458	1634	3184.25	123611	1.48794
100	2.061	1038.44	916	1115	2140.03	83075
101	2.061	1329.45	1288	1392	2739.76	106356	1.68942
102	2.061	786.925	641	864	1621.71	62954
103	2.061	1174.5	1108	1237	2420.43	93960	1.62794
104	2.061	721.462	627	800	1486.8	57717
105	2.061	1274.03	1219	1328	2625.54	101922	1.82938
106	2.061	696.425	557	842	1435.21	55714
107	2.061	1435.06	1362	1494	2957.41	114805	1.62464
108	2.061	883.312	726	1004	1820.35	70665
109	2.061	1528.51	1469	1587	3149.99	122281	1.77401
110	2.061	861.612	774	973	1775.63	68929
111	2.061	1483.22	1388	1553	3056.66	118658	1.56438
112	2.061	948.125	832	1039	1953.91	75850
113	2.061	1369.86	1283	1419	2823.04	109589	1.79813
114	2.061	761.825	656	858	1569.98	60946
115	2.061	1617.2	1515	1688	3332.76	129376	1.62655
116	2.061	994.25	892	1056	2048.97	79540
117	2.061	1572.41	1492	1632	3240.46	125793	1.49256
118	2.061	1053.5	952	1120	2171.07	84280
119	2.061	1580.56	1494	1648	3257.26	126445	1.68638
120	2.061	937.25	812	1053	1931.5	74980
121	2.061	1385.04	1281	1497	2854.31	110803	1.38658
122	2.061	998.888	879	1111	2058.53	79911
123	2.061	1062.41	997	1116	2189.44	84993	1.61133
124	2.061	659.337	561	760	1358.78	52747
125	2.061	1136.9	1047	1216	2342.95	90952	1.62316
126	2.061	700.425	589	781	1443.45	56034
127	2.061	1004.44	939	1055	2069.97	80355	1.78068
128	2.061	564.075	432	641	1162.46	45126
129	2.061	1377.21	1295	1450	2838.19	110177	1.44265
130	2.061	954.638	866	1037	1967.34	76371
131	2.061	1328.66	1237	1380	2738.13	106293	1.47224
132	2.061	902.475	817	960	1859.84	72198
133	2.061	1427.88	1348	1496	2942.59	114230	1.68979
134	2.061	845	690	931	1741.39	67600
135	2.061	1347.53	1232	1540	2777.01	107802	1.44635
136	2.061	931.675	806	1022	1920.01	74534
137	2.061	1304.12	1232	1378	2687.57	104330	1.60609
138	2.061	811.987	694	897	1673.36	64959
139	2.061	1419.6	1348	1507	2925.54	113568	1.97023
140	2.061	720.525	607	829	1484.87	57642
141	2.061	1222.74	1137	1302	2519.84	97819	1.76904
142	2.061	691.188	554	813	1424.41	55295
143	2.061	1601.17	1518	1679	3299.73	128094	2.07732
144	2.061	770.788	646	884	1588.45	61663
145	2.061	1153.04	1077	1204	2376.2	92243	1.64212
146	2.061	702.163	621	758	1447.03	56173
147	2.061	1615.25	1567	1658	3328.74	129220	1.5678
148	2.061	1030.26	900	1139	2123.19	82421
149	2.061	1375.81	1282	1446	2835.3	110065	1.5609
150	2.061	881.425	784	970	1816.46	70514
151	2.061	1568.41	1438	1671	3232.22	125473	1.79368
152	2.061	874.413	747	955	1802.01	69953
153	2.061	1859.14	1761	1944	3831.35	148731	1.72542
154	2.061	1077.5	1010	1131	2220.53	86200
155	2.061	1739.2	1678	1798	3584.18	139136	1.74373
156	2.061	997.4	739	1208	2055.46	79792
157	2.061	1530.06	1429	1610	3153.18	122405	1.75922
158	2.061	869.737	781	935	1792.37	69579
159	0.743	419.757	357	481	311.976	74297	1.36295
160	0.743	307.977	228	416	228.898	54512
161	0.743	499.701	421	553	371.392	88447	1.53509
162	0.743	325.52	247	370	241.936	57617
163	0.743	439.695	370	502	326.794	77826	1.68622
164	0.743	260.757	180	307	193.802	46154
165	0.743	510.972	439	606	379.77	90442	1.74007
166	0.743	293.65	243	345	218.249	51976
167	0.743	491.475	416	612	365.279	86991	1.37655
168	0.743	357.034	297	407	265.358	63195
169	0.743	516.938	441	586	384.204	91498	1.37146
170	0.743	376.927	329	437	280.143	66716
171	0.743	475.045	440	511	353.068	84083	1.50121
172	0.743	316.441	283	365	235.188	56010
173	0.743	404.576	360	448	300.693	71610	1.48476
174	0.743	272.486	231	315	202.52	48230
175	0.743	440.243	398	476	327.202	77923	1.55392
176	0.743	283.311	249	316	210.565	50146
177	0.743	402.588	364	437	299.215	71258	1.56223
178	0.743	257.701	227	283	191.531	45613
179	0.743	418.028	378	454	310.691	73991	1.41137
180	0.743	296.186	239	337	220.135	52425
181	0.743	530.621	456	607	394.374	93920	1.6546
182	0.743	320.695	256	371	238.35	56763
183	0.743	442.48	367	508	328.865	78319	1.48034
184	0.743	298.904	169	400	222.154	52906
185	0.743	455.718	399	526	338.703	80662	1.57242
186	0.743	289.819	205	343	215.402	51298
187	0.743	479.181	381	556	356.142	84815	1.74219
188	0.743	275.045	187	338	204.422	48683
189	0.743	478.26	422	554	355.457	84652	1.49962
190	0.743	318.921	245	370	237.032	56449
191	0.743	471.802	384	568	350.658	83509	1.51137
192	0.743	312.169	207	383	232.014	55254
193	0.743	511.785	439	578	380.374	90586	1.49887
194	0.743	341.446	256	394	253.773	60436
195	0.743	560.367	464	645	416.482	99185	1.64295
196	0.743	341.073	297	382	253.496	60370
197	0.743	457.944	399	509	340.357	81056	1.61721
198	0.743	283.169	208	326	210.46	50121
199	0.743	409.028	356	462	304.002	72398	1.34459
200	0.743	304.203	231	355	226.093	53844
201	0.743	454.52	409	510	337.813	80450	1.45036
202	0.743	313.384	266	363	232.917	55469
203	0.743	470.328	399	552	349.562	83248	1.68522
204	0.743	279.09	210	348	207.428	49399
205	0.743	483.684	396	560	359.488	85612	1.7443
206	0.743	277.294	173	353	206.093	49081
207	0.743	425.486	358	485	316.234	75311	1.62912
208	0.743	261.175	203	346	194.113	46228
209	0.743	424.175	313	502	315.26	75079	1.53511
210	0.743	276.316	200	336	205.367	48908
211	0.743	373.017	335	431	277.237	66024	1.44577
212	0.743	258.006	176	304	191.758	45667
213	0.743	394.113	255	469	292.917	69758	1.56686
214	0.743	251.531	209	312	186.945	44521
215	0.743	437.424	349	525	325.106	77424	1.44015
216	0.743	303.734	250	400	225.745	53761
217	0.743	420.243	363	500	312.337	74383	1.6776
218	0.743	250.503	150	352	186.181	44339
219	0.743	415.13	337	482	308.537	73478	1.37969
220	0.743	300.887	259	349	223.628	53257
221	0.743	431.977	371	492	321.059	76460	1.47863
222	0.743	292.147	243	353	217.132	51710
223	0.743	334.333	283	388	248.487	59177	1.61404
224	0.743	207.141	147	286	153.954	36664
225	0.743	412.226	363	469	306.379	72964	1.76921
226	0.743	233	171	290	173.173	41241
227	0.743	492.695	434	546	366.186	87207	1.50341
228	0.743	327.718	249	419	243.57	58006
229	0.743	470.678	398	521	349.822	83310	1.51382
230	0.743	310.921	254	354	231.086	55033
231	0.743	452.808	388	528	336.54	80147	1.45634
232	0.743	310.921	264	351	231.086	55033
233	0.743	471.395	405	548	350.355	83437	1.72583
234	0.743	273.141	221	317	203.007	48346
235	0.743	454.266	401	562	337.624	80405	1.55354
236	0.743	292.407	237	350	217.326	51756
237	0.743	447.119	361	521	332.312	79140	1.47262
238	0.743	303.621	228	377	225.661	53741
239	0.743	384.859	318	447	286.039	68120	1.45378
240	0.743	264.729	193	320	196.754	46857
241	0.743	429.819	386	497	319.455	76078	1.56946
242	0.743	273.864	207	335	203.544	48474
243	0.743	394.305	311	459	293.059	69792	1.59521
244	0.743	247.181	138	332	183.712	43751
245	0.743	417.893	362	471	310.59	73967	1.59846
246	0.743	261.435	199	310	194.306	46274
247	0.743	359.898	301	406	267.487	63702	1.68115
248	0.743	214.079	141	284	159.11	37892
249	0.743	371.91	309	431	276.414	65828	1.62586
250	0.743	228.746	146	276	170.011	40488
251	0.743	471.621	418	560	350.523	83477	1.53233
252	0.743	307.78	243	367	228.751	54477
253	0.743	498.282	421	575	370.339	88196	1.76466
254	0.743	282.367	205	345	209.864	49979
255	0.743	443.718	345	517	329.784	78538	1.76039
256	0.743	252.056	165	330	187.336	44614
257	0.743	414.13	360	479	307.794	73301	1.60677
258	0.743	257.74	207	304	191.56	45620

## Sheet: Figure 2B 665-745
	area	Min	Max	IntDen	RawIntDen	Raw N/C
1	4.56	1042	1231	5193.22	201598	1.53907
2	4.56	591	850	3374.26	130987
3	4.56	1085	1479	5922.39	229904	1.38098
4	4.56	872	1009	4288.54	166479
5	4.56	843	1308	5255.79	204027	1.46886
6	4.56	653	857	3578.15	138902
7	4.56	642	792	3286.34	127574	1.61005
8	4.56	348	538	2041.14	79236
9	4.56	1076	1308	5418.26	210334	1.46651
10	4.56	722	904	3694.66	143425
11	4.56	813	1068	4355.08	169062	1.47269
12	4.56	553	714	2957.22	114798
13	4.56	506	752	2999.65	116445	1.48675
14	4.56	387	520	2017.59	78322
15	4.56	901	1059	4393.54	170555	1.71828
16	4.56	340	690	2556.94	99259
17	4.56	750	986	4085.03	158579	1.39356
18	4.56	555	758	2931.36	113794
19	4.56	615	897	3443.45	133673	1.57702
20	4.56	319	586	2183.52	84763
21	4.56	833	1068	4275.87	165987	1.26221
22	4.56	659	818	3387.6	131505
23	4.56	544	709	2985.25	115886	1.52051
24	4.56	381	480	1963.32	76215
25	4.56	853	1086	4436.56	172225	1.46844
26	4.56	578	733	3021.26	117284
27	4.56	930	1150	4765.7	185002	1.43491
28	4.56	485	889	3321.24	128929
29	4.56	816	1032	4267.37	165657	1.43155
30	4.56	511	752	2980.95	115719
31	4.56	778	1002	4242.17	164679	1.46318
32	4.56	434	739	2899.29	112549
33	4.56	793	1002	4079.42	158361	1.49272
34	4.56	481	721	2732.88	106089
35	4.56	906	1134	4647.56	180416	1.25146
36	4.56	706	913	3713.7	144164
37	4.56	772	1129	4441.25	172407	1.53465
38	4.56	496	834	2893.98	112343
39	4.56	973	1387	5589.87	216996	1.49788
40	4.56	658	1007	3731.86	144869
41	4.56	941	1204	4905.03	190411	1.34576
42	4.56	550	911	3644.82	141490
43	4.56	703	962	3851.59	149517	1.31626
44	4.56	520	731	2926.16	113592
45	4.56	785	931	3914.66	151965	1.49531
46	4.56	496	669	2617.96	101628
47	4.56	686	844	3484.33	135260	1.31043
48	4.56	530	655	2658.92	103218
49	4.56	766	999	4092.51	158869	1.87147
50	4.56	344	578	2186.79	84890
51	4.56	834	977	4084.49	158558	1.45572
52	4.56	498	713	2805.83	108921
53	4.56	992	1172	4880.51	189459	1.61532
54	4.56	572	776	3021.39	117289
55	4.56	912	1102	4568.48	177346	1.88142
56	4.56	396	644	2428.21	94262
57	4.56	799	990	4080.63	158408	1.41756
58	4.56	365	731	2878.63	111747
59	4.56	835	999	4219.37	163794	1.68615
60	4.56	382	677	2502.38	97141
61	4.56	933	1218	4938.21	191699	1.58853
62	4.56	462	813	3108.67	120677
63	4.56	959	1203	4942.39	191861	1.54067
64	4.56	557	859	3207.95	124531
65	4.56	749	959	3855.23	149658	1.60043
66	4.56	344	676	2408.87	93511
67	4.56	920	1135	4645.65	180342	1.46392
68	4.56	632	758	3173.43	123191
69	4.56	1009	1366	5566.38	216084	1.8144
70	4.56	538	886	3067.89	119094
71	4.56	1130	1450	5850.31	227106	1.69432
72	4.56	609	906	3452.9	134040
73	4.56	744	943	3834.7	148861	1.70959
74	4.56	362	644	2243.05	87074
75	4.56	852	1023	4275.97	165991	1.46377
76	4.56	579	710	2921.21	113400
77	4.56	678	893	3660.97	142117	1.58939
78	4.56	431	616	2303.38	89416
79	4.56	730	1014	4076.89	158263	1.63045
80	4.56	403	666	2500.47	97067
81	4.56	719	958	3830.7	148706	1.34033
82	4.56	484	694	2858.02	110947
83	4.56	723	909	3744.07	145343	1.33429
84	4.56	466	767	2806.04	108929
85	4.56	720	890	3713.01	144137	1.40426
86	4.56	446	668	2644.11	102643
87	4.56	534	718	2985.05	115878	1.45592
88	4.56	408	494	2050.28	79591
89	4.56	760	976	4049.67	157206	1.30161
90	4.56	591	768	3111.27	120778
91	4.56	1304	1594	6656.89	258417	1.59989
92	4.56	783	1040	4160.85	161522
93	4.56	903	1306	5247.8	203717	1.88323
94	4.56	432	758	2786.59	108174
95	4.56	774	934	3939.26	152920	1.28776
96	4.56	599	753	3059	118749
97	4.56	953	1306	5269.16	204546	1.94659
98	4.56	405	750	2706.86	105079
99	4.56	796	1280	4916.03	190838	1.5939
100	4.56	452	855	3084.28	119730
101	4.56	972	1161	4970.44	192950	1.75053
102	4.56	499	739	2839.4	110224
103	4.56	791	1025	4159.3	161462	1.83992
104	4.56	252	661	2260.59	87755
105	4.56	747	925	3849.43	149433	1.64516
106	4.56	347	616	2339.86	90832
107	0.743	455	598	385.245	91746	1.41971
108	0.743	281	421	271.355	64623
109	0.743	392	536	355.277	84609	1.38372
110	0.743	261	405	256.754	61146
111	0.743	392	568	360.488	85850	1.47984
112	0.743	168	412	243.599	58013
113	0.743	407	560	358.879	85467	1.42031
114	0.743	244	427	252.677	60175
115	0.743	340	492	309.146	73623	1.36485
116	0.743	173	369	226.505	53942
117	0.743	386	510	334.059	79556	1.54814
118	0.743	227	358	215.78	51388
119	0.743	413	553	360.924	85954	1.4587
120	0.743	200	391	247.428	58925
121	0.743	511	684	444.246	105797	1.72699
122	0.743	105	434	257.237	61261
123	0.743	495	638	423.095	100760	1.54117
124	0.743	215	449	274.529	65379
125	0.743	541	709	464.195	110548	1.66025
126	0.743	148	496	279.593	66585
127	0.743	422	566	368.722	87811	1.37012
128	0.743	292	419	269.116	64090
129	0.743	482	628	420.009	100025	1.38288
130	0.743	254	497	303.721	72331
131	0.743	415	527	348.235	82932	1.58204
132	0.743	178	384	220.118	52421
133	0.743	432	674	429.558	102299	1.90629
134	0.743	184	477	225.337	53664
135	0.743	433	595	368.89	87851	1.92626
136	0.743	165	344	191.506	45607
137	0.743	363	546	342.629	81597	1.47122
138	0.743	203	403	232.887	55462
139	0.743	376	544	337.93	80478	1.51317
140	0.743	168	398	223.326	53185
141	0.743	412	581	374.533	89195	1.42525
142	0.743	170	427	262.784	62582
143	0.743	379	502	327.374	77964	1.35961
144	0.743	249	385	240.786	57343
145	0.743	520	659	437.993	104308	1.6528
146	0.743	205	470	265.001	63110
147	0.743	404	595	364.863	86892	1.38398
148	0.743	191	462	263.633	62784
149	0.743	375	571	361.617	86119	1.31147
150	0.743	273	424	275.734	65666
151	0.743	512	693	436.536	103961	1.53416
152	0.743	237	457	284.544	67764
153	0.743	503	636	424.951	101202	1.58507
154	0.743	256	426	268.096	63847
155	0.743	411	578	368.55	87770	1.49289
156	0.743	208	438	246.87	58792
157	0.743	401	523	342.747	81625	1.46794
158	0.743	199	368	233.488	55605
159	0.743	482	678	423.221	100790	1.32085
160	0.743	349	507	320.416	76307
161	0.743	476	636	409.49	97520	1.40768
162	0.743	229	502	290.897	69277
163	0.743	417	560	356.137	84814	1.60114
164	0.743	232	382	222.427	52971
165	0.743	406	548	352.232	83884	1.48976
166	0.743	252	379	236.435	56307
167	0.743	471	619	403.133	96006	1.48598
168	0.743	251	457	271.292	64608
169	0.743	532	695	442.167	105302	1.4643
170	0.743	228	555	301.966	71913
171	0.743	512	693	433.639	103271	1.5948
172	0.743	268	473	271.909	64755
173	0.743	388	530	347.836	82837	1.41885
174	0.743	194	413	245.153	58383
175	0.743	416	551	355.659	84700	1.41802
176	0.743	170	404	250.813	59731
177	0.743	397	621	372.652	88747	1.55696
178	0.743	258	400	239.345	57000
179	0.743	370	621	377.632	89933	1.59103
180	0.743	241	394	237.351	56525
181	0.743	455	658	414.538	98722	1.52544
182	0.743	216	456	271.749	64717
183	0.743	533	673	450.385	107259	1.44669
184	0.743	313	498	311.321	74141
185	0.743	418	558	362.969	86441	1.4814
186	0.743	228	391	245.018	58351
187	0.743	489	649	417.473	99421	1.47629
188	0.743	293	436	282.784	67345
189	0.743	413	572	370.393	88209	1.64581
190	0.743	161	392	225.052	53596
191	0.743	475	685	432.711	103050	1.55268
192	0.743	256	483	278.686	66369
193	0.743	486	621	406.971	96920	1.6519
194	0.743	237	457	246.366	58672
195	0.743	499	660	429.23	102221	1.6177
196	0.743	283	445	265.333	63189
197	0.743	447	647	396.301	94379	1.40854
198	0.743	206	469	281.357	67005
199	0.743	465	619	397.615	94692	1.45532
200	0.743	284	467	273.215	65066

## Sheet: Figure 2B 704-782
	area	Min	Max	IntDen	RawIntDen	Raw N/C
1	1.546	751	817	1221.24	47408	1.26099
2	1.546	592	663	968.482	37596
3	1.546	642	741	1079.51	41906	1.34707
4	1.546	481	555	801.376	31109
5	1.546	771	880	1273.61	49441	1.247
6	1.546	606	713	1021.34	39648
7	1.546	737	848	1239.76	48127	1.28685
8	1.546	547	685	963.408	37399
9	1.546	571	621	916.653	35584	1.25111
10	1.546	433	502	732.673	28442
11	1.546	538	605	889.321	34523	1.24893
12	1.546	428	491	712.065	27642
13	1.546	475	533	786.074	30515	1.12556
14	1.546	423	477	698.386	27111
15	1.546	665	727	1069.15	41504	1.23271
16	1.546	512	590	867.322	33669
17	1.546	625	702	1017.12	39484	1.23384
18	1.546	495	580	824.354	32001
19	1.546	545	593	885.071	34358	1.28851
20	1.546	415	477	686.897	26665
21	1.546	612	696	1018.41	39534	1.26655
22	1.546	471	562	804.08	31214
23	1.546	644	776	1090.84	42346	1.26082
24	1.546	480	629	865.184	33586
25	1.546	615	699	1025.95	39827	1.17142
26	1.546	524	613	875.823	33999
27	1.546	645	748	1108	43012	1.34986
28	1.546	486	574	820.825	31864
29	1.546	640	740	1078.66	41873	1.25684
30	1.546	505	605	858.228	33316
31	1.546	652	764	1098.55	42645	1.2553
32	1.546	507	638	875.127	33972
33	1.546	501	563	823.581	31971	1.22649
34	1.546	392	469	671.492	26067
35	1.546	463	548	781.695	30345	1.12539
36	1.546	415	477	694.599	26964
37	1.546	566	631	906.89	35205	1.41369
38	1.546	378	444	641.508	24903
39	1.546	596	651	962.789	37375	1.31251
40	1.546	431	507	733.549	28476
41	1.546	544	600	886.281	34405	1.23329
42	1.546	425	505	718.634	27897
43	1.546	657	719	1070.29	41548	1.26443
44	1.546	526	575	846.456	32859
45	1.546	605	657	978.477	37984	1.15299
46	1.546	508	589	848.646	32944
47	1.546	667	732	1077.89	41843	1.18492
48	1.546	548	640	909.672	35313
49	1.546	700	786	1153.34	44772	1.31729
50	1.546	515	609	875.539	33988
51	1.546	647	724	1050.45	40778	1.38174
52	1.546	456	532	760.236	29512
53	1.546	601	711	1017.89	39514	1.24348
54	1.546	496	570	818.583	31777
55	1.546	648	724	1074.87	41726	1.23424
56	1.546	529	595	870.877	33807
57	1.546	616	680	1001.69	38885	1.17587
58	1.546	516	586	851.866	33069
59	1.546	689	772	1127.89	43784	1.45399
60	1.546	439	538	775.718	30113
61	1.546	588	650	965.52	37481	1.23423
62	1.546	474	547	782.287	30368
63	1.546	562	635	924.097	35873	1.09372
64	1.546	521	577	844.91	32799
65	1.546	408	519	718.762	27902	1.21869
66	1.546	352	414	589.781	22895
67	1.546	454	495	736.769	28601	1.26704
68	1.546	355	402	581.486	22573
69	1.546	490	542	790.067	30670	1.24639
70	1.546	378	443	633.882	24607
71	1.546	470	506	752.019	29193	1.28366
72	1.546	351	399	585.84	22742
73	1.546	584	705	1015.08	39405	1.16304
74	1.546	527	605	872.783	33881
75	1.546	640	708	1038.01	40295	1.29014
76	1.546	457	563	804.57	31233
77	1.546	767	878	1272.4	49394	1.35326
78	1.546	573	639	940.249	36500
79	1.546	612	678	1008.64	39155	1.26331
80	1.546	479	556	798.413	30994
81	1.546	621	679	1008.67	39156	1.29091
82	1.546	463	554	781.36	30332
83	1.546	548	625	904.829	35125	1.24134
84	1.546	434	494	728.912	28296
85	1.546	464	506	749.134	29081	1.14713
86	1.546	397	443	653.048	25351
87	1.546	549	640	938.6	36436	1.2715
88	1.546	424	525	738.186	28656
89	1.546	482	540	786.538	30533	1.14812
90	1.546	406	466	685.068	26594
91	1.546	391	442	650.524	25253	1.20764
92	1.546	325	363	538.673	20911
93	1.546	393	467	667.139	25898	1.16826
94	1.546	337	396	571.053	22168
95	1.546	604	701	1026.98	39867	1.25301
96	1.546	499	556	819.614	31817
97	1.546	489	555	805.137	31255	1.15875
98	1.546	422	480	694.831	26973
99	1.546	604	682	999.884	38815	1.32542
100	1.546	447	530	754.389	29285
101	1.546	600	655	965.752	37490	1.18355
102	1.546	474	568	815.982	31676
103	1.546	461	523	774.662	30072	1.43803
104	1.546	299	389	538.698	20912
105	1.546	600	674	978.323	37978	1.43943
106	1.546	371	496	679.658	26384
107	1.546	560	627	927.524	36006	1.62688
108	1.546	321	412	570.126	22132
109	1.546	425	498	716.032	27796	1.33116
110	1.546	316	370	537.9	20881
111	1.546	444	498	733.497	28474	1.30286
112	1.546	321	408	562.99	21855
113	1.546	469	512	760.649	29528	1.26404
114	1.546	344	427	601.759	23360
115	1.546	523	603	877.265	34055	1.41778
116	1.546	346	448	618.761	24020
117	1.546	432	489	720.54	27971	1.21666
118	1.546	349	418	592.228	22990
119	1.546	650	729	1068.95	41496	1.57402
120	1.546	363	502	679.117	26363
121	1.546	480	535	786.409	30528	1.35008
122	1.546	326	409	582.491	22612
123	1.546	483	547	803.076	31175	1.26092
124	1.546	372	448	636.896	24724
125	1.546	520	620	883.937	34314	1.46697
126	1.546	341	436	602.558	23391
127	1.546	600	655	970.749	37684	1.3262
128	1.546	426	533	731.978	28415
129	1.546	616	673	990.971	38469	1.26219
130	1.546	477	536	785.121	30478
131	1.546	611	670	991.229	38479	1.37622
132	1.546	425	515	720.257	27960
133	1.546	516	596	852.098	33078	1.25443
134	1.546	407	463	679.272	26369
135	1.546	561	609	910.857	35359	1.47256
136	1.546	323	446	618.555	24012
137	1.546	703	768	1145.35	44462	1.29797
138	1.546	531	611	882.417	34255
139	1.546	595	668	975.154	37855	1.1891
140	1.546	498	555	820.078	31835
141	1.546	621	698	1034.27	40150	1.23432
142	1.546	503	576	837.929	32528
143	1.546	505	596	850.706	33024	1.21945
144	1.546	419	488	697.613	27081
145	1.546	561	640	922.243	35801	1.2919
146	1.546	412	493	713.868	27712
147	1.546	591	659	958.745	37218	1.25199
148	1.546	444	539	765.775	29727
149	1.546	566	618	914.824	35513	1.34087
150	1.546	411	472	682.26	26485
151	1.546	473	540	780.278	30290	1.3696
152	1.546	334	396	569.714	22116
153	1.546	645	734	1075.1	41735	1.20852
154	1.546	550	601	889.604	34534
155	1.546	515	626	889.939	34547	1.31273
156	1.546	391	475	677.932	26317
157	1.546	633	683	1020.05	39598	1.40463
158	1.546	435	495	726.207	28191
159	1.546	593	653	952.408	36972	1.33589
160	1.546	421	498	712.941	27676
161	1.546	643	699	1036.36	40231	1.24162
162	1.546	501	576	834.684	32402
163	1.546	626	702	1034.89	40174	1.28065
164	1.546	473	565	808.099	31370
165	1.546	629	707	1041.46	40429	1.28517
166	1.546	473	573	810.366	31458
167	0.743	279	393	253.937	60475	1.14052
168	0.743	231	361	222.65	53024
169	0.743	232	328	207.789	49485	1.33092
170	0.743	139	246	156.125	37181
171	0.743	252	353	225.178	53626	1.25262
172	0.743	198	281	179.765	42811
173	0.743	246	330	211.266	50313	1.19761
174	0.743	181	295	176.406	42011
175	0.743	257	355	236.742	56380	1.1864
176	0.743	231	322	199.547	47522
177	0.743	266	385	237.687	56605	1.24791
178	0.743	200	301	190.468	45360
179	0.743	265	367	241.176	57436	1.20021
180	0.743	204	320	200.945	47855
181	0.743	222	308	199.135	47424	1.11641
182	0.743	201	286	178.371	42479
183	0.743	281	370	240.513	57278	1.20153
184	0.743	218	325	200.172	47671
185	0.743	259	374	235.264	56028	1.34237
186	0.743	201	272	175.26	41738
187	0.743	251	347	216.759	51621	1.34978
188	0.743	186	268	160.588	38244
189	0.743	213	293	189.557	45143	1.2513
190	0.743	165	242	151.489	36077
191	0.743	247	340	214.445	51070	1.1734
192	0.743	212	280	182.755	43523
193	0.743	240	358	228.445	54404	1.32813
194	0.743	164	276	172.005	40963
195	0.743	278	367	238.455	56788	1.23479
196	0.743	195	307	193.114	45990
197	0.743	217	321	199.748	47570	1.33003
198	0.743	142	249	150.183	35766
199	0.743	226	338	209.927	49994	1.23929
200	0.743	182	259	169.393	40341
201	0.743	244	354	217.527	51804	1.2839
202	0.743	181	266	169.427	40349
203	0.743	231	317	200.928	47851	1.23391
204	0.743	187	271	162.839	38780
205	0.743	250	356	228.1	54322	1.20267
206	0.743	223	303	189.662	45168
207	0.743	273	353	224.926	53566	1.32445
208	0.743	174	278	169.826	40444
209	0.743	235	341	208.516	49658	1.18321
210	0.743	182	275	176.23	41969
211	0.743	193	262	165.178	39337	1.18944
212	0.743	159	216	138.871	33072
213	0.743	254	373	225.883	53794	1.12272
214	0.743	229	337	201.193	47914
215	0.743	255	354	222.579	53007	1.28855
216	0.743	194	273	172.736	41137
217	0.743	209	292	184.292	43889	1.10149
218	0.743	194	252	167.311	39845
219	0.743	222	358	215.465	51313	1.19555
220	0.743	200	290	180.223	42920
221	0.743	233	305	199.929	47613	1.2951
222	0.743	178	240	154.374	36764
223	0.743	252	370	226.265	53885	1.4601
224	0.743	172	248	154.966	36905
225	0.743	252	361	229.146	54571	1.22403
226	0.743	190	297	187.206	44583
227	0.743	290	391	251.128	59806	1.19737
228	0.743	230	338	209.734	49948
229	0.743	263	351	222.788	53057	1.23895
230	0.743	196	290	179.82	42824
231	0.743	264	378	227.559	54193	1.29293
232	0.743	196	288	176.003	41915
233	0.743	234	332	208.995	49772	1.31141
234	0.743	179	269	159.366	37953
235	0.743	207	295	183.154	43618	1.24028
236	0.743	165	238	147.672	35168
237	0.743	209	296	186.051	44308	1.1612
238	0.743	180	262	160.223	38157
239	0.743	269	361	233.24	55546	1.29632
240	0.743	208	298	179.925	42849
241	0.743	236	334	213.546	50856	1.26319
242	0.743	178	277	169.053	40260
243	0.743	263	347	226.047	53833	1.38613
244	0.743	183	261	163.078	38837
245	0.743	196	327	197.124	46945	1.29991
246	0.743	167	244	151.644	36114
247	0.743	240	398	244.993	58345	1.28298
248	0.743	200	319	190.956	45476
249	0.743	229	396	255.533	60855	1.23714
250	0.743	224	323	206.551	49190
251	0.743	277	389	251.56	59909	1.2622
252	0.743	223	320	199.303	47464
253	0.743	231	361	222.213	52920	1.18564
254	0.743	222	295	187.42	44634
255	0.743	246	360	227.143	54094	1.2682
256	0.743	179	306	179.106	42654
257	0.743	259	361	221.487	52747	1.27785
258	0.743	198	271	173.328	41278
259	0.743	262	364	222.742	53046	1.28239
260	0.743	195	282	173.693	41365
261	0.743	269	406	247.193	58869	1.29607
262	0.743	207	299	190.725	45421
263	0.743	295	415	258.896	61656	1.29655
264	0.743	208	338	199.681	47554
265	0.743	255	386	232.178	55293	1.33381
266	0.743	190	277	174.071	41455
267	0.743	259	383	234.038	55736	1.24194
268	0.743	222	292	188.445	44878
269	0.743	216	326	213.16	50764	1.24257
270	0.743	184	268	171.548	40854
271	0.743	230	317	198.514	47276	1.26888
272	0.743	175	238	156.448	37258
273	0.743	179	280	172.308	41035	1.19681
274	0.743	152	234	143.972	34287
275	0.743	242	317	202.213	48157	1.31645
276	0.743	166	259	153.605	36581

[truncated: 1 more sheets: Figure 2B 746-782]
