# Supplementary material for: Kap-β2/Transportin mediates β-catenin nuclear transport in Wnt signaling
Source: eLife. 2022 Oct 27;11:e70495. doi: 10.7554/eLife.70495 (PMC9665845; doi:10.7554/eLife.70495)
Supplement: Figure 3—source data 1. [file elife-70495-fig3-data1.xlsx]

## Sheet: Figure 3C
N/C ratio	1635-Rap	1635+Rap	Kap95-Rap	Kap95+Rap	Kap104-Rap	Kap104+Rap	Kap108-Rap	Kap108+Rap	Kap111-Rap	Kap111+Rap	Kap114-Rap	Kap114+Rap	Kap119-Rap	Kap119+Rap	Kap120-Rap	Kap120+Rap	Kap121-Rap	Kap121+Rap	Kap122-Rap	Kap122+Rap	Kap123-Rap	Kap123+Rap
1	1.31193	1.43969	1.47731	1.56672	1.62442	1.12309	1.45752	1.75911	1.51877	1.6701	1.58794	1.9053	1.80315	1.64451	1.56672	1.55816	1.44244	1.39481	1.92945	1.65455	1.68076	2.02114
2	1.33806	1.45902	1.4808	1.60856	1.57114	1.17565	1.81193	1.33639	1.7724	1.56786	1.96195	1.44041	1.4849	1.53867	1.60856	1.45504	1.33095	1.69725	1.81802	1.58035	1.72557	1.51615
3	1.53315	1.3781	1.51126	1.6556	1.50769	1.27668	2.81499	1.62508	1.55281	1.5643	1.55124	1.69091	1.65357	1.7689	1.6556	1.52032	1.35387	1.38401	1.92573	1.64409	1.50264	1.46531
4	1.42064	1.55728	1.56326	1.42584	1.49939	1.34964	1.49032	2.4037	1.54846	1.54098	1.66546	2.06585	1.70644	1.67749	1.42584	1.44331	1.61441	1.49816	1.70865	1.50591	1.72368	1.69715
5	1.77207	1.38972	1.67558	1.42626	1.90536	1.05388	1.53247	1.95239	1.50453	1.42978	1.84587	1.85128	1.74354	1.70259	1.42626	1.54964	1.42654	1.46803	1.46992	1.6759	1.50372	1.94638
6	1.2964	1.4904	1.55678	1.69178	1.75776	1.18346	1.96897	1.77904	1.53919	1.51445	1.91776	1.74479	1.71901	1.72226	1.69178	1.5173	1.43724	1.42578	1.48813	1.57439	1.65132	1.61583
7	1.30159	1.31665	1.61995	1.44254	1.60857	1.25205	1.6428	1.68632	1.2742	1.39363	1.69359	1.78786	1.59296	1.81043	1.44254	1.49899	1.5731	1.55002	1.61702	1.65746	1.53195	1.79582
8	1.51059	1.43463	2.23904	1.42052	1.55862	1.22855	1.86278	1.84381	1.53687	1.56497	1.67759	1.524	1.36756	1.42715	1.42052	1.43351	1.54592	1.78071	1.50677	1.45578	1.5429	1.69367
9	1.38931	1.67881	1.77935	1.40883	1.48725	1.30112	1.61745	1.59055	1.71083	1.61669	1.85889	1.78102	1.6644	1.72812	1.40883	1.44245	1.46291	1.77325	1.74613	1.70934	1.32573	1.59473
10	1.58259	1.40465	1.50176	1.58368	1.56626	1.12376	1.74381	1.63032	1.58232	1.48322	2.02312	1.9524	1.84301	1.4139	1.58368	1.69616	1.51956	1.65671	1.59381	1.56349	1.52594	1.44319
11	1.51353	1.55214	1.49398	1.74021	1.60209	1.09285	1.43956	1.45038	1.53574	1.70556	1.89767	1.71122	1.56741	1.52555	1.74021	1.70734	1.55901	1.69503	1.96002	1.36207	1.64662	1.59072
12	1.41937	1.45136	1.6659	1.47753	1.66105	1.01857	1.73529	2.11362	1.46257	1.65701	1.58974	1.51091	1.35877	1.64493	1.47753	1.50279	1.35275	1.48258	1.67206	1.73896	1.63306	1.82544
13	1.52222	1.50899	1.78878	1.55288	1.61315	1.38247	1.84699	1.76148	1.32475	1.39929	1.41055	2.06792	1.5418	1.50199	1.55288	1.70461	1.62349	1.4631	1.35021	1.70716	1.79225	1.7224
14	1.51769	1.72903	1.56064	1.31501	1.76513	1.21748	2.24101	1.70615	1.5356	1.4355	1.55288	1.72671	1.357	1.42877	1.31501	1.72314	1.40248	1.57041	1.7691	1.60745	1.71559	1.71773
15	1.48034	1.45487	1.48712	1.70019	1.58343	1.19273	1.76762	1.93806	1.46843	1.49044	1.77026	1.7009	1.69155	1.73624	1.70019	1.52661	1.54688	1.58664	1.76078	1.52114	1.55266	1.95722
16	1.58826	1.47178	1.49325	1.63591	1.56874	1.02573	1.77598	2.29041	1.68374	1.70836	1.68597	1.46931	1.83262	2.02178	1.63591	1.35937	1.56531	1.64346	1.52816	1.38149	2.0643	1.72068
17	1.4859	1.35808	1.68205	1.3392	1.62841	1.2301	1.93912	2.02412	1.54614	1.44641	1.54811	1.84039	1.57164	1.59437	1.3392	1.3079	1.64178	1.51289	1.51487	1.6377	1.67098	1.96999
18	1.4712	1.62389	1.41954	1.38288	1.69272	1.21375	2.22212	1.78658	1.39016	1.57119	1.73657	1.67835	1.45959	1.50561	1.38288	1.57329	1.36042	1.55403	1.55919	1.70656	1.82552	1.57682
19	1.41897	1.45137	1.42219	1.37089	1.5757	1.4483	1.60596	1.81486	1.71841	1.41279	1.50314	1.52283	1.58251	1.45823	1.37089	1.43964	1.48353	1.46878	1.7305	1.42286	1.68187	1.65118
20	1.42462	1.60004	1.66398	1.49733	1.63798	1.2663	1.63304	1.6319	1.579	1.35885	1.67913	1.70971	1.62126	1.49839	1.49733	1.65756	1.79905	1.58294	1.72635	1.62562	1.93562	1.90872
21	1.53472	1.37025	1.52281	1.61597	1.71132	1.30098	1.60871	1.78926	1.52517	1.72016	1.51947	1.53101	1.64483	1.63984	1.61597	1.77851	1.60683	1.7307	1.42243	1.73759	1.52432	2.04179
22	1.37313	1.47163	1.81353	1.6409	1.80787	1.13305	1.48722	1.94581	1.60307	1.74898	1.78284	1.65207	2.13764	1.58146	1.6409	1.61656	1.45363	1.6791	2.00476	1.61873	1.57756	2.25529
23	1.52504	1.59823	1.44795	1.60989	1.41279	1.2453	1.75835	1.67729	1.61778	1.62782	1.6192	1.45013	1.55265	1.86568	1.60989	1.69293	1.62682	1.61415	1.4258	2.00135	1.75328	1.67005
24	1.36882	1.41677	1.43144	1.78707	1.54032	1.01665	2.07078	1.62072	1.54635	1.36118	1.47399	1.72341	1.27253	1.51059	1.78707	1.40294	1.57646	1.46141	1.65011	1.72531	2.21682	2.00476
25	1.39067	1.57539	1.62553	1.36015	1.71047	1.22142	1.83804	1.59874	1.50491	1.45072	1.91782	1.50642	1.44398	1.63799	1.36015	1.49998	1.58887	1.62721	1.5344	1.61833	1.55	1.58961
26	1.28422	1.43143	1.64249	1.33773	1.51631	1.2694	1.64298	1.64475	1.56305	1.52715	1.70147	1.63547	2.13433	1.7736	1.33773	1.77826	1.48575	1.51471	1.70792	1.7449	1.6698	2.00394
27	1.52602	1.35721	1.73789	1.41166	1.69651	1.20964	1.67494	1.7687	1.74545	1.69738	1.40957	1.72589	1.75585	1.89055	1.41166	1.54711	1.51207	1.40158	1.69283	1.70312	1.50786	1.82661
28	1.54747	1.23802	1.60949	1.46789	1.32833	1.12087	1.73343	1.51369	1.62796	1.44659	1.48807	1.37736	1.43187	2.03028	1.46789	1.54484	1.70841	1.37337	1.68574	1.65459	1.88344	1.94515
29	1.40467	1.40944	1.43973	1.50638	1.68749	1.1283	1.95072	1.86258	1.5642	1.64507	1.72342	1.52552	1.42788	1.75583	1.50638	1.41301	1.44307	1.47893	1.37336	1.62616	1.66244	1.66544
30	1.57025	1.5004	1.55106	1.48363	1.48332	1.13055	1.64308	1.71512	1.67026	1.54062	1.58342	1.43356	1.53712	1.7048	1.48363	1.532	1.68704	1.30822	1.63436	1.91022	1.62639	1.67054
31	1.46167	1.41796	1.33149	1.55852	1.50156	1.05828	1.87002	1.79745	1.49165	1.52023	1.63654	1.69132	1.61138	1.85317	1.55852	1.61023	1.40926	1.35386	1.98004	2.15383	1.95939	1.7202
32	1.37367	1.55213	1.44412	1.56317	1.71875	1.26045	1.84001	1.75434	1.51615	1.53127	1.97233	1.69133	1.89529	1.68145	1.56317	1.54179	1.5658	1.46917	1.4566	2.08266	1.68609	1.80598
33	1.35273	1.45378	1.55901	1.79957	1.46752	1.20455	1.94025	1.76174	1.56258	1.67008	1.55704	1.82635	1.64399	1.79343	1.79957	1.53513	1.46484	1.6149	1.61258	1.56621	1.72118	1.65873
34	1.3654	1.52821	1.79369	1.74537	1.54483	1.21393	1.46567	1.90191	1.63672	1.43375	1.71157	1.44555	1.68683	1.7653	1.74537	1.6563	1.55793	1.59267	1.53243	1.54113	1.33704	1.6827
35	1.46867	1.41559	1.3889	1.76923	1.35619	1.24297	1.55418	1.92578	1.65028	1.57976	1.57951	1.45854	1.3433	2.08484	1.76923	1.33724	1.57345	1.74151	1.46241	1.74372	1.87682	1.92397
36	1.32983	1.54262	1.65095	1.48265	1.72513	1.53957	1.68456	1.75899	1.49255	1.41293	1.87341	1.72616	1.64216	1.62984	1.48265	1.70047	2.02041	1.55189	1.93718	1.78523	2.29611	1.67362
37	1.36781	1.47902	1.74173	1.48433	1.61594	1.18365	1.68263	1.65961	1.46508	1.52471	1.76925	1.61267	1.47898	1.70525	1.48433	1.48507	1.40876	1.55251	1.56966	2.82876	1.65747	1.79899
38	1.58582	1.50789	1.64313	1.89123	1.47249	1.26221	1.98972	1.61209	1.58478	1.48231	1.48056	1.75778	1.6527	1.7152	1.89123	1.84524	1.91613	1.88021	1.56045	1.76802	1.83048	1.85997
39	1.41668	1.70296	1.54241	1.47112	1.42212	1.23513	1.70955	1.53369	1.74348	1.5169	1.51185	1.55158	1.3839	2.219	1.47112	1.61965	1.59693	1.64324	1.67981	1.61601	1.57857	1.82231
40	1.49569	1.6452	1.49113	1.75394	1.40591	1.21988	2.08896	1.74023	1.4303	1.52951	1.51406	2.25673	1.70167	1.89263	1.75394	1.58089	1.40553	2.03921	1.50417	1.95684	1.68143	1.33083
41	1.47467	1.82721	1.73664	1.61594	1.39026	1.13514	1.99142	1.65924	1.40084	1.66661	1.33831	1.57351	1.37263	1.31013	1.61594	1.63765	1.64077	1.83071	1.60771	1.50529	1.59017	1.54337
42	1.40544	1.58842	1.6764	1.57739	1.41174	1.35541	1.70206	1.9005	1.8511	1.44519	1.95113	1.38983	1.44162	1.68009	1.57739	1.69558	1.67951	1.71909	1.74405	1.41161	1.63985	2.07659
43	1.58676	1.44101	1.58818	1.49681	1.6174	1.07909	1.64978	1.84389	1.56264	1.70955	1.92899	1.72177	1.74082	1.98614	1.49681	1.51539	1.65611	2.17474	1.42431	1.76794	1.60799	1.56221
44	1.4789	1.54525	1.57207	1.69406	1.67241	1.10329	1.94453	1.51642	1.81197	1.70812	1.58845	1.57746	1.58881	1.63497	1.69406	1.63811	1.61612	1.58749	1.52377	2.14766	1.59009	1.48459
45	1.50364	1.76624	1.50421	1.86377	1.7138	1.21894	1.75484	1.85729	1.7123	1.58936	1.67218	1.53605	1.57688	1.65928	1.86377	1.67853	1.66941	1.66044	1.60035	1.50775	1.55748	1.63727
46	1.53068	1.49377	1.6225	1.63185	1.51809	0.990105	1.9278	1.56365	1.72481	1.51901	1.8077	1.91387	1.62582	1.93835	1.63185	2.00601	1.76771	1.63786	1.6601	1.87321	1.73209	1.52412
47	1.36336	1.55053	1.83693	1.61145	1.67201	1.32412	1.47654	1.56357	1.82066	1.47929	1.65616	1.44022	1.61763	1.97827	1.61145	1.59502	2.10086	1.7052	1.7872	1.44986	1.39465	1.62961
48	1.41283	1.4618	1.59491	1.55547	1.43981	1.21796	1.53237	1.66055	1.70296	1.60832	1.55985	1.84299	1.42835	1.91357	1.55547	1.53293	1.57212	1.51446	1.69352	1.91565	1.46578	1.55185
49	1.61445	1.63443	1.68152	2.11472	1.53086	1.25882	1.97412	1.75974	1.63307	1.55442	2.07937	1.72559	1.41387	1.59131	2.11472	1.59536	2.04487	1.38461	1.41183	1.60799	1.79518	1.57095
50	1.71511	1.75552	1.33035	1.39828	1.53652	1.18147	2.01629	1.64911	1.63947	1.61515	1.52345	1.87257	1.50743	1.61903	1.39828	1.71479	1.67747	1.65049	1.45976	2.1748	1.74996	1.76222
51	1.38811	1.47218	1.69532	1.70727	1.69203	1.50367	1.67083	1.62721	1.52186	1.44037	1.77111	1.83215	1.53371	1.56382	1.70727	1.6547	1.58932	2.06545	1.74091	1.69062	1.84	1.74118
52	1.39192	1.53119	1.44831	1.75314	1.51376	1.26495	1.77455	1.95592	1.49268	1.54295	1.6151	2.04536	1.6138	1.6861	1.75314	1.41995	1.86274	1.68616	1.46725	1.76588	1.53663	1.81045
53	1.52641	1.58429	1.91515	1.68438	1.6023	0.987887	1.84194	1.70807	1.57923	1.8409	1.55878	1.69498	1.66567	1.44026	1.68438	1.60436	1.6766	2.82211	1.68665	1.57468	1.56666	2.08082
54	1.37767	1.57345	1.53213	1.59424	1.58859	1.19467	1.8682	1.51326	1.75842	1.75794	1.82513	1.51313	1.73158	1.47241	1.59424	1.64158	1.61139	1.71408	1.47232	1.64809	1.96374	1.45344
55	1.82676	1.5263	1.54923	1.47138	1.47065	1.18631	1.50002	1.72908	1.36225	1.46148	1.39496	1.59244	1.42129	1.71636	1.47138	1.70966	1.73775	1.57691	1.44891	1.80055	1.63004	1.39963
56	1.70409	1.4374	1.65875	1.6584	1.61577	1.30009	1.82336	1.41749	1.49154	1.51883	1.52298	1.53673	1.57538	1.43968	1.6584	1.50212	1.66751	1.53855	1.56752	1.42348	1.78963	1.41209
57	1.64436	1.51059	1.61799	1.38335	1.49387	1.0822	1.65141	1.49032	1.50945	1.36408	1.61435	1.50872	1.49712	1.67547	1.38335	1.47591	1.42457	2.02734	1.90694	1.35711	1.40823	1.53134
58	1.50336	1.41261	1.39948	1.60536	1.6072	1.07961	1.41991	1.46266	1.5657	1.46721	1.65982	1.66334	1.42061	1.68008	1.60536	1.50107	1.44035	1.63475	1.48797	1.61587	1.47295	1.65808
59	1.432	1.39615	1.40354	1.49568	1.44347	1.09066	1.5883	1.61974	1.41138	1.5468	1.59206	1.6804	1.79764	1.67281	1.49568	1.40167	1.53519	1.65465	1.82814	1.6578	1.4866	1.46244
60	1.42932	1.51048	1.5042	1.3815	1.51769	1.08648	1.62211	1.46185	1.58817	1.33543	1.61524	1.42879	1.49913	1.45661	1.3815	1.50812	1.39975	1.74001	1.61362	1.42574	1.36305	1.40967
61	1.30691	1.58386	1.44508	1.65148	1.5937	1.02722	1.41359	1.47055	1.50629	1.52081	1.57648	1.80335	1.51017	1.36574	1.65148	1.65215	1.69116	1.42964	1.61613	1.33564	1.52727	1.64965
62	1.71259	1.34975	1.5601	1.6136	1.55861	1.10428	1.43752	1.46341	1.48406	1.59848	1.61567	1.65129	1.4434	1.43006	1.6136	2.0648	1.45449	1.51675	1.65727	1.46705	1.66278	1.43965
63	1.42156	1.61405	1.44205	1.58494	1.41546	1.20724	1.55385	1.44133	1.57676	1.47077	1.45073	1.44573	1.43164	1.48814	1.58494	1.89769	1.43563	1.48373	1.5768	1.52585	1.48056	1.38025
64	1.35837	1.46998	1.45468	1.41786	1.60449	1.1375	1.59801	1.5399	1.50045	1.39076	1.54085	1.80098	1.40494	1.50131	1.41786	1.55816	1.30294	1.81623	1.50012	1.6832	1.47146	1.48335
65	1.50937	1.77358	1.41109	1.60405	1.38579	1.12224	1.60017	1.82437	1.63698	1.41045	1.57939	1.73608	1.35021	1.4656	1.60405	1.45504	1.69422	1.43803	1.47347	1.64181	1.27615	1.63534
66	1.61116	1.5255	1.64695	1.55545	1.57969	1.07336	1.41558	1.70517	1.55399	1.77451	1.55181	1.87342	1.3751	1.21974	1.56672	1.52032	1.66289	1.78873	1.38782	1.68652	1.53603	1.56717
67	1.37679	1.36241	1.94494	1.43746	1.36724	1.02988	1.50556	1.47479	1.80935	1.49072	1.71708	1.32774	1.38098	1.46757	1.60856	1.44331	1.40154	1.52413	1.73234	1.66412	1.56783	1.42265
68	1.60487	1.52594	1.63114	1.5077	1.43563	1.04559	1.53469	1.53493	1.5109	1.82593	1.3918	1.64358	1.45924	1.54462	1.6556	1.54964	1.51191	1.58275	1.48433	1.67717	1.4683	1.48514
69	1.65319	1.84022	1.59685	1.53829	1.51729	1.0702	1.57881	1.63191	1.5024	1.675	1.62677	1.78469	1.49147	1.38254	1.42584	1.5173	1.63596	1.76334	1.81942	1.53911	1.46621	1.65052
70	1.60611	1.35516	1.43538	1.4108	1.7769	1.09954	1.41637	1.46179	1.58054	1.66756	1.48697	1.61815	1.3765	1.49585	1.42626	1.49899	1.59349	1.82258	1.39859	1.7699	1.37268	1.36133
71	1.56211	1.40628	1.36325	1.39583	1.43697	1.053	1.43066	1.54852	1.65475	1.57854	1.56676	1.64589	1.35204	1.52361	1.69178	1.43351	1.37924	1.70212	1.41868	1.77568	1.45621	1.45945
72	1.63858	1.31331	1.56383	1.47702	1.40178	0.911358	1.77433	1.50664	1.4815	1.43323	1.49071	1.63026	1.61802	1.65196	1.44254	1.44245	1.59139	1.60713	1.43589	1.57271	1.39418	1.79392
73	1.78544	1.42835	1.50272	1.45119	1.6665	1.05255	1.45108	1.57437	1.54961	1.49631	1.81381	1.40072	1.64016	1.38118	1.42052	1.69616	1.4226	1.47926	1.85363	1.56854	1.54246	1.43356
74	1.47006	1.61123	1.5212	1.45829	1.57038	1.33537	1.42353	1.45376	1.63373	1.3529	1.86863	1.51939	1.42893	1.54645	1.40883	1.70734	1.57192	1.82229	1.36221	1.72329	1.39221	1.51246
75	1.66755	1.43603	1.66381	1.48948	1.55414	1.24701	1.57565	1.45641	1.44009	1.34891	1.39994	1.47391	1.48495	1.34824	1.58368	1.50279	1.38306	1.78473	1.58292	1.4687	1.54572	1.4787
76	1.53342	1.4978	1.53514	1.55438	1.42999	1.11595	1.55238	1.51036	1.4336	1.56391	1.57302	1.46237	1.50794	1.45197	1.74021	1.70461	1.55363	1.6624	1.50222	1.37495	1.54766	1.39187
77	1.59467	1.69418	2.05879	1.58818	1.4637	1.07707	1.57217	1.47306	1.44317	1.48878	1.48498	1.68937	1.50802	1.37782	1.47753	1.72314	1.37846	1.53299	1.48935	1.68056	1.54645	1.52991
78	1.47543	1.58849	1.2563	1.41136	1.53234	1.07154	1.48659	1.53533	1.45786	1.41279	1.46567	1.80477	1.35688	1.65204	1.55288	1.52661	1.53623	1.86947	1.68884	1.46142	1.36696	1.44582
79	1.63836	1.48559	1.59947	1.53145	1.46659	1.08996	1.47672	1.66854	1.58669	1.4421	1.67679	1.34182	1.47008	1.50101	1.31501	1.35937	1.38181	1.59288	1.38588	1.56651	1.48699	1.40628
80	1.48147	1.52793	1.50758	1.46239	1.48832	1.24497	1.43294	1.42688	1.4299	1.40938	1.89119	1.49204	1.43161	1.51233	1.70019	1.3079	1.40379	1.47336	1.66841	1.54583	1.62267	1.5013
81	1.44587	1.44782	1.66637	1.69995	1.43263	1.09357	1.48749	1.565	1.46216	1.65206	1.6226	1.63951	1.60364	1.57566	1.63591	1.57329	1.53341	1.63524	1.4057	1.44509	1.66046	1.44057
82	1.57085	1.65035	1.62822	1.80583	1.60587	1.12054	1.49189	1.57972	1.42562	1.92802	1.58589	1.29891	1.4788	1.38417	1.3392	1.43964	1.36841	1.61334	1.42334	1.54763	1.54834	1.46118
83	1.41102	1.59665	1.44584	1.49612	1.38583	1.15999	1.49925	1.64528	1.46026	1.68276	1.72969	1.7047	1.57717	1.39638	1.38288	1.65756	1.55551	1.60317	1.64027	1.52991	1.64783	1.48895
84	1.43377	1.4711	1.54016	1.41819	1.41792	1.22301	1.49459	1.53243	1.46199	1.72468	1.3569	1.59187	1.49477	1.36231	1.37089	1.77851	1.41208	1.43361	1.51831	1.61104	1.59168	1.40716
85	1.47744	1.65464	1.36174	1.53015	1.45824	1.09828	1.57159	1.60537	1.56249	1.49707	1.50039	1.82467	1.58661	1.60027	1.49733	1.61656	1.51518	1.74752	1.55189	1.67798	1.45933	1.49905
86	1.43974	1.36117	1.40673	1.86875	1.50843	1.08745	1.60393	1.65774	1.48731	1.3851	1.63512	1.38357	1.70164	2.36672	1.61597	1.69293	1.73245	1.5036	1.44395	1.71621	1.43299	1.4161
87	1.51528	1.78488	1.8726	1.49891	1.59737	1.12436	1.44033	1.44872	1.60011	1.56476	1.28575	1.54337	1.45104	1.37277	1.6409	1.40294	1.39112	1.64893	1.474	1.48052	1.83065	1.42852
88	1.69599	1.43701	1.55726	1.55273	1.62565	1.0038	1.42173	1.42493	1.48319	1.5137	1.71564	1.46471	1.54832	1.38278	1.60989	1.49998	1.4115	1.59137	1.4968	1.48958	1.45324	1.45796
89	1.63187	1.60493	1.57389	1.52055	1.50404	1.21826	1.50407	1.57469	1.51988	1.35801	1.57499	1.41216	1.51744	1.46275	1.78707	1.77826	1.4907	1.71597	1.43464	1.50965	1.5399	1.40464
90	1.42333	1.55614	2.15673	1.50638	1.69239	1.19118	1.4052	1.53429	1.41752	1.6566	1.42304	1.3918	1.61764	1.51192	1.36015	1.54711	1.49261	1.45182	1.60347	1.53874	1.41957	1.39582
91	1.49677	1.5406	1.34588	1.68752	1.57419	1.14861	1.49204	1.53454	1.44781	1.57287	1.42521	1.39866	1.56866	1.40186	1.33773	1.54484	1.62344	1.81986	1.4441	1.49956	1.48214	1.74854
92	1.77832	1.6673	1.50963	1.58115	1.55046	1.09506	1.4016	1.40567	1.51799	1.38627	1.61183	1.49861	1.63297	1.3414	1.41166	1.41301	1.39651	1.37397	1.34105	1.59049	1.71822	1.49061
93	1.62357	1.57872	1.6398	1.59246	1.43351	1.05637	1.44708	1.39827	1.45728	1.70092	1.38074	1.48494	1.69375	1.51888	1.46789	1.532	1.49702	1.4184	1.35183	1.56407	1.60513	1.43278
94	1.53836	1.78938	1.55155	1.40777	1.4474	1.14912	1.49745	1.70516	1.43245	1.65927	1.36515	1.49806	1.63106	1.46353	1.50638	1.61023	1.4531	1.51867	1.60929	1.43901	1.78188	1.54722
95	1.48369	1.53976	1.48612	1.68416	1.40861	1.25555	1.44596	1.51553	1.33369	1.51228	1.55206	1.77054	1.4849	1.50062	1.48363	1.54179	1.48415	1.65521	1.51017	1.47391	1.42787	1.69159
96	1.54969	1.50586	1.51428	1.56773	1.76128	1.14274	1.43295	1.54788	1.69056	1.63757	1.50964	1.37977	1.41823	1.39714	1.55852	1.53513	1.52846	1.73423	1.38805	1.483	1.57898	1.56234
97	1.50231	1.44126	1.7145	1.69076	1.47888	1.21143	1.57503	1.37853	1.43117	1.48205	1.36631	1.50885	1.55889	1.63706	1.56317	1.6563	1.77559	1.57281	1.71389	1.66311	1.39822	1.50738
98	1.53075	1.63234	1.68191	1.44833	1.61634	1.09204	1.39774	1.61411	1.62543	1.74479	1.77151	1.45642	1.69836	1.57005	1.79957	1.33724	1.72446	1.75304	1.57099	1.68137	1.56431	1.4393
99	1.50292	1.66413	1.47626	1.44881	1.47738	1.12689	1.34188	1.35246	1.46658	1.62761	1.42573	1.48876	1.58362	1.50017	1.74537	1.70047	1.54482	1.65586	1.58756	1.639	1.50431	1.59509
100	1.54947	1.64028	1.60966	1.7493	1.34913	1.09776	1.38776	1.47209	1.54727	1.59522	1.51236	1.78088	1.47667	1.35683	1.76923	1.48507	1.64145	1.69489	1.57144	1.47475	1.61125	1.54688
101	1.40368	1.66739	1.40735	1.43462	1.38579	1.13397	1.43572	1.54234	1.63445	1.6485	1.52255	1.47087	1.62909	1.58966	1.48265	1.84524	1.45987		1.59609	1.62732	1.31963	1.5998
102	1.5093	1.59072	1.76211	1.49894	1.5093	1.11943	1.50808	1.47095	1.48239	1.56258	1.33144	1.62628	1.62005	1.61505	1.48433	1.61965			1.59393	1.91426	1.43433	1.73323
103	1.50566	1.59027	1.39543	1.80922	1.45078	1.0921	1.45358	1.54422	1.47757	1.65216	1.19717	1.37594	1.40531	1.69318	1.89123	1.58089			1.68466	1.72722	1.58988	1.57698
104	1.35712	1.46358	1.67956	1.5056	1.49176	0.966253	1.49474	1.47662	1.58131	1.73222	1.61591	1.6308	1.63069	1.53271	1.47112	1.63765			1.43846	1.49777	1.49158	1.57267
105	1.52351	1.60802	1.46131	1.89119	1.4227	1.06153	1.43031	1.61604	1.49154	1.70088	1.5136	1.38066	1.53108	1.54092	1.75394	1.69558			1.8369	1.42704	1.49554	1.42877
106	1.72868	1.49849	1.46331	1.49504	1.62715	1.05154	1.33923	1.268	1.60435	1.5541	1.44203	1.58789	1.49498	1.32771	1.61594	1.51539			1.5307	1.61967	1.36771	1.58733
107		1.58224	1.63874	1.53057	1.52904	1.19679	1.33119	1.47605	1.71071	1.56342	1.40944	1.49002	1.36426	1.50767	1.57739	1.63811			1.42829	1.44296	1.70586	1.52067
108			1.68842	1.76131	1.42818	1.1682	1.44585	1.38078	1.50757	1.54396	1.6586	2.04025	1.68565	1.70577	1.49681	1.67853			1.34117	1.49099	1.45159	1.42182
109			1.50437	1.59817	1.31978	1.27567	1.40139	1.55218		1.4885	1.40363	1.42842	1.43519	1.67669	1.69406	2.00601			1.607	1.62558	1.35022	1.52695
110			1.38602	1.43977	1.56581	1.17458	1.44684	1.42556		1.46278	1.63556	1.55597		1.3741	1.86377	1.59502			1.79286	1.58627	1.54974	1.4144
111			1.4503	1.78654	1.45147	1.1178	1.58756	1.35492			1.45713	1.7773		1.51278	1.63185	1.53293			1.56697	1.66495	1.52405	1.35809
112			1.41242	1.4468	1.39419	1.12213	1.36988				1.85619			1.49616	1.61145	1.59536			1.52791	1.70503	1.71701	1.50765
113			1.60828	1.44299	1.45129	1.05833	1.51223				1.3941			1.34524	1.55547	1.71479			1.40254	1.6783	1.67133	1.57879
114			1.61627	1.52075	1.60997	1.12472	1.41973				1.4751				2.11472	1.6547			1.58758	1.64127	1.28406	1.50115
115			1.60752	1.67084	1.48714	1.27047	1.49006				1.41024				1.39828	1.41995			1.63461	1.69908	1.70026	1.51469
116			1.61368	1.58618	1.41269	1.00202	1.49033				1.48565				1.70727	1.60436			1.54861	1.61603	1.56609	1.45219
117			1.69917	1.55354	1.4239	1.11476					1.35654				1.75314	1.64158			1.61816	1.77394	1.57192	1.4954
118			1.44536	1.52038	1.43296	1.13858					1.68381				1.68438	1.70966			1.63633	1.47698	1.69459
119			1.49096	1.55536	1.40249	1.21454					1.71133				1.59424	1.50212			1.3269	1.48844	1.42545
120			1.66718	1.71913	1.5915	1.15046					1.44195				1.47138	1.47591			1.60011	1.47822	1.5522
121			1.63693	1.82955	1.56388	1.05686					1.43611				1.6584	1.50107			1.70268	1.75517	1.51397
122			1.89379	1.51989		1.16712									1.38335	1.40167			1.62796	1.44669
123			1.76585	1.57854		1.14354									1.60536	1.50812			1.57517	1.75662
124			1.5386	1.67367		1.17493									1.49568	1.65215			1.5586	1.88998
125			1.40513	1.41841		1.20265									1.3815	2.0648			1.57383	1.55426
126			1.82941	1.44797		1.32066									1.65148	1.89769			1.78835	1.68172
127			1.38054	1.43603		1.15945									1.6136	1.51978			1.5789	1.65893
128			1.57698	1.4093		1.09077									1.58494	1.67967			1.64984	1.6078
129			1.58548	1.46663		1.08415									1.41786	1.65174			1.49798	1.58541
130			2.20693	1.51114		1.16144									1.60405	1.42814			1.6747	1.75717
131			1.56476	1.52282		1.09981									1.58253	1.55772			1.58219	1.45025
132			1.76753	1.48118		1.18165									1.55289	1.63516			1.48955	1.51579
133			1.6126	1.8405		1.16247									1.46129	1.51444			1.54207	1.35656
134			1.79968	1.79113		1.1515									1.57543	1.86484			1.70424	1.59605
135			1.4764	1.6088		1.09307									1.62765	1.56758				1.52004
136			1.44885	1.47266											1.9264	1.46031				1.43181
137			1.53298	1.45493											1.50546	1.51189				1.68426
138			1.5852	1.57969											1.89496	1.48089				1.58732
139				1.52529											1.48612	1.36043				1.54586
140				1.58001											1.51214	1.47698				1.6435
141				1.33945											1.39284	1.47991
142				1.54788											1.6548	1.52816
143				1.62679											1.31954	1.70598
144				1.48691											1.62066	1.65309
145				1.66676											1.72913	1.54443
146				1.511											1.52544	1.37041
147				1.44833											1.6303	1.63606
148				1.50963											1.6198	1.43235
149				1.46345											1.5136	1.47532
150				1.6035											1.49776	1.46409
151				1.45362											1.42542	1.45337
152				2.04347											1.5431	1.46292
153				1.59087											1.59212	1.65172
154				1.78162											1.55913	1.44936
155				1.58324											1.49328	1.39421
156				1.55144											1.39899	1.57358
157				1.57259											1.49478	1.52926
158				1.40113											1.42086	1.5845
159				1.53381											1.51701	1.43436
160				1.55877											1.54404	1.6152
161				1.52687											1.43994	1.52111
162				1.41709											1.48287
															1.45436
