# Supplementary material for: Kap-β2/Transportin mediates β-catenin nuclear transport in Wnt signaling
Source: eLife. 2022 Oct 27;11:e70495. doi: 10.7554/eLife.70495 (PMC9665845; doi:10.7554/eLife.70495)
Supplement: Figure 4—source data 1. [file elife-70495-fig4-data1.xlsx]

## Sheet: Figure 4B MBPx3 GFP
	area	Min	Max	IntDen	RawIntDen	Raw N/C
1	2.035	110	149	263.141	10215	0.785709
2	2.035	143	180	334.909	13001
3	2.035	140	172	315.924	12264	0.765113
4	2.035	175	241	412.911	16029
5	2.035	132	177	312.884	12146	0.570503
6	2.035	232	303	548.436	21290
7	2.035	99	135	228.03	8852	0.782809
8	2.035	132	158	291.297	11308
9	2.035	116	145	259.38	10069	0.746737
10	2.035	143	199	347.351	13484
11	2.035	113	148	261.75	10161	0.757379
12	2.035	152	196	345.6	13416
13	2.035	106	129	237.973	9238	0.781623
14	2.035	131	170	304.46	11819
15	2.035	109	147	260.153	10099	0.645923
16	2.035	171	226	402.762	15635
17	2.035	103	134	238.669	9265	0.748566
18	2.035	142	176	318.835	12377
19	2.035	101	136	246.216	9558	0.458417
20	2.035	244	296	537.101	20850
21	2.035	117	152	274.785	10667	0.612729
22	2.035	178	255	448.46	17409
23	2.035	104	131	238.746	9268	0.694128
24	2.035	148	189	343.951	13352
25	2.035	108	143	263.012	10210	0.683263
26	2.035	166	213	384.935	14943
27	2.035	106	127	235.526	9143	0.730972
28	2.035	141	178	322.209	12508
29	2.035	120	152	276.742	10743	0.675321
30	2.035	178	233	409.794	15908
31	2.035	117	143	265.82	10319	0.757024
32	2.035	150	205	351.138	13631
33	2.035	136	175	314.558	12211	0.641975
34	2.035	209	267	489.986	19021
35	2.035	122	162	283.389	11001	0.715326
36	2.035	158	221	396.167	15379
37	2.035	100	123	224.423	8712	0.776125
38	2.035	121	164	289.159	11225
39	2.035	97	128	223.496	8676	0.701771
40	2.035	141	177	318.474	12363
41	2.035	116	154	272.363	10573	0.702012
42	2.035	165	217	387.975	15061
43	2.035	133	162	296.346	11504	0.761048
44	2.035	173	228	389.392	15116
45	2.035	144	196	349.412	13564	0.642083
46	2.035	236	290	544.185	21125
47	2.035	115	142	261.621	10156	0.784368
48	2.035	132	192	333.544	12948
49	2.035	106	138	249.05	9668	0.617172
50	2.035	174	228	403.534	15665
51	2.035	122	163	281.56	10930	0.709234
52	2.035	178	218	396.991	15411
53	2.035	170	216	388.181	15069	0.710701
54	2.035	239	314	546.195	21203
55	2.035	130	166	288.953	11217	0.394354
56	2.035	308	411	732.725	28444
57	2.035	129	155	284.934	11061	0.72384
58	2.035	173	219	393.642	15281
59	2.035	98	132	223.187	8664	0.636544
60	2.035	150	195	350.623	13611
61	2.035	113	150	257.809	10008	0.681512
62	2.035	156	208	378.289	14685
63	2.035	96	131	224.629	8720	0.689819
64	2.035	131	180	325.635	12641
65	2.035	113	155	268.576	10426	0.579899
66	2.035	192	249	463.144	17979
67	2.035	153	215	373.498	14499	0.539518
68	2.035	297	377	692.281	26874
69	2.035	111	137	257.293	9988	0.689255
70	2.035	164	203	373.292	14491
71	2.035	101	127	232.177	9013	0.738892
72	2.035	134	171	314.224	12198
73	2.035	93	129	223.625	8681	0.706462
74	2.035	140	172	316.542	12288
75	2.035	123	158	278.906	10827	0.717495
76	2.035	159	216	388.722	15090
77	2.035	116	149	271.152	10526	0.756939
78	2.035	154	199	358.222	13906
79	2.035	99	121	218.112	8467	0.794352
80	2.035	123	146	274.579	10659
81	2.035	100	127	231.816	8999	0.548619
82	2.035	185	234	422.545	16403
83	2.035	105	134	247.17	9595	0.687321
84	2.035	144	201	359.613	13960
85	2.035	117	146	269.117	10447	0.724631
86	2.035	167	203	371.386	14417
87	2.035	113	154	258.478	10034	0.592431
88	2.035	189	237	436.301	16937
89	2.035	128	155	281.997	10947	0.768696
90	2.035	163	203	366.852	14241
91	2.035	97	121	221.023	8580	0.722892
92	2.035	131	164	305.748	11869
93	2.035	106	134	239.313	9290	0.794628
94	2.035	134	168	301.163	11691
95	2.035	95	123	221.461	8597	0.799944
96	2.035	122	150	276.845	10747
97	2.035	117	150	268.37	10418	0.624693
98	2.035	191	234	429.604	16677
99	2.035	119	147	269.787	10473	0.753562
100	2.035	156	199	358.016	13898
101	2.035	92	120	217.597	8447	0.799073
102	2.035	117	159	272.312	10571
103	2.035	82	115	203.532	7901	0.435629
104	2.035	187	258	467.214	18137
105	2.035	103	137	236.994	9200	0.726526
106	2.035	143	190	326.202	12663
107	2.035	100	137	241.116	9360	0.699134
108	2.035	142	200	344.878	13388
109	2.035	110	130	243.228	9442	0.799289
110	2.035	127	167	304.306	11813
111	2.035	132	171	310.643	12059	0.624075
112	2.035	224	271	497.765	19323
113	2.035	93	124	222.723	8646	0.63211
114	2.035	150	201	352.349	13678
115	2.035	101	138	234.393	9099	0.585823
116	2.035	176	217	400.108	15532
117	2.035	117	156	274.321	10649	0.633191
118	2.035	176	238	433.236	16818
119	2.035	101	137	241.271	9366	0.660974
120	2.035	159	199	365.023	14170
121	2.035	94	126	222.131	8623	0.670842
122	2.035	138	187	331.122	12854
123	2.035	99	125	225.583	8757	0.745975
124	2.035	137	164	302.4	11739
125	2.035	103	139	239.879	9312	0.638815
126	2.035	167	217	375.507	14577
127	2.035	131	170	300.854	11679	0.687162
128	2.035	184	244	437.821	16996
129	2.035	111	146	264.043	10250	0.526019
130	2.035	207	299	501.964	19486
131	2.035	115	155	274.733	10665	0.686957
132	2.035	180	220	399.928	15525
133	2.035	110	152	265.124	10292	0.692877
134	2.035	155	225	382.643	14854
135	2.035	105	134	237.252	9210	0.699742
136	2.035	148	191	339.056	13162
137	2.035	139	186	314.198	12197	0.651549
138	2.035	206	264	482.232	18720
139	2.035	119	143	263.708	10237	0.73584
140	2.035	155	201	358.377	13912

## Sheet: Figure 4B 665-703-MBPx3 GFP
	area	Min	Max	IntDen	RawIntDen	Raw N/C
1	1.34	237	285	347.119	13475	0.966088
2	1.34	211	326	359.304	13948
3	1.34	189	239	289.957	11256	0.964194
4	1.34	198	260	300.725	11674
5	1.34	186	228	274.63	10661	0.959154
6	1.34	182	253	286.325	11115
7	1.34	165	211	248.947	9664	0.959492
8	1.34	176	225	259.457	10072
9	1.34	259	322	386.739	15013	1.21799
10	1.34	186	284	317.521	12326
11	1.34	206	253	305.001	11840	0.953916
12	1.34	211	282	319.736	12412
13	1.34	285	331	408.12	15843	1.05705
14	1.34	251	335	386.095	14988
15	1.34	232	297	354.487	13761	1.03218
16	1.34	216	294	343.436	13332
17	1.34	276	353	424.735	16488	0.792121
18	1.34	356	443	536.2	20815
19	1.34	284	372	434.885	16882	1.07536
20	1.34	264	361	404.41	15699
21	1.34	236	303	365.332	14182	0.97317
22	1.34	248	315	375.404	14573
23	1.34	372	458	552.145	21434	0.928441
24	1.34	367	527	594.701	23086
25	1.34	211	270	321.153	12467	1.06383
26	1.34	192	256	301.884	11719
27	1.34	266	312	387.769	15053	0.95989
28	1.34	266	339	403.972	15682
29	1.34	258	312	377.516	14655	1.06628
30	1.34	211	321	354.049	13744
31	1.34	165	212	255.825	9931	1.21184
32	1.34	137	178	211.105	8195
33	1.34	190	236	281.431	10925	0.91853
34	1.34	204	247	306.392	11894
35	1.34	209	277	328.907	12768	0.749384
36	1.34	297	363	438.903	17038
37	1.34	248	296	371.875	14436	0.995518
38	1.34	245	314	373.549	14501
39	1.34	174	228	271.899	10555	1.0948
40	1.34	149	231	248.355	9641
41	1.34	219	264	318.706	12372	0.993256
42	1.34	215	270	320.87	12456
43	1.34	210	276	324.141	12583	1.03385
44	1.34	198	266	313.528	12171
45	1.34	375	469	575.999	22360	1.52275
46	1.34	228	354	378.264	14684
47	1.34	228	275	344.234	13363	0.97533
48	1.34	234	287	352.941	13701
49	1.34	200	255	303.404	11778	0.897508
50	1.34	202	297	338.052	13123
51	1.34	195	248	301.421	11701	0.837101
52	1.34	200	317	360.077	13978
53	1.34	219	285	341.143	13243	0.806516
54	1.34	213	355	422.983	16420
55	1.34	202	252	296.629	11515	0.878471
56	1.34	230	269	337.665	13108
57	1.34	220	279	333.029	12928	1.12281
58	1.34	191	251	296.604	11514
59	1.34	183	237	283.646	11011	1.07111
60	1.34	165	244	264.815	10280
61	1.34	255	315	373.807	14511	0.974678
62	1.34	227	335	383.519	14888
63	1.34	340	397	492.304	19111	0.835563
64	1.34	372	499	589.188	22872
65	1.34	283	360	428.882	16649	0.981605
66	1.34	286	388	436.92	16961
67	1.34	210	268	322.518	12520	0.997053
68	1.34	209	286	323.471	12557
69	1.34	198	234	290.962	11295	0.922191
70	1.34	167	270	315.512	12248
71	1.34	261	335	401.654	15592	0.858354
72	1.34	301	389	467.935	18165
73	1.34	258	320	402.427	15622	1.00761
74	1.34	254	336	399.387	15504
75	1.34	313	384	456.42	17718	0.937808
76	1.34	265	459	486.688	18893
77	1.34	244	287	351.37	13640	1.01898
78	1.34	184	319	344.827	13386
79	1.34	251	312	380.144	14757	1.01702
80	1.34	238	327	373.781	14510
81	1.34	321	377	475.277	18450	0.836204
82	1.34	390	479	568.374	22064
83	1.34	408	506	597.586	23198	1.08529
84	1.34	367	467	550.625	21375
85	1.34	347	443	520.718	20214	1.16139
86	1.34	272	397	448.357	17405
87	1.34	502	585	713.301	27690	1.22425
88	1.34	364	485	582.645	22618
89	1.34	252	309	378.186	14681	0.955919
90	1.34	265	315	395.626	15358
91	1.34	243	283	355.054	13783	1.01615
92	1.34	224	286	349.412	13564
93	1.34	254	322	396.45	15390	1.16644
94	1.34	217	290	339.881	13194
95	1.34	226	274	334.42	12982	0.998308
96	1.34	198	299	334.986	13004
97	1.34	226	300	367.47	14265	0.982912
98	1.34	225	333	373.859	14513
99	1.34	236	310	369.35	14338	0.982795
100	1.34	244	304	375.816	14589
101	1.34	279	335	412.808	16025	1.10754
102	1.34	240	316	372.725	14469
103	1.34	233	285	355.878	13815	1.01365
104	1.34	235	286	351.086	13629
105	1.34	260	324	391.968	15216	1.0972
106	1.34	243	295	357.243	13868
107	1.34	245	281	350.52	13607	1.07958
108	1.34	200	309	324.682	12604

## Sheet: Figure 4B 665-703 (AA)-MBPx3GFP
	area	Min	Max	IntDen	RawIntDen	Raw N/C
1	0.29	124	169	41.822	9960	0.643369
2	0.29	178	257	65.005	15481
3	0.29	112	144	36.368	8661	0.756353
4	0.29	145	194	48.083	11451
5	0.29	89	172	39.345	9370	0.595526
6	0.29	195	262	66.068	15734
7	0.29	108	142	35.725	8508	0.702734
8	0.29	153	201	50.838	12107
9	0.29	88	123	30.065	7160	0.808674
10	0.29	105	148	37.178	8854
11	0.29	98	132	33.219	7911	0.892688
12	0.29	113	143	37.212	8862
13	0.29	106	156	36.213	8624	0.537421
14	0.29	210	282	67.382	16047
15	0.29	100	139	34.823	8293	0.661482
16	0.29	159	212	52.643	12537
17	0.29	111	141	35.515	8458	0.683751
18	0.29	149	200	51.942	12370
19	0.29	104	144	36.07	8590	0.645525
20	0.29	172	216	55.877	13307
21	0.29	111	155	38.01	9052	0.483754
22	0.29	205	351	78.572	18712
23	0.29	103	162	36.947	8799	0.535186
24	0.29	211	265	69.036	16441
25	0.29	109	144	36.145	8608	0.748001
26	0.29	142	191	48.323	11508
27	0.29	109	145	36.406	8670	0.596081
28	0.29	179	250	61.075	14545
29	0.29	103	139	34.378	8187	0.614409
30	0.29	165	221	55.952	13325
31	0.29	115	152	38.11	9076	0.589121
32	0.29	194	271	64.69	15406
33	0.29	106	147	35.297	8406	0.676975
34	0.29	149	207	52.139	12417
35	0.29	115	154	38.325	9127	0.5758
36	0.29	192	279	66.559	15851
37	0.29	104	140	35.801	8526	0.698051
38	0.29	160	205	51.287	12214
39	0.29	112	145	36.998	8811	0.624584
40	0.29	164	240	59.236	14107
41	0.29	106	132	34.117	8125	0.697964
42	0.29	147	202	48.881	11641
43	0.29	132	183	45.434	10820	0.497975
44	0.29	275	349	91.237	21728
45	0.29	120	154	39.689	9452	0.524965
46	0.29	213	302	75.604	18005
47	0.29	159	228	55.125	13128	0.66156
48	0.29	239	336	83.326	19844
49	0.29	120	154	39.689	9452	0.521922
50	0.29	228	302	76.045	18110
51	0.29	113	162	40.055	9539	0.577247
52	0.29	181	297	69.389	16525
53	0.29	146	210	50.2	11955	0.500754
54	0.29	260	428	100.248	23874
55	0.29	111	151	37.707	8980	0.637875
56	0.29	165	244	59.114	14078
57	0.29	119	173	41.961	9993	0.485286
58	0.29	258	339	86.467	20592
59	0.29	111	139	35.91	8552	0.612344
60	0.29	166	249	58.644	13966
61	0.29	114	157	37.695	8977	0.569245
62	0.29	164	288	66.219	15770
63	0.29	115	160	40.273	9591	0.608991
64	0.29	203	254	66.131	15749
65	0.29	129	185	47.332	11272	0.544199
66	0.29	245	367	86.975	20713
67	0.29	109	149	36.637	8725	0.588851
68	0.29	161	266	62.217	14817
69	0.29	116	176	38.963	9279	0.649744
70	0.29	178	250	59.966	14281
71	0.29	106	134	34.386	8189	0.770875
72	0.29	137	174	44.606	10623
73	0.29	93	130	32.215	7672	0.853868
74	0.29	117	151	37.728	8985
75	0.29	111	168	37.959	9040	0.67761
76	0.29	160	229	56.019	13341
77	0.29	122	166	42.645	10156	0.504345
78	0.29	262	325	84.556	20137
79	0.29	103	140	35.415	8434	0.585572
80	0.29	183	238	60.479	14403
81	0.29	108	155	37.783	8998	0.668897
82	0.29	156	232	56.485	13452
83	0.29	107	146	36.355	8658	0.659356
84	0.29	155	237	55.138	13131
85	0.29	107	148	35.977	8568	0.768155
86	0.29	138	177	46.836	11154
87	0.29	96	144	34.34	8178	0.729853
88	0.29	134	187	47.05	11205
89	0.29	116	144	37.947	9037	0.583032
90	0.29	179	279	65.085	15500
91	0.29	111	155	38.728	9223	0.656722
92	0.29	178	236	58.971	14044
93	0.29	106	148	36.187	8618	0.661905
94	0.29	166	226	54.672	13020
95	0.29	122	166	41.843	9965	0.531608
96	0.29	239	322	78.711	18745
97	0.29	103	131	33.538	7987	0.763722
98	0.29	134	174	43.914	10458
99	0.29	114	152	38.829	9247	0.719051
100	0.29	163	214	54	12860
101	0.29	106	150	36.401	8669	0.663935
102	0.29	159	228	54.827	13057
103	0.29	107	139	35.352	8419	0.780621
104	0.29	132	180	45.287	10785
105	0.29	104	141	35.175	8377	0.704245
106	0.29	153	189	49.948	11895
107	0.29	107	147	36.46	8683	0.580997
108	0.29	168	263	62.755	14945
109	0.29	104	143	35.604	8479	0.651029
110	0.29	158	226	54.688	13024
111	0.29	102	132	34.004	8098	0.784234
112	0.29	131	167	43.359	10326
113	0.29	115	167	39.903	9503	0.574825
114	0.29	200	280	69.419	16532
115	0.29	136	198	47.978	11426	0.516499
116	0.29	272	382	92.891	22122
117	0.29	90	139	33.559	7992	0.701483
118	0.29	148	181	47.84	11393
119	0.29	121	169	40.311	9600	0.526778
120	0.29	213	291	76.523	18224
121	0.29	100	131	33.836	8058	0.788223
122	0.29	132	164	42.927	10223
123	0.29	99	126	32.95	7847	0.733845
124	0.29	139	170	44.9	10693
125	0.29	114	158	38.614	9196	0.479608
126	0.29	244	305	80.512	19174
127	0.29	111	160	38.043	9060	0.644565
128	0.29	166	235	59.022	14056
129	0.29	108	141	35.574	8472	0.793407
130	0.29	123	189	44.837	10678
131	0.29	93	140	32.711	7790	0.612373
132	0.29	160	210	53.416	12721
133	0.29	116	161	38.316	9125	0.499234
134	0.29	210	314	76.75	18278
135	0.29	99	128	33.265	7922	0.822125
136	0.29	114	162	40.462	9636

## Sheet: Figure 4C GFP
	area	Min	Max	IntDen	RawIntDen	Raw N/C
1	16.478	2158	3127	42312.4	400591	1.58801
2	16.478	1092	2145	26645	252260
3	16.478	2580	3584	50269.6	475925	1.93014
4	16.478	1114	2162	26044.5	246575
5	16.478	2304	3569	45315	429018	1.40719
6	16.478	1245	2671	32202.5	304876
7	16.478	2659	3822	50893.6	481833	1.3069
8	16.478	1191	3359	38942.4	368685
9	16.478	2975	4144	59070.1	559244	0.812582
10	16.478	2479	6362	72694.4	688231
11	16.478	2369	3696	51552.3	488069	2.02086
12	16.478	1029	3698	25510	241515
13	16.478	3610	4596	66421.4	628842	1.09453
14	16.478	2559	5286	60684.7	574530
15	16.478	1461	3867	52062.2	492897	1.30029
16	16.478	1101	5167	40038.8	379066
17	16.478	1954	3219	42046.7	398075	1.56153
18	16.478	978	2542	26926.6	254926
19	16.478	3126	5297	67994.3	643733	2.70884
20	16.478	862	3024	25100.9	237642
21	16.478	1261	2419	29177.2	276234	1.51025
22	16.478	683	1707	19319.4	182906
23	16.478	1620	3713	46266.1	438022	1.10083
24	16.478	997	4335	42028.3	397901
25	16.478	2839	4525	62991.9	596373	1.48221
26	16.478	1417	5035	42498.6	402354
27	16.478	3407	5225	71725.7	679060	1.20508
28	16.478	1835	4773	59519.7	563500
29	16.478	3752	5448	73366.4	694593	1.20864
30	16.478	1835	6719	60701.6	574690
31	16.478	2458	4185	55235.5	522940	1.68616
32	16.478	751	3543	32758.1	310136
33	16.478	1978	4676	51942.9	491767	1.65126
34	16.478	1187	5311	31456.6	297814
35	16.478	2959	5436	70682.2	669181	1.88313
36	16.478	1372	3613	37534.5	355356
37	16.478	2095	5572	68549.3	648987	1.43423
38	16.478	751	7619	47795.1	452498
39	16.478	603	1259	15167.9	143601	1.12262
40	16.478	452	1128	13511.1	127916
41	16.478	568	1558	17234.4	163166	1.22271
42	16.478	448	1188	14095.2	133446
43	16.478	798	1459	17925.5	169709	0.955316
44	16.478	715	1647	18764	177647
45	16.478	755	1408	17818.4	168695	1.46133
46	16.478	398	1147	12193.2	115439
47	16.478	800	1627	20829.9	197206	1.41306
48	16.478	542	1337	14741	139560
49	16.478	1032	1839	24222.7	229327	1.72219
50	16.478	248	1303	14065	133160
51	16.478	806	1619	19706.4	186569	1.39826
52	16.478	517	1172	14093.4	133429
53	16.478	590	1388	16788.6	158945	1.15699
54	16.478	349	1876	14510.6	137378
55	16.478	876	1762	22491.9	212941	1.00416
56	16.478	658	2024	22398.7	212059
57	16.478	968	1674	22160.1	209800	1.70169
58	16.478	487	1130	13022.4	123289
59	16.478	795	1972	22981.9	217580	1.7323
60	16.478	366	1319	13266.7	125602
61	16.478	2301	3361	48121.4	455587	1.38334
62	16.478	1463	2800	34786.4	329339
63	16.478	2457	3623	51156.5	484322	2.04621
64	16.478	1014	2181	25000.6	236692
65	16.478	2060	3166	41491.1	392815	1.39511
66	16.478	1373	2280	29740.3	281565
67	16.478	1196	2856	35798.6	338922	1.16611
68	16.478	1081	2354	30699.3	290644
69	16.478	1043	4402	37655	356497	1.56139
70	16.478	1001	2055	24116.4	228321
71	16.478	1743	2444	34480.1	326439	1.72848
72	16.478	322	1756	19948.2	188859
73	16.478	1777	2988	38142.6	361113	2.14452
74	16.478	444	1566	17786.1	168389
75	16.478	1792	2617	36502.6	345587	1.30426
76	16.478	411	2545	27987.1	264967
77	16.478	1436	2995	39757.4	376401	1.46253
78	16.478	860	2632	27184	257363
79	16.478	1940	2791	38567.7	365138	1.75195
80	16.478	799	1961	22014.2	208418
81	16.478	1837	3016	37989.2	359661	2.0881
82	16.478	710	1512	18193.2	172243
83	16.478	1901	2697	37097.2	351216	1.12277
84	16.478	1248	2835	33040.9	312813
85	16.478	1787	2807	37646.3	356415	1.27249
86	16.478	1254	2736	29584.8	280093
87	16.478	775	1670	21481.8	203378	1.14695
88	16.478	550	1793	18729.4	177320
89	16.478	1224	1953	26087.5	246982	1.50804
90	16.478	635	1469	17298.9	163777
91	16.478	957	1739	21964.9	207952	1.42553
92	16.478	621	1381	15408.3	145877
93	16.478	929	1863	23037.3	218105	1.41249
94	16.478	558	1783	16309.8	154412
95	16.478	929	1815	23242.6	220048	1.3776
96	16.478	657	1568	16871.8	159733
97	16.478	880	1652	20319.6	192375	1.58314
98	16.478	310	1195	12835	121515
99	16.478	936	1790	23151.4	219185	1.59498
100	16.478	432	1323	14515.2	137422
101	16.478	1044	1634	22541	213406	1.07228
102	16.478	880	1812	21021.6	199021
103	16.478	1289	2094	27013.4	255748	1.93904
104	16.478	300	1389	13931.3	131894
105	16.478	1330	1994	27429.9	259691	1.09507
106	16.478	1100	1987	25048.4	237145
107	16.478	876	1620	20612.7	195150	1.34297
108	16.478	527	1348	15348.6	145312

## Sheet: Figure 4C hBcat-665-782
	area	Min	Max	IntDen	RawIntDen	Raw N/C
1	16.478	2575	3873	52552.2	497536	1.82359
2	16.478	986	2660	28818	272833
3	16.478	3714	6719	86440.2	818369	2.19027
4	16.478	1279	3259	39465.6	373639
5	16.478	3530	5887	71611.7	677981	1.71983
6	16.478	1181	3675	41639	394215
7	16.478	5013	10503	137626	1302968	3.03238
8	16.478	49	5188	45385.5	429685
9	16.478	3602	6388	86728.1	821094	3.91833
10	16.478	932	2123	22133.9	209552
11	16.478	4993	7675	104250	986982	2.07619
12	16.478	1121	4933	50212.2	475382
13	16.478	6068	8506	121123	1146726	2.39664
14	16.478	1463	5113	50538.6	478472
15	16.478	3748	5586	78504.9	743242	2.35676
16	16.478	1197	2693	33310.5	315366
17	16.478	3989	5984	82140.4	777661	1.44621
18	16.478	1531	5102	56797.2	537725
19	16.478	2365	4654	55639.1	526761	2.72412
20	16.478	764	1763	20424.6	193369
21	16.478	4016	6343	86403.6	818022	2.9125
22	16.478	373	3397	29666.5	280866
23	16.478	5553	8458	114405	1083124	3.35303
24	16.478	1248	3059	34119.8	323028
25	16.478	5320	7790	105558	999367	1.32898
26	16.478	2672	6815	79428.1	751982
27	16.478	1999	3449	43325.4	410181	2.95224
28	16.478	476	1314	14675.4	138939
29	16.478	6239	8876	121111	1146617	2.32558
30	16.478	1840	4234	52077.9	493045
31	16.478	2494	4903	61092.3	578389	1.60323
32	16.478	1034	3418	38105.8	360765
33	16.478	3297	4628	66561.3	630166	2.00985
34	16.478	879	3679	33117.6	313539
35	16.478	2961	5627	68863.8	651965	4.95493
36	16.478	279	2092	13898	131579
37	16.478	2713	4162	55959.7	529796	3.07837
38	16.478	779	1526	18178.4	172103
39	16.478	4728	7415	102363	969119	3.1019
40	16.478	1339	3224	33000.2	312428
41	16.478	4921	7853	103782	982556	2.30618
42	16.478	880	4572	45001.8	426053
43	16.478	3945	5429	74251.9	702977	1.62687
44	16.478	1650	3967	45641.1	432105
45	16.478	5335	10173	127619	1208226	2.43034
46	16.478	1094	4647	52510.6	497142
47	16.478	1354	4222	53649.3	507922	2.62321
48	16.478	233	2252	20451.7	193626
49	16.478	2607	4196	53918.3	510469	2.47095
50	16.478	556	1997	21820.9	206588
51	16.478	1538	2343	32922	311688	1.82792
52	16.478	561	1596	18010.6	170515
53	16.478	8084	17939	239158	2264216	2.33875
54	16.478	2265	10399	102259	968129
55	16.478	7263	17843	240471	2276646	1.72965
56	16.478	3972	12026	139028	1316245
57	16.478	4609	14547	172996	1637834	1.97206
58	16.478	1209	9026	87723.6	830519
59	16.478	3244	5213	71156.6	673672	1.96426
60	16.478	761	4214	36225.6	342964
61	16.478	4699	7301	100056	947280	3.73452
62	16.478	628	2873	26792.3	253655
63	16.478	3092	5009	68025.1	644025	3.05322
64	16.478	460	2669	22279.8	210933
65	16.478	3105	7245	95114.4	900491	1.99286
66	16.478	1755	3702	47727.5	451858
67	16.478	1561	3381	45956.4	435090	1.56679
68	16.478	1377	2452	29331.5	277695
69	16.478	3027	4490	61715	584284	1.52466
70	16.478	1682	3710	40477.9	383223
71	16.478	1097	3195	40145.7	380078	1.7365
72	16.478	836	2018	23118.8	218876
73	16.478	6415	11205	149714	1417410	2.39906
74	16.478	837	6253	62405.4	590820
75	16.478	1121	2090	26491	250802	3.32056
76	16.478	157	1029	7977.86	75530
77	16.478	1108	2113	27843.9	263611	4.56493
78	16.478	95	807	6099.53	57747
79	16.478	635	1234	15047.3	142460	2.60897
80	16.478	99	659	5767.55	54604
81	16.478	2702	5034	69784.3	660680	1.52233
82	16.478	497	4049	45840.5	433993
83	16.478	6132	8834	122246	1157359	2.50824
84	16.478	240	5686	48737.8	461423
85	16.478	1072	2049	25605.1	242415	1.83573
86	16.478	445	1376	13948.2	132054
87	16.478	656	1201	15100.1	142960	1.38091
88	16.478	227	1022	10934.9	103526
89	16.478	1090	2168	25834.6	244588	1.76055
90	16.478	483	1489	14674.2	138927
91	16.478	2603	6727	74955.1	709634	5.8951
92	16.478	467	1145	12714.8	120377
93	16.478	1174	2018	27590.7	261214	2.48716
94	16.478	173	954	11093.3	105025
95	16.478	12276	20211	330573	3129686	2.97841
96	16.478	3528	10524	110990	1050792
97	16.478	6961	9938	140623	1331343	1.25974
98	16.478	3796	8853	111628	1056836
99	16.478	20211	20211	333027	3152916	3.42787
100	16.478	3876	8592	97152.8	919790

## Sheet: Figure 4C hBcat-665-782 (AA)
	area	Min	Max	IntDen	RawIntDen	Raw N/C
1	16.478	1597	2461	33792.6	319930	1.3921
2	16.478	1116	1784	24274.5	229818
3	16.478	1390	2351	30415.4	287956	1.56256
4	16.478	637	2546	19465.1	184285
5	16.478	2295	3503	46238.6	437762	1.32296
6	16.478	1318	3826	34950.8	330895
7	16.478	1791	3113	40701.3	385338	1.60665
8	16.478	872	2235	25333.1	239840
9	16.478	1367	2402	31219.3	295567	1.48276
10	16.478	733	1748	21054.9	199336
11	16.478	1056	2373	32015.4	303104	1.5914
12	16.478	701	2120	20117.8	190464
13	16.478	1360	2419	32169.5	304563	1.55917
14	16.478	799	1834	20632.4	195336
15	16.478	1626	2647	34920	330604	1.71883
16	16.478	891	1588	20316.2	192343
17	16.478	1504	2396	32013	303082	1.36981
18	16.478	954	2088	23370.4	221258
19	16.478	1366	2412	29672.3	280921	1.70531
20	16.478	665	1366	17399.9	164733
21	16.478	1278	2151	29112.8	275624	1.5615
22	16.478	631	1708	18644.1	176512
23	16.478	1601	2521	34614.8	327714	1.86549
24	16.478	862	1450	18555.4	175672
25	16.478	1497	2466	32159.4	304468	1.43778
26	16.478	897	2437	22367.5	211763
27	16.478	2815	4441	59504.8	563359	1.47315
28	16.478	1614	3536	40393	382419
29	16.478	1319	2427	31497.3	298199	1.41205
30	16.478	885	1835	22306	211181
31	16.478	1376	2292	30262.6	286510	1.5908
32	16.478	761	1563	19023.5	180104
33	16.478	1347	2443	31295.5	296289	2.0997
34	16.478	456	1233	14904.7	141110
35	16.478	2204	3287	45147.5	427432	1.44761
36	16.478	1246	3220	31187.7	295268
37	16.478	1360	2134	29089.4	275403	1.47936
38	16.478	768	1591	19663.5	186163
39	16.478	1160	2205	29966.3	283705	1.59275
40	16.478	708	1988	18814.2	178123
41	16.478	1445	2231	29960	283645	1.53228
42	16.478	676	1657	19552.6	185113
43	16.478	1368	2583	35337.4	334555	1.56255
44	16.478	879	1940	22615.3	214109
45	16.478	1649	2785	34455.1	326202	1.36171
46	16.478	860	2009	25302.9	239554
47	16.478	1808	2797	37338.1	353497	1.71976
48	16.478	928	1793	21711.2	205550
49	16.478	1529	2361	32847.8	310985	1.47612
50	16.478	800	2124	22252.8	210677
51	16.478	1734	2694	37732.4	357230	1.33386
52	16.478	917	2882	28288.1	267816
53	16.478	1699	2549	33780.8	319818	1.5054
54	16.478	593	2015	22439.7	212447
55	16.478	1457	2219	29231.9	276752	1.46888
56	16.478	641	1937	19900.8	188410
57	16.478	1572	2332	31563.9	298830	1.32578
58	16.478	1081	1816	23807.8	225399
59	16.478	1367	2169	29475	279053	1.35221
60	16.478	797	2834	21797.6	206368
61	16.478	1756	3228	38784.9	367194	2.4421
62	16.478	310	1510	15881.8	150360
63	16.478	1930	3002	38222.5	361870	1.472
64	16.478	850	2676	25966.4	245836
65	16.478	2162	3121	42390.4	401329	1.3289
66	16.478	1209	3336	31898.8	302000
67	16.478	918	2957	35547.7	336546	1.57586
68	16.478	736	1975	22557.6	213563
69	16.478	1288	2210	30592.6	289634	1.58287
70	16.478	741	1581	19327.3	182980
71	16.478	1630	2528	32857.3	311075	1.5188
72	16.478	705	1764	21633.7	204816
73	16.478	1182	2180	26966.4	255303	1.6747
74	16.478	638	1289	16102.2	152447
75	16.478	1795	2775	36961.5	349931	1.52601
76	16.478	1054	2674	24221	229311
77	16.478	1425	2345	31272.4	296070	1.34144
78	16.478	891	1880	23312.6	220711
79	16.478	1368	2206	30283.6	286709	1.3464
80	16.478	908	1923	22492.3	212945
81	16.478	1496	2423	32109.7	303997	1.43437
82	16.478	917	1899	22386	211938
83	16.478	1697	2738	35952.8	340382	1.46877
84	16.478	863	1959	24478.2	231746
85	16.478	1416	2212	29908.2	283155	1.51383
86	16.478	730	1595	19756.7	187046
87	16.478	1304	2116	27892.4	264070	1.19548
88	16.478	324	1994	23331.5	220890
89	16.478	1340	2607	31442.2	297678	1.43605
90	16.478	484	1887	21895	207290
91	16.478	1388	3322	32153	304407	1.67983
92	16.478	654	1683	19140.6	181213
93	16.478	1466	2166	30504.9	288804	1.61445
94	16.478	779	1812	18894.9	178887
95	16.478	1175	2489	28860.8	273238	1.13392
96	16.478	1051	2178	25452.1	240967
97	16.478	1804	2688	36492.1	345487	1.29065
98	16.478	1215	2532	28274.1	267684
99	16.478	2432	3603	50384.7	477015	1.49119
100	16.478	1063	4755	33788.3	319889
101	16.478	2019	3099	41830	396024	1.68559
102	16.478	1011	2602	24816.3	234947
103	16.478	2616	3968	51505.4	487625	1.26469
104	16.478	1261	3397	40725.8	385570
105	16.478	1219	2234	28738.6	272081	1.56734
106	16.478	647	1628	18335.9	173594
