# Supplementary material for: Kap-β2/Transportin mediates β-catenin nuclear transport in Wnt signaling
Source: eLife. 2022 Oct 27;11:e70495. doi: 10.7554/eLife.70495 (PMC9665845; doi:10.7554/eLife.70495)
Supplement: Figure 6—source data 1. [file elife-70495-fig6-data1.xlsx]

## Sheet: Figure 6B
condition	Luciferase	avg	norm ratio
GFP + control siRNA	1722119	1891876	0.118081
	1853021		0.127057
	2100488		0.144025
hbcat-GFP + control siRNA	12770446	1.45842e+07	0.875637
	13321766		0.91344
	17660318		1.21092
hbcat-GFP + TNPO1 siRNA	9268038	9.38641e+06	0.635486
	10148873		0.695882
	8742308		0.599438
hbcat-GFP + TNPO2 siRNA	9382962	9697184	0.643366
	9662902		0.662561
	10045688		0.688807
hbcat-GFP + TNPO1+2 siRNA	4601675	5.33406e+06	0.315525
	5692834		0.390343
	5707681		0.391361
