# Supplementary material for: Kap-β2/Transportin mediates β-catenin nuclear transport in Wnt signaling
Source: eLife. 2022 Oct 27;11:e70495. doi: 10.7554/eLife.70495 (PMC9665845; doi:10.7554/eLife.70495)
Supplement: Figure 7—source data 1. [file elife-70495-fig7-data1.xlsx]

## Sheet: Figure 7A
condition	Luciferase	avg	norm ratio
no Wnt3a	40285	45640.3	0.0218628
	46294		0.0251239
	50342		0.0273208
Wnt 3a	1998977	1.84263e+06	1.08485
	1583127		0.859168
	1945781		1.05598
Wnt 3a +M9M (5ug)	147613	175314	0.08011
	183254		0.0994525
	195074		0.105867
Wnt 3a +M9M (2.5ug)	510768	538704	0.277195
	553147		0.300195
	552196		0.299678
Wnt 3a +M9M (1.25ug)	1056796	929626	0.573526
	927823		0.503532
	804259		0.436474
Wnt 3a +M9M (0.625ug)	1530001	1.51863e+06	0.830336
	1694714		0.919726
	1331174		0.722432
condition	Luciferase	avg	norm ratio
GFP	380891	413703	0.0820939
	358527		0.0772738
	501691		0.10813
hbcat-GFP	4582263	4.6397e+06	0.987621
	3976601		0.857082
	5360234		1.1553
hbcat-GFP +M9M (5ug)	1298570	1264924	0.279882
	1215123		0.261897
	1281079		0.276113
hbcat-GFP +M9M (2.5ug)	2140422	2150652	0.461328
	2206932		0.475663
	2104602		0.453607
hbcat-GFP +M9M (1.25ug)	3548140	3.27745e+06	0.764735
	3354983		0.723104
	2929219		0.631338
hbcat-GFP +M9M (0.625ug)	4002326	3519498	0.862626
	3884164		0.837159
	2672004		0.5759

## Sheet: Figure 7B
Condition	Luciferase	avg	norm ratio
GFP	908038		0.155319
	929067		0.158916
WT+ prot. Reag	5875921	5.8463e+06	1.00507
	5816670		0.994933
WT+ctrl 2.5	4376250		0.748551
	4499628		0.769655
WT+M9M2.5	2552217		0.436553
	3231760		0.552788
cNLS+prot. Reag	2301669	2413618	0.953618
	2525567		1.04638
cNLS+ctrl 2.5	3054803		1.26565
	2799952		1.16006
cNLS+M9M2.5	1543484		0.63949
	1979801		0.820263
Condition	Luciferase	avg	norm ratio
GFP	1543287		0.0877793
	1673017		0.0951581
WT GFP	17787746	17581445	1.01173
	17375144		0.988266
WT + Ctrl 2.5	13831905		0.786733
	12997593		0.739279
WT+M 2.5	9721196		0.552924
	12191906		0.693453
cNLS GFP	10171271	1.08932e+07	0.93373
	11615046		1.06627
cNLS+ ctrl 2.5	11024109		1.01202
	10337288		0.948971
cNLS+ M 2.5	11226213		1.03057
	10122238		0.929229
