# Supplementary material for: Kap-β2/Transportin mediates β-catenin nuclear transport in Wnt signaling
Source: eLife journal article supplement (doi:10.7554/elife.70495), 2022-10-27
Supplement: supp [file elife_poa_e70495_Figure_2_figure_supplement_1_source_data_1.xlsx]

## Sheet: Figure 2-supp mtr1-1 RT
	area	mean	Min	Max	IntDen	RawIntDen	Raw N/C
1	0.369	388.871	277	468	143.515	87496	1.73979
2	0.369	223.516	185	271	82.49	50291
3	0.369	321.271	229	391	118.567	72286	1.54576
4	0.369	207.84	151	247	76.705	46764
5	0.369	337.427	268	426	124.529	75921	1.60935
6	0.369	209.667	150	253	77.379	47175
7	0.369	349.702	253	437	129.06	78683	1.47592
8	0.369	236.938	197	281	87.443	53311
9	0.369	344.698	291	421	127.213	77557	1.51284
10	0.369	227.849	167	284	84.089	51266
11	0.369	385.036	295	492	142.1	86633	1.6819
12	0.369	228.929	97	303	84.488	51509
13	0.369	382.92	238	472	141.319	86157	1.61255
14	0.369	237.462	185	291	87.637	53429
15	0.369	308.036	222	375	113.682	69308	1.47983
16	0.369	208.156	167	257	76.821	46835
17	0.369	328.338	248	400	121.175	73876	1.49076
18	0.369	220.249	183	257	81.284	49556
19	0.369	323.636	239	399	119.44	72818	1.40175
20	0.369	230.88	186	266	85.208	51948
21	0.369	291.582	208	403	107.61	65606	1.33205
22	0.369	218.898	189	253	80.786	49252
23	0.369	350.427	287	425	129.327	78846	1.55764
24	0.369	224.973	154	279	83.028	50619
25	0.369	347.431	263	410	128.222	78172	1.66529
26	0.369	208.631	178	248	76.997	46942
27	0.369	348.338	257	436	128.556	78376	1.55206
28	0.369	224.436	189	259	82.829	50498
29	0.369	363.111	245	453	134.008	81700	1.61677
30	0.369	224.591	180	286	82.887	50533
31	0.369	358.022	215	435	132.13	80555	1.62695
32	0.369	220.058	167	271	81.214	49513
33	0.369	359.533	271	453	132.688	80895	1.44932
34	0.369	248.071	175	310	91.552	55816
35	0.369	396.609	294	476	146.371	89237	1.67132
36	0.369	237.302	168	299	87.578	53393
37	0.369	340.778	268	413	125.766	76675	1.51595
38	0.369	224.796	177	270	82.962	50579
39	0.369	277.036	228	329	102.242	62333	1.43426
40	0.369	193.156	146	235	71.285	43460
41	0.369	281.769	218	342	103.989	63398	1.44883
42	0.369	194.48	158	224	71.774	43758
43	0.369	367.418	290	454	135.598	82669	1.60794
44	0.369	228.502	176	277	84.33	51413
45	0.369	332.436	265	403	122.687	74798	1.63579
46	0.369	203.227	165	258	75.002	45726
47	0.369	369.324	276	477	136.301	83098	1.67739
48	0.369	220.178	145	276	81.258	49540
49	0.369	411.391	304	541	151.826	92563	1.78459
50	0.369	230.524	179	284	85.076	51868
51	0.369	402.813	263	533	148.661	90633	1.58258
52	0.369	254.529	200	295	93.935	57269
53	0.369	413.613	302	522	152.647	93063	1.75634
54	0.369	235.498	165	287	86.912	52987
55	0.369	309.742	224	388	114.312	69692	1.63985
56	0.369	188.884	144	233	69.709	42499
57	0.369	328.373	224	398	121.188	73884	1.53906
58	0.369	213.36	153	262	78.742	48006
59	0.369	369.116	242	462	136.224	83051	1.61145
60	0.369	229.058	172	274	84.535	51538
61	0.369	382.013	231	528	140.984	85953	1.55667
62	0.369	245.404	174	306	90.568	55216
63	0.369	392.32	288	512	144.788	88272	1.69904
64	0.369	230.907	183	291	85.218	51954
65	0.369	313.827	233	423	115.82	70611	1.4296
66	0.369	219.52	164	260	81.015	49392
67	0.369	347.236	275	455	128.149	78128	1.71194
68	0.369	202.831	163	251	74.856	45637
69	0.369	321.716	224	457	118.731	72386	1.59909
70	0.369	201.187	154	245	74.249	45267
71	0.369	342.338	148	471	126.342	77026	1.52751
72	0.369	224.116	178	275	82.711	50426
73	0.369	354.711	144	474	130.908	79810	1.42147
74	0.369	249.538	175	298	92.093	56146
75	0.369	377.076	230	536	139.162	84842	1.58367
76	0.369	238.102	185	289	87.873	53573
77	0.369	268.542	203	320	99.107	60422	1.39055
78	0.369	193.12	155	220	71.272	43452
79	0.369	333.098	285	382	122.932	74947	1.57362
80	0.369	211.676	155	283	78.12	47627
81	0.369	372.449	256	610	137.455	83801	1.65317
82	0.369	225.293	177	305	83.146	50691
83	0.369	353.302	218	503	130.388	79493	1.53322
84	0.369	230.431	187	275	85.042	51847
85	0.743	309.52	254	371	230.044	54785	1.53726
86	0.743	201.345	158	253	149.645	35638
87	0.743	269.825	218	375	200.542	47759	1.43774
88	0.743	187.672	162	216	139.484	33218
89	0.743	295.548	246	359	219.66	52312	1.54345
90	0.743	191.486	160	242	142.318	33893
91	0.743	335.079	276	394	249.041	59309	1.55851
92	0.743	215	184	250	159.794	38055
93	0.743	279.266	219	319	207.559	49430	1.48845
94	0.743	187.621	162	223	139.446	33209
95	0.743	278.249	227	344	206.803	49250	1.4017
96	0.743	198.508	159	239	147.537	35136
97	0.743	317.073	267	377	235.659	56122	1.67319
98	0.743	189.503	157	237	140.844	33542
99	0.743	303.621	244	361	225.661	53741	1.49696
100	0.743	202.825	166	240	150.746	35900
101	0.743	296.605	246	338	220.445	52499	1.41966
102	0.743	208.927	156	238	155.281	36980
103	0.743	241.644	184	299	179.597	42771	1.47156
104	0.743	164.209	137	202	122.045	29065
105	0.743	196.232	163	238	145.845	34733	1.49274
106	0.743	131.458	109	172	97.703	23268
107	0.743	317.661	259	366	236.095	56226	1.56951
108	0.743	202.395	162	246	150.426	35824
109	0.743	309.52	254	371	230.044	54785	1.5386
110	0.743	201.169	167	244	149.515	35607
111	0.743	316.006	267	378	234.865	55933	1.59063
112	0.743	198.667	170	250	147.655	35164
113	0.743	268.085	213	305	199.249	47451	1.60889
114	0.743	166.627	144	206	123.842	29493
115	0.743	290.983	248	347	216.267	51504	1.50645
116	0.743	193.158	166	245	143.561	34189
117	0.743	292.802	241	384	217.619	51826	1.4367
118	0.743	203.802	161	245	151.472	36073
119	0.743	275.842	223	322	205.014	48824	1.44437
120	0.743	190.977	153	237	141.94	33803
121	0.743	326.508	264	406	242.671	57792	1.60716
122	0.743	203.158	172	241	150.993	35959
123	0.743	343.836	282	441	255.549	60859	1.62956
124	0.743	211	169	239	156.822	37347
125	0.743	312.39	250	384	232.178	55293	1.42072
126	0.743	219.881	185	262	163.422	38919
127	0.743	334.61	288	396	248.692	59226	1.65247
128	0.743	202.492	174	230	150.498	35841
129	0.743	292.068	233	512	217.074	51696	1.41788
130	0.743	205.989	171	261	153.097	36460
131	0.743	284.458	239	329	211.417	50349	1.5585
132	0.743	182.52	152	214	135.654	32306
133	0.743	400.486	296	721	297.653	70886	1.7177
134	0.743	233.153	201	278	173.286	41268
135	0.743	234.339	192	277	174.168	41478	1.41231
136	0.743	165.927	143	192	123.322	29369
137	0.743	261.785	212	322	194.567	46336	1.46847
138	0.743	178.271	151	230	132.497	31554
139	0.743	273.831	224	322	203.519	48468	1.52386
140	0.743	179.695	140	218	133.555	31806

## Sheet: Figure 2-supp mtr1-1 37C
	area	mean	Min	Max	IntDen	RawIntDen	Raw N/C
1	0.369	186.92	151	234	68.984	42057	0.987833
2	0.369	189.222	149	231	69.834	42575
3	0.369	203.222	140	255	75	45725	1.07227
4	0.369	189.524	145	223	69.945	42643
5	0.369	202.711	148	251	74.812	45610	1.05496
6	0.369	192.151	137	239	70.915	43234
7	0.369	189.16	142	237	69.811	42561	0.989354
8	0.369	191.196	153	238	70.562	43019
9	0.369	196.378	152	251	72.474	44185	1.08707
10	0.369	180.649	128	218	66.67	40646
11	0.369	199.862	157	243	73.76	44969	1.06645
12	0.369	187.409	148	219	69.164	42167
13	0.369	189.124	138	236	69.798	42553	1.06871
14	0.369	176.964	141	209	65.31	39817
15	0.369	184.56	135	243	68.113	41526	1.03974
16	0.369	177.507	148	232	65.51	39939
17	0.369	176.64	125	211	65.19	39744	1.07003
18	0.369	165.08	138	195	60.924	37143
19	0.369	178.182	142	226	65.759	40091	1.13898
20	0.369	156.44	111	194	57.735	35199
21	0.369	184.551	132	246	68.11	41524	1.11666
22	0.369	165.271	116	196	60.994	37186
23	0.369	176.991	128	216	65.32	39823	1.03147
24	0.369	171.591	144	215	63.327	38608
25	0.369	189.453	139	234	69.919	42627	1.10829
26	0.369	170.942	127	206	63.087	38462
27	0.369	198.382	154	236	73.214	44636	1.16616
28	0.369	170.116	128	217	62.782	38276
29	0.369	156.809	115	201	57.871	35282	1.03905
30	0.369	150.916	125	182	55.696	33956
31	0.369	185.889	143	234	68.603	41825	1.18713
32	0.369	156.587	118	221	57.789	35232
33	0.369	149.564	111	192	55.198	33652	1.09026
34	0.369	137.182	112	176	50.628	30866
35	0.369	193.898	130	237	71.559	43627	1.12036
36	0.369	173.067	137	218	63.871	38940
37	0.369	188.049	139	226	69.401	42311	1.04577
38	0.369	179.818	141	219	66.363	40459
39	0.369	190.08	132	245	70.15	42768	1.00087
40	0.369	189.916	150	239	70.09	42731
41	0.369	163.809	125	201	60.455	36857	1.02829
42	0.369	159.302	129	201	58.791	35843
43	0.369	171.929	118	203	63.451	38684	1.11807
44	0.369	153.773	116	190	56.751	34599
45	0.369	159.578	127	200	58.893	35905	1.02806
46	0.369	155.222	124	204	57.286	34925
47	0.369	173.72	123	223	64.112	39087	1.06582
48	0.369	162.991	107	199	60.153	36673
49	0.369	162.502	128	196	59.972	36563	1.08344
50	0.369	149.987	120	178	55.354	33747
51	0.369	179.951	144	224	66.412	40489	1.07549
52	0.369	167.32	128	195	61.75	37647
53	0.369	168.8	123	220	62.297	37980	0.982843
54	0.369	171.747	138	213	63.384	38643
55	0.369	208.88	103	264	77.088	46998	1.10957
56	0.369	188.253	122	240	69.476	42357
57	0.369	192.044	144	243	70.875	43210	1.07157
58	0.369	179.218	147	216	66.141	40324
59	0.369	188.409	147	227	69.533	42392	1.09926
60	0.369	171.396	123	210	63.255	38564
61	0.369	199.382	129	247	73.583	44861	1.10215
62	0.369	180.902	135	222	66.763	40703
63	0.369	180.756	132	246	66.709	40670	1.09946
64	0.369	164.404	131	202	60.674	36991
65	0.369	195.991	144	241	72.332	44098	1.11103
66	0.369	176.404	137	217	65.103	39691
67	0.369	186.836	147	244	68.953	42038	1.0274
68	0.369	181.853	136	213	67.114	40917
69	0.369	189.862	137	248	70.07	42719	1.09823
70	0.369	172.88	142	208	63.802	38898
71	0.369	179.187	120	230	66.13	40317	1.00732
72	0.369	177.884	153	205	65.649	40024
73	0.369	174.693	129	211	64.472	39306	1.06083
74	0.369	164.676	140	203	60.775	37052
75	0.369	207.947	130	289	76.744	46788	1.11952
76	0.369	185.747	161	212	68.551	41793
77	0.369	172.951	136	217	63.829	38914	0.976659
78	0.369	177.084	128	212	65.354	39844
79	0.369	173.822	121	237	64.15	39110	0.980963
80	0.369	177.196	151	228	65.395	39869
81	0.369	178.964	139	215	66.048	40267	1.03527
82	0.369	172.867	137	204	63.798	38895
83	0.369	153.391	119	188	56.61	34513	1.10978
84	0.369	138.218	111	165	51.01	31099
85	0.369	201.493	162	245	74.362	45336	1.12723
86	0.369	178.751	143	211	65.969	40219
87	0.369	206.293	133	281	76.134	46416	1.08055
88	0.369	190.916	156	230	70.459	42956
89	0.369	190.076	149	249	70.149	42767	1.09896
90	0.369	172.96	115	222	63.832	38916
91	0.369	195.956	146	261	72.319	44090	0.999184
92	0.369	196.116	163	236	72.378	44126
93	0.369	216.987	154	278	80.08	48822	1.17882
94	0.369	184.071	149	216	67.933	41416
95	0.369	206.231	133	281	76.111	46402	1.08368
96	0.369	190.307	159	231	70.234	42819
97	0.369	177.467	146	218	65.495	39930	1.12711
98	0.369	157.453	131	189	58.109	35427
99	0.369	181.907	131	236	67.134	40929	1.07189
100	0.369	169.707	125	198	62.631	38184
101	0.369	173.204	128	247	63.922	38971	1.11774
102	0.369	154.96	124	179	57.189	34866
103	0.369	204.204	144	252	75.363	45946	1.12414
104	0.369	181.653	147	215	67.04	40872
105	0.743	180.65	147	219	134.264	31975	1.06078
106	0.743	170.299	136	197	126.572	30143
107	0.743	142.384	114	173	105.824	25202	0.9875
108	0.743	144.186	123	166	107.164	25521
109	0.743	152.825	126	181	113.584	27050	1.02373
110	0.743	149.282	123	174	110.951	26423
111	0.743	161.701	129	188	120.181	28621	1.09037
112	0.743	148.299	125	175	110.221	26249
113	0.743	166.034	135	196	123.401	29388	1.06854
114	0.743	155.384	133	183	115.486	27503
115	0.743	156.525	128	183	116.334	27705	1.05861
116	0.743	147.859	121	176	109.893	26171
117	0.743	163.768	129	189	121.718	28987	1.07883
118	0.743	151.802	127	173	112.824	26869
119	0.743	177.102	146	205	131.627	31347	1.09155
120	0.743	162.249	139	191	120.588	28718
121	0.743	171.977	128	215	127.819	30440	1.06255
122	0.743	161.853	131	192	120.294	28648
123	0.743	147.085	119	171	109.318	26034	1.0304
124	0.743	142.746	124	167	106.093	25266
125	0.743	145.655	117	170	108.255	25781	1.11005
126	0.743	131.215	111	151	97.523	23225
127	0.743	147.825	127	176	109.868	26165	1.09075
128	0.743	135.525	115	164	100.727	23988
129	0.743	134.814	106	168	100.197	23862	1.01132
130	0.743	133.305	107	155	99.076	23595
131	0.743	146.955	116	176	109.221	26011	1.04441
132	0.743	140.706	115	168	104.577	24905
133	0.743	151.531	125	181	112.622	26821	1.09554
134	0.743	138.316	121	159	102.801	24482
135	0.743	148.537	123	181	110.397	26291	1.09391
136	0.743	135.785	117	162	100.92	24034
137	0.743	131.763	106	163	97.93	23322	1.03144
138	0.743	127.746	110	146	94.944	22611
139	0.743	162.232	131	187	120.575	28715	1.0165
140	0.743	159.599	137	185	118.619	28249
141	0.743	143.876	110	183	106.933	25466	0.992169
142	0.743	145.011	117	170	107.777	25667
143	0.743	158.379	131	187	117.712	28033	1.0334
144	0.743	153.26	113	179	113.907	27127
145	0.743	147.712	117	171	109.784	26145	1.06623
146	0.743	138.537	112	165	102.965	24521
147	0.743	164.277	131	190	122.095	29077	1.1275
148	0.743	145.701	124	173	108.289	25789
149	0.743	137.689	116	162	102.335	24371	1.07727
150	0.743	127.814	109	155	94.995	22623
