# Supplementary material for: Kap-β2/Transportin mediates β-catenin nuclear transport in Wnt signaling
Source: eLife. 2022 Oct 27;11:e70495. doi: 10.7554/eLife.70495 (PMC9665845; doi:10.7554/eLife.70495)
Supplement: Supplementary file 1. [file elife-70495-supp1.xlsx]

## Sheet: Supplementary File 1
S. cerevisiae strains
Name	Genotype	Origin	Generation
W303a	MATa, ade2-1 can1-100 his3-11,15 leu2-3,112 trp1-1 ura3-1	EUROSCARF
W303α	MATα, ade2-1 can1-100 his3-11,15 leu2-3,112 trp1-1 ura3-1	EUROSCARF
HHY110	W303, MAT alpha tor1-1 fpr1::natMX6MX6 PMA1-2xFKBP12::TRP1	Euroscarf (Haruki et al., 2008)
DTCPL1635	HHY110, HEH2-mCherry::KAN	This study	Integration through PCR product transformation in HHY110
WHCPL13	DTCPL1635, Kap95-FRB:: HIS3,	This study	Integration through PCR product transformation in DTCPL1635
WHCPL1	DTCPL1635, Kap104-FRB::HIS3,	This study	Integration through PCR product transformation in DTCPL1635
WHCPL2	DTCPL1635, Kap108-FRB::HIS3	This study	Integration through PCR product transformation in DTCPL1635
WHCPL3	DTCPL1635, Kap111-FRB::HIS3	This study	Integration through PCR product transformation in DTCPL1635
WHCPL7	DTCPL1635, Kap114-FRB::HIS3	This study	Integration through PCR product transformation in DTCPL1635
WHCPL10	DTCPL1635, Kap119-FRB::HIS3	This study	Integration through PCR product transformation in DTCPL1635
WHCPL14	DTCPL1635, Kap120+FRB::HIS3	This study	Integration through PCR product transformation in DTCPL1635
WHCPL15	DTCPL1635, Kap121+FRB::HIS3	This study	Integration through PCR product transformation in DTCPL1635
WHCPL11	DTCPL1635, Kap122-FRB::HIS3	This study	Integration through PCR product transformation in DTCPL1635
WHCPL12	DTCPL1635, Kap123-FRB::HIS3	This study	Integration through PCR product transformation in DTCPL1635
BWCPL1314	W303, HEH2-mCherry::natMX6	(Thaller et al., 2019)
WHCPL16	mtr1-1::TRP1, HEH2-mCherry::KAN	This study	Integration through PCR product transformation in mtr1-1 strain39
WHCPL17	WHCPL16, xβ-catenin (1-782)-GFP::URA3	This study	Transformation of linearized xβ-catenin_GFP_pRS406ADH1 in WHCPL1316
WHCPL19	WHCPL16, xβ-catenin (665-745)-GFP::URA3	This study	Transformation of linearized xβ-catenin_665-745_GFP_pRS406ADH1 in WHCPL1316
WHCPL21	BWCPL1314, xβ-catenin (1-782)-GFP::URA3	This study	Transformation of linearized xβ-catenin_GFP_pRS406ADH1 in BWCPL1314
WHCPL23	BWCPL1314, xβ-catenin (1-664)-GFP::URA3	This study	Transformation of linearized xβ-catenin_ΔC-terminus_GFP_pRS406ADH1 in BWCPL1314
WHCPL25	BWCPL1314, xβ-catenin (141-782)-GFP::URA3	This study	Transformation of linearized xβ-catenin_ΔN-terminus_GFP_pRS406ADH1 in BWCPL1314
WHCPL27	BWCPL1314, xβ-catenin (Δ141-664)-GFP::URA3	This study	Transformation of linearized xβ-catenin_ΔARM_GFP_pRS406ADH1 in BWCPL1314
WHCPL29	BWCPL1314, xβ-catenin (1-140)-GFP::URA3	This study	Transformation of linearized xβ-catenin_N-terminus_GFP_pRS406ADH1 in BWCPL1314
WHCPL31	BWCPL1314, xβ-catenin (141-664)-GFP::URA3	This study	Transformation of linearized xβ-catenin_ARM_GFP_pRS406ADH1 in BWCPL1314
WHCPL33	BWCPL1314, xβ-catenin (665-782)-GFP::URA3	This study	Transformation of linearized xβ-catenin_C-terminus_GFP_pRS406ADH1 in BWCPL1314
WHCPL35	BWCPL1314, xβ-catenin (665-745)-GFP::URA3	This study	Transformation of linearized xβ-catenin_665-745_GFP_pRS406ADH1 in BWCPL1314
WHCPL37	BWCPL1314, xβ-catenin (704-782)-GFP::URA3	This study	Transformation of linearized xβ-catenin_704-782_GFP_pRS406ADH1 in BWCPL1314
WHCPL39	BWCPL1314, xβ-catenin (746-782)-GFP::URA3	This study	Transformation of linearized xβ-catenin_746-782_GFP_pRS406ADH1 in BWCPL1314
WHCPL41	BWCPL1314, MBP(x3)-GFP::HIS	This study	Transformation of linearized MBP(x3)_GFP in BWCPL1314
WHCPL43	BWCPL1314, xβ-catenin (665-703)-MBP(x3)-GFP::HIS	This study	Transformation of linearized xβ-catenin_(665-703)_MBP(x3)_GFP in BWCPL1314
WHCPL45	BWCPL1314, xβ-catenin (665-703, P687A, M688A)-MBP(x3)-GFP::HIS	This study	Transformation of linearized xβ-catenin_(665-703, P687A,M688A)_MBP(x3)_GFP in BWCPL1314
