# Supplementary material for: Kap-β2/Transportin mediates β-catenin nuclear transport in Wnt signaling
Source: eLife. 2022 Oct 27;11:e70495. doi: 10.7554/eLife.70495 (PMC9665845; doi:10.7554/eLife.70495)
Supplement: Supplementary file 2. [file elife-70495-supp2.xlsx]

## Sheet: Supplementary File 2
Plasmids for Yeast Experiments
Name	Insert	Vector	Cloning Strategy/Source
xβ-catenin_GFP_pRS406ADH1	Xenopus β-catenin (1-782)_GFP	pRS406ADH1	Gibson assembly
xβ-catenin_ΔN-terminus_GFP_pRS406ADH1	Xenopus β-catenin (141-782)_GFP	pRS406ADH1	Gibson assembly
xβ-catenin_ΔARM_GFP_pRS406ADH1	Xenopus β-catenin (Δ141-664)_GFP	pRS406ADH1	Gibson assembly
xβ-catenin_ΔC-terminus_GFP_pRS406ADH1	Xenopus β-catenin (1-664)_GFP	pRS406ADH1	Gibson assembly
xβ-catenin_N-terminus_GFP_pRS406ADH1	Xenopus β-catenin (1-140)_GFP	pRS406ADH1	Gibson assembly
xβ-catenin_ARM_GFP_pRS406ADH1	Xenopus β-catenin (141-664)_GFP	pRS406ADH1	Gibson assembly
xβ-catenin_C-terminus_GFP_pRS406ADH1	Xenopus β-catenin (665-782)_GFP	pRS406ADH1	Gibson assembly
xβ-catenin_665-745_GFP_pRS406ADH1	Xenopus β-catenin (665-745)_GFP	pRS406ADH1	Gibson assembly
xβ-catenin_704-782_GFP_pRS406ADH1	Xenopus β-catenin (704-782)_GFP	pRS406ADH1	Gibson assembly
xβ-catenin_746-782_GFP_pRS406ADH1	Xenopus β-catenin (746-782)_GFP	pRS406ADH1	Gibson assembly
MBP(x3)_GFP	no insert	MBP(x3)_GFP	Popken et al., 2015
xβ-catenin_(665-703)_MBP(x3)_GFP	Xenopus β-catenin_(665-703)	MBP(x3)_GFP	Gibson assembly
xβ-catenin_(665-703, P687A,M688A)_MBP(x3)_GFP	Xenopus β-catenin_(665-703, P687A,M688A)	MBP(x3)_GFP	Site-directed mutagenesis
Plasmids for Vertebrate Experiments
Name	Insert	Vector	Cloning Strategy
GFP_pCS2+	GFP	pCS2+	Gibson assembly
xβ-catenin_GFP_pCS2+	Xenopus β-catenin (1-782)_GFP	pCS2+	Gibson assembly
xβ-catenin_Δ665-745_GFP_pCS2+	Xenopus β-catenin (Δ665-745)_GFP	pCS2+	Gibson assembly
cNLS_xβ-catenin_Δ665-745_GFP_pCS2+	cNLS_Xenopus β-catenin (Δ665-745)_GFP	pCS2+	Gibson assembly
xβ-catenin_665-745_GFP_pCS2+	Xenopus β-catenin (665-745)_GFP	pCS2+	Gibson assembly
hβ-catenin_GFP_pCS2+	full length Human β-catenin_GFP	pCS2+	Gibson assembly
hβ-catenin_Δ665-745_GFP_pCS2+	Human β-catenin (Δ665-745)_GFP	pCS2+	Site-directed mutagenesis
hβ-catenin_665-782_GFP_pCS2+	Human β-catenin (665-782)_GFP	pCS2+	Gibson assembly
hβ-catenin_(665-782, P687A,M688A)_GFP_pCS2+	Human β-catenin (665-782, P687A,M688A)_GFP	pCS2+	Site-directed mutagenesis
cNLS_hβ-catenin_GFP_pCS2+	full length Human β-catenin_GFP	pCS2+	Site-directed mutagenesis
In vitro binding experiment
Name	Insert	Vector	Cloning Strategy
pGEX_6P1	GST	pGEX	Amersham Biosciences
pGEX_hβ-catenin	GST-human β-catenin	pGEX	Addgene (#24193)
pGEX_hβ-catenin_P687A,M688A	GST-human β-catenin (P687A,M688A)	pGEX	Site-directed mutagenesis
pGEX_hTransportin 1	GST-human Transportin 1	pGEX	Dr. Yuh Min Chook
pET28a-His6-Ran(Q69L)	His6-human RanQ69L	pET28a	Addgene (#171563)
