# Supplementary material for: Kap-β2/Transportin mediates β-catenin nuclear transport in Wnt signaling
Source: eLife. 2022 Oct 27;11:e70495. doi: 10.7554/eLife.70495 (PMC9665845; doi:10.7554/eLife.70495)
Supplement: Supplementary file 3. [file elife-70495-supp3.xlsx]

## Sheet: FRB cloning primers
FRB cloning primers
Gene	Primers	Sequence 5’-3'
Kap95	Kap95+F2_F2	CAAGCCACAAAAGATACAGCAAGATGGGCTAGAGAGCAACAGAAGCGTCAATTATCCTTACGGATCCCCGGGTTAATTAA
	Kap95+R1_R	CAGCTAAGATGTTTGCAAGCAAGAATTAACAGATAAGCCGCTTCGCTAGTAACGCAACTCGAATTCGAGCTCGTTTAAAC
Kap104	Kap104+F2_F	CAAATTTCTGCAATAAATTTCACGCCCGATGAAATCTCCTTCTTACAACAGTTCACCAGCCGGATCCCCGGGTTAATTAA
	Kap104+R1_R	CATGTCTGGCTGCATTATGTATATGCTGCACCATGGATATGCTATTCTAAGAGAACCCGCGAATTCGAGCTCGTTTAAAC
Kap108/Sxm1	Kap108+F2_F	TATCTGGATGAATCTAAGAGAGATTCCTTGCAGGTAATTCTGGAATTTGTTTCTCAACACCGGATCCCCGGGTTAATTAA
	Kap108+R1_R	TGTTTAGACAGTCAAGGTCCAGATTACACCACAATAGTGTATCTGATCCGGTTAAGTCGGGAATTCGAGCTCGTTTAAAC
Kap111/Mtr10	Kap111+F2_F	GAAGGAATTAGGGCGTTTGTTGGATGGTATTCAAGAAAGAATATCAATTCGAGGTTTGAACGGATCCCCGGGTTAATTAA
	Kap111+R1_R	TCTAAGGTTTACCTCGCCTCAATACAATTCGAACGGCGCTTACAACGGCGCCCTAATGGCGAATTCGAGCTCGTTTAAAC
Kap114	Kap114+F2_F	CATTGTATTTACGAGACTCTATCCGACAGTGAACGTAAAGTTCTTTCAGAAGCCCTTTTGCGGATCCCCGGGTTAATTAA
	Kap114+R1_R	GCTCTGAGGGTGCTAAATGGTCCAAGACTTTGTTTATTCCAATCGGGTCCATTATCTGACGAATTCGAGCTCGTTTAAAC
Kap119/Nmd5	Kap119+F2_F	GGAATCTTGAGACATCTGACCCCGGCTGATCAAGAACTATTCATGGGAATTATGAATGCCCGGATCCCCGGGTTAATTAA
	Kap119+R1_R	ACTCCCTGACAAAGCTTGTGAATATTATTATAGGAGATGTACATTCTCTCATTTTCGGCCGAATTCGAGCTCGTTTAAAC
Kap120	Kap120+F2_F	CCTAGTTTACTAGAGAACTTACAAATGTTTTTATCCATCCAGCCTCAAGAGGCTCGTCCACGGATCCCCGGGTTAATTAA
	Kap120+R1_R	TTACCTGTGGGAGACAATCTATGTAATGGCGAACTCATCCTTTCCTGTGCTCTATAGTGCGAATTCGAGCTCGTTTAAAC
Kap121/Pse1	Kap121+F2_F	ATGGCAATTTTCAATAGATATCCAGCTGATATTATGGAGAAAGTACATAAATGGTTTGCACGGATCCCCGGGTTAATTAA
	Kap121+R1_R	TAACTTAGCACAAGTGGTCTTTACCTCCATCATTTCCTTATCCATTGCCGCTGGTGTCGGGAATTCGAGCTCGTTTAAAC
Kap122/Pdr6	Kap122+F2_F	GCTGGAAATGTTATTTTGCAGTGGTGGTTGGATTGTACCACACTTCCAAATTACCAAGGACGGATCCCCGGGTTAATTAA
	Kap122+R1_R	CACTCCATGGAAGACACGATACGTCCATTAAATTACGCAGATATCGAGACCAGCGGGCCCGAATTCGAGCTCGTTTAAAC
Kap123	Kap123+F2_F	CTAAACACTACTTACAACGGAATTGTTGCTCAAAATCCGGTTTTAGCTGCCGTCATTGCTCGGATCCCCGGGTTAATTAA
	Kap123+R1_R	CTCAGGACACATACATACAAGATTGGCAAAAGTGAAGGCAGGTGCCTAAGATTGGGTGGGGAATTCGAGCTCGTTTAAAC

## Sheet: Colony PCR Primers
Colony PCR Primers
Gene	Primers	Sequence 5’-3'	Colony PCR size
Kap 95	Kap95_F1	ACATCATGGCGTTGTGTGTT	830bp
Kap 104	Kap104_F1	TCCGTTAACGCATTGGAC	669bp
Kap 108	Kap108_F1	ACCGTGATGCTGTTACCG	668bp
Kap 111	Kap111_F1	TGGCCAAGTAACCCTTAATG	559bp
Kap 114	Kap114_F1	GAATCTGTTGTTCAGCTACTGG	540bp
Kap 119	Kap119_F1	GTCCATTGCGAACTTACAAC	517bp
Kap 120	Kap120_F2	CAAGCTTTTAACCGGATGGA	800bp
Kap 121	Kap121_F1	CCGCTGTAGTTGATTCAGTC	593bp
Kap 122	Kap122_F1	GGTAGCCAAGTTTCCAATTG	598bp
Kap 123	Kap123_F1	GTCTACTCTAGGTAGGGAAGAG	565bp
	FRB_R1 (reverse primer)	TTGGAGGAGGTCCTTGAC
